# Supplementary material
Source: PubMed Central journal article supplement (PMC6350249)

## Characterization and Synthesis of Eudistidine C, a Bioactive Marine Alkaloid with an Intriguing Molecular Scaffold

Susanna T. S. Chan,<sup>†</sup> Roger R. Nani,<sup>‡</sup> Evan A. Schauer,<sup>‡</sup> Gary E. Martin,<sup>§</sup> R. Thomas Williamson,<sup>§</sup> Josep Saurí,<sup>§</sup> Alexei V. Buevich,<sup>§</sup> Wes A. Schafer,<sup>§</sup> Leo A. Joyce,<sup>§</sup> Andrew K. L. Goey,<sup>||</sup> William D. Figg,<sup>||</sup> Tanya T. Ransom,<sup>†</sup> Curtis J. Henrich,<sup>†,Δ</sup> Tawnya C. McKee,<sup>†,#</sup> Arvin Moser,<sup>⊥</sup> Scott A. MacDonald,<sup>⊥</sup> Shabana Khan,<sup>°</sup> James B. McMahon,<sup>†</sup> Martin J. Schnermann,<sup>\*,‡</sup> Kirk R. Gustafson<sup>\*,†</sup>

### Supporting Information:

- S3 Color *in situ* photograph of *Eudistoma* sp. and UV characterization of eudistidine C (**1**).
- S4 Experimental and DFT calculated <sup>13</sup>C NMR data for eudistidine C (**1**)
- S5 DFT calculated 4- and 5-bond carbon-proton coupling constants for eudistidine C (**1**)
- S6,7 Data input for ACD/Structure Elucidator
- S8 Top 8 candidates generated by ACD/Structure Elucidator
- S9 Long-range LR-HSQMBC correlations for eudistidine C (**1**)
- S10 LR-HSQMBC spectrum of eudistidine C (**1**)
- S11 <sup>13</sup>C NMR chemical shift comparison of eudistidine C natural product vs synthetic product
- S12 <sup>1</sup>H NMR chemical shift comparison of eudistidine C natural product vs synthetic product
- S13 Chiral resolution of eudistidine C (**1**) natural product
- S14 Preparative chiral separation of synthetic eudistidine C (**1**)
- S15 Experimental ECD spectra for (+)-*R*-eudistidine C (**1a**) and (-)-*S*-eudistidine C (**1b**)
- S16 Conformational analysis and ECD calculation for (+)-*R*-eudistidine C (**1b**)
- S17 p300/HIF-1 $\alpha$  assay and testing results
- S18 Antimalarial screening assay and testing results
- S19,20 Molecular model and atomic coordinates of eudistidine C (**1**)
- S21 Eudistidine C (**1**) <sup>1</sup>H NMR spectrum (600 MHz, CD<sub>3</sub>OD)
- S22 Eudistidine C (**1**) <sup>13</sup>C NMR spectrum (150 MHz, CD<sub>3</sub>OD)
- S23 Eudistidine C (**1**) COSY spectrum (CD<sub>3</sub>OD)
- S24 Eudistidine C (**1**) HSQC spectrum (CD<sub>3</sub>OD)
- S25 Eudistidine C (**1**) HMBC spectrum (CD<sub>3</sub>OD)
- S26 Eudistidine C (**1**) <sup>15</sup>N-<sup>1</sup>H HMBC spectrum (CD<sub>3</sub>OD)
- S27 Synthetic eudistidine C (**1**) free base <sup>1</sup>H NMR spectrum (600 MHz, CD<sub>3</sub>OD)

- S28 Synthetic eudistidine C (**1**) free base  $^{13}\text{C}$  NMR spectrum (150 MHz,  $\text{CD}_3\text{OD}$ )
- S29 Synthetic eudistidine C (**1**) TFA salt  $^1\text{H}$  NMR spectrum (600 MHz,  $\text{CD}_3\text{OD}$ )
- S30 Synthetic eudistidine C (**1**) TFA salt  $^{13}\text{C}$  NMR spectrum (150 MHz,  $\text{CD}_3\text{OD}$ )
- S31 Synthetic eudistidine C (**1**) free base and TFA salt  $^1\text{H}$  NMR spectral comparison (600 MHz,  $\text{CD}_3\text{OD}$ ).
- S32 Eudistidine C (**1**) natural product and synthetic TFA salt  $^1\text{H}$  NMR spectral comparison (600 MHz,  $\text{CD}_3\text{OD}$ )
- S33 Eudistidine C (**1**) natural product and synthetic free base and TFA salt  $^1\text{H}$  NMR spectral comparison (600 MHz,  $\text{CD}_3\text{OD}$ )
- S34 Eudistidine C (**1**) natural product and synthetic free base and TFA salt  $^{13}\text{C}$  NMR spectral comparison (150 MHz,  $\text{CD}_3\text{OD}$ )
- S35 Synthetic eudistidine C *N*-methylindole analogue (**5**)  $^1\text{H}$  NMR spectrum (600 MHz,  $\text{CD}_3\text{OD}$ )
- S36 Synthetic eudistidine C *N*-methylindole analogue (**5**)  $^{13}\text{C}$  NMR spectrum (150 MHz,  $\text{CD}_3\text{OD}$ )
- S37 Synthetic eudistidine C 3-methylindole analogue (**6**)  $^1\text{H}$  NMR spectrum (600 MHz,  $\text{CD}_3\text{OD}$ )
- S38 Synthetic eudistidine C 3-methylindole analogue (**6**)  $^{13}\text{C}$  NMR spectrum (150 MHz,  $\text{CD}_3\text{OD}$ )
- S39 Synthetic eudistidine C *N*-methylpyrrole analogue (**7**)  $^1\text{H}$  NMR spectrum (600 MHz,  $\text{CD}_3\text{OD}$ )
- S40 Synthetic eudistidine C *N*-methylpyrrole analogue (**7**)  $^{13}\text{C}$  NMR spectrum (150 MHz,  $\text{CD}_3\text{OD}$ )
- S41 Synthetic eudistidine C *p*-phenol analogue (**8**)  $^1\text{H}$  NMR spectrum (600 MHz,  $\text{CD}_3\text{OD}$ )
- S42 Synthetic eudistidine C *p*-phenol analogue (**8**)  $^{13}\text{C}$  NMR spectrum (150 MHz,  $\text{CD}_3\text{OD}$ )
- S43 Synthetic eudistidine C resorcinol analogue (**9**)  $^1\text{H}$  NMR spectrum (600 MHz,  $\text{DMSO-}d_6$ )
- S44 Synthetic eudistidine C resorcinol analogue (**9**)  $^{13}\text{C}$  NMR spectrum (150 MHz,  $\text{DMSO-}d_6$ )
- S45 Synthetic eudistidine C phloroglucinol analogue (**10**)  $^1\text{H}$  NMR spectrum (600 MHz,  $\text{CD}_3\text{OD}$ )
- S46 Synthetic eudistidine C phloroglucinol analogue (**10**)  $^{13}\text{C}$  NMR spectrum (150 MHz,  $\text{CD}_3\text{OD}$ )
- S47 Imidazole **4**  $^1\text{H}$  NMR spectrum (600 MHz,  $\text{DMSO-}d_6$ )

**Color *in situ* photograph of *Eudistoma* sp.**

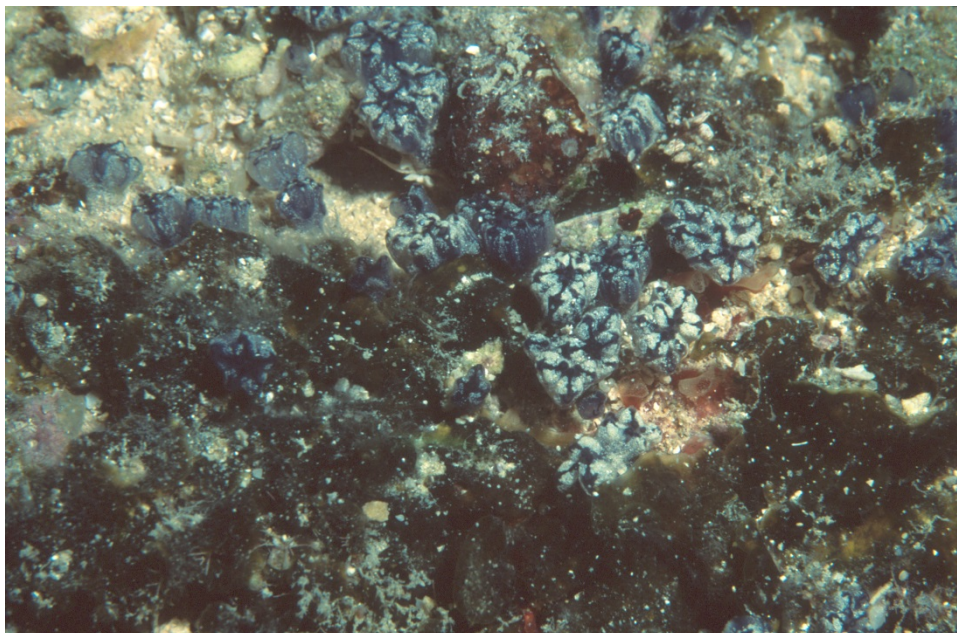

**UV/Vis Absorption Profile of Eudistidine C (1)**

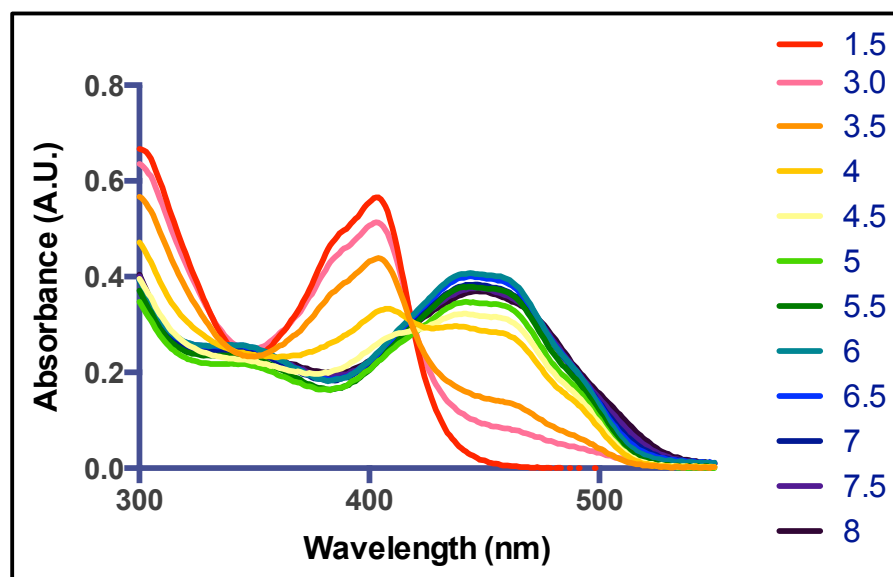

pH effects on the UV/Vis absorption spectra of eudistidine C (1). Absorbance maxima were observed at 446 and 404 nm with the isobestic point at 420 nm.

**Experimental and DFT Calculated  $^{13}\text{C}$  NMR Data for Eudistidine C (1) in  $\text{CD}_3\text{OD}$** 

| Position | Experimentally      | DFT                 |
|----------|---------------------|---------------------|
|          | measured            | calculated          |
|          | $\delta_{\text{C}}$ | $\delta_{\text{C}}$ |
| 2        | 167.5               | 166.1               |
| 3        | 94.3                | 93.0                |
| 3a       | 147.4               | 146.5               |
| 3b       | 117.6               | 117.1               |
| 4        | 126.1               | 126.2               |
| 5        | 130.2               | 128.7               |
| 6        | 136.5               | 136.3               |
| 7        | 129.7               | 129.2               |
| 7a       | 147.0               | 146.8               |
| 8a       | 159.5               | 160.0               |
| 8c       | 157.3               | 156.2               |
| 10       | 73.7                | 75.5                |
| 11       | 130.9               | 134.7               |
| 12 & 16  | 129.8               | 128.9               |
| 13 & 15  | 115.2               | 113.3               |
| 14       | 161.7               | 160.3               |
| 14-OMe   | 55.8                | 53.5                |
| 17       | 126.1               | 125.9               |
| 19       | 148.0               | 143.5               |
| 21       | 127.5               | 124.9               |
| 22       | 120.0               | 122.1               |
| 23 & 27  | 131.9               | 132.8               |
| 24 & 26  | 115.7               | 113.9               |
| 25       | 159.3               | 157.5               |

### DFT Calculated 4- and 5-Bond Carbon-Proton Coupling Constants for Eudistidine C (1)<sup>a</sup>

| DFT calculated $^4J_{CH}$ and $^5J_{CH}$ (Hz) |        |      |       |       |       |       |      |      |      |      |      |  |
|-----------------------------------------------|--------|------|-------|-------|-------|-------|------|------|------|------|------|--|
| Carbon                                        | Proton |      |       |       |       |       |      |      |      |      |      |  |
|                                               | 2      | 3    | 4     | 5     | 6     | 7     | 15   | 16   | 23   | 24   | 24   |  |
| 3a                                            |        |      |       | 0.79  |       | 0.95  |      |      |      |      |      |  |
| 3b                                            | 1.33   |      |       |       | -1.46 |       |      |      |      |      |      |  |
| 4                                             |        |      |       |       |       | -1.19 |      |      |      |      |      |  |
| 7                                             |        |      | -1.54 |       |       |       |      |      |      |      |      |  |
| 7a                                            |        |      |       | -1.51 |       |       |      |      |      |      |      |  |
| 8a                                            |        | 0.84 |       |       |       |       | 0.34 | 0.87 |      |      |      |  |
| 8c                                            |        |      |       |       |       |       |      |      |      |      |      |  |
| 10                                            | 0.47   |      |       |       |       |       | 0.44 |      |      |      |      |  |
| 17                                            |        |      |       |       |       |       |      | 0.41 | 0.47 | 0.40 |      |  |
| 21                                            |        |      |       |       |       |       |      |      |      |      | 0.37 |  |

<sup>a</sup>four-bond couplings highlighted in green and five-bond couplings in pink

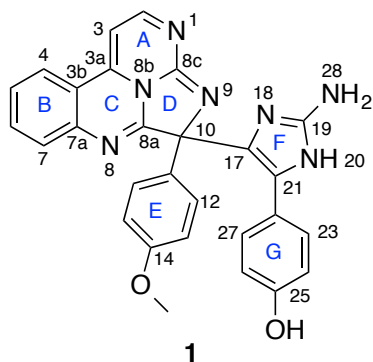

## Summary of the Spectroscopic Data Used by ACD/Structure Elucidator

The following input was used in ACD/Structure Elucidator: molecular formula C<sub>28</sub>H<sub>21</sub>O<sub>2</sub>N<sub>7</sub>, two *para*-disubstituted benzene rings, a 1,2-disubstituted benzene ring, and the chemical shift data below. The software was run on a PC with Windows 7, Dual Core CPU 2.9 GHz and 16 GB RAM.

| 1H |             |       | 13C |             |        | COSY |         |         |
|----|-------------|-------|-----|-------------|--------|------|---------|---------|
| #  | Shift (ppm) | Atoms | #   | Shift (ppm) | XHn    | #    | F2(ppm) | F1(ppm) |
| 1  | 3.75        | 3     | 1   | 55.86       | CH3(q) | 1    | 6.29    | 6.84    |
| 2  | 6.29        | 2     | 2   | 94.31       | CH(d)  | 2    | 6.84    | 6.29    |
| 3  | 6.76        | 1     | 3   | 115.22      | CH(d)  | 3    | 7.57    | 7.80    |
| 4  | 6.84        | 2     | 4   | 115.66      | CH(d)  | 4    | 7.57    | 8.05    |
| 5  | 6.90        | 2     | 5   | 117.64      | C(s)   | 5    | 7.64    | 7.80    |
| 6  | 7.57        | 1     | 6   | 120.01      | C(s)   | 6    | 7.67    | 6.90    |
| 7  | 7.64        | 1     | 7   | 126.14      | CH(d)  | 7    | 7.80    | 7.64    |
| 8  | 7.67        | 2     | 8   | 127.51      | C(s)   | 8    | 8.05    | 7.57    |
| 9  | 7.80        | 1     | 9   | 129.75      | CH(d)  | 9    | 8.43    | 6.76    |
| 10 | 8.05        | 1     | 10  | 129.78      | CH(d)  |      |         |         |
| 11 | 8.43        | 1     | 11  | 130.15      | CH(d)  |      |         |         |
|    |             |       | 12  | 130.94      | C(s)   |      |         |         |
|    |             |       | 13  | 131.89      | CH(d)  |      |         |         |
|    |             |       | 14  | 136.46      | CH(d)  |      |         |         |
|    |             |       | 15  | 146.97      | C(s)   |      |         |         |
|    |             |       | 16  | 147.39      | C(s)   |      |         |         |
|    |             |       | 17  | 148.04      | C(s)   |      |         |         |
|    |             |       | 18  | 157.24      | C(s)   |      |         |         |
|    |             |       | 19  | 159.28      | C(s)   |      |         |         |
|    |             |       | 20  | 159.47      | C(s)   |      |         |         |
|    |             |       | 21  | 161.68      | C(s)   |      |         |         |
|    |             |       | 22  | 167.50      | CH(d)  |      |         |         |

**LR-HSQMBC**

| #  | F2(ppm) | F1(ppm) |
|----|---------|---------|
| 1  | 3.69    | 128.28  |
| 2  | 3.69    | 114.00  |
| 3  | 3.69    | 54.49   |
| 4  | 3.69    | 160.90  |
| 5  | 6.32    | 120.55  |
| 6  | 6.32    | 117.20  |
| 7  | 6.32    | 158.44  |
| 8  | 6.32    | 128.08  |
| 9  | 6.32    | 114.61  |
| 10 | 6.80    | 130.66  |
| 11 | 6.80    | 114.61  |
| 12 | 6.80    | 128.08  |

**HSQC**

| #  | F2(ppm) | F1(ppm) |
|----|---------|---------|
| 1  | 7.80    | 136.46  |
| 2  | 7.67    | 129.78  |
| 3  | 7.64    | 129.75  |
| 4  | 7.57    | 130.15  |
| 5  | 6.29    | 115.66  |
| 6  | 6.84    | 131.89  |
| 7  | 6.76    | 94.31   |
| 8  | 8.43    | 167.50  |
| 9  | 8.05    | 126.14  |
| 10 | 6.90    | 115.22  |
| 11 | 3.75    | 55.86   |

**HMBC**

| #  | F2(ppm) | F1(ppm) |
|----|---------|---------|
| 1  | 6.29    | 115.66  |
| 2  | 6.84    | 131.89  |
| 3  | 8.43    | 94.31   |
| 4  | 7.64    | 130.15  |
| 5  | 7.64    | 117.64  |
| 6  | 7.57    | 117.64  |
| 7  | 6.76    | 117.64  |
| 8  | 6.29    | 120.01  |
| 9  | 6.84    | 127.51  |
| 10 | 7.80    | 146.97  |
| 11 | 8.43    | 147.39  |
| 12 | 6.76    | 147.39  |

**1H-15C****HMBC**

| #  | F2(ppm) | F1(ppm) |
|----|---------|---------|
| 13 | 6.80    | 114.00  |
| 14 | 6.80    | 67.84   |
| 15 | 6.80    | 160.90  |
| 16 | 6.80    | 120.55  |
| 17 | 6.80    | 158.44  |
| 18 | 7.58    | 160.90  |
| 19 | 7.58    | 128.28  |
| 20 | 7.58    | 114.00  |
| 21 | 7.58    | 120.55  |
| 22 | 7.58    | 125.98  |
| 23 | 7.58    | 151.72  |
| 24 | 7.89    | 137.18  |
| 25 | 7.89    | 146.60  |
| 26 | 7.89    | 145.22  |
| 27 | 7.89    | 125.78  |
| 28 | 7.89    | 116.29  |
| 29 | 7.89    | 129.32  |
| 30 | 8.02    | 125.78  |
| 31 | 8.02    | 116.29  |
| 32 | 8.02    | 146.60  |
| 33 | 8.02    | 145.22  |
| 34 | 8.02    | 137.18  |
| 35 | 8.11    | 129.32  |
| 36 | 8.11    | 145.22  |
| 37 | 8.11    | 116.29  |
| 38 | 8.56    | 116.29  |
| 39 | 8.56    | 129.32  |
| 40 | 8.56    | 137.18  |

| # | F2(ppm) | F1(ppm) |
|---|---------|---------|
| 1 | 7.87    | 169.83  |
| 2 | 8.89    | 236.56  |
| 3 | 7.87    | 236.56  |
| 4 | 8.02    | 267.63  |

|    |      |        |
|----|------|--------|
| 13 | 6.84 | 159.28 |
| 14 | 6.29 | 159.28 |
| 15 | 7.67 | 161.68 |
| 16 | 8.43 | 157.24 |
| 17 | 8.05 | 146.97 |
| 18 | 8.05 | 136.46 |
| 19 | 6.90 | 130.94 |
| 20 | 6.90 | 115.22 |
| 21 | 3.75 | 161.68 |
| 22 | 6.90 | 161.68 |
| 23 | 8.43 | 117.64 |
| 24 | 6.84 | 115.66 |
| 25 | 7.80 | 126.14 |
| 26 | 8.05 | 117.64 |
| 27 | 6.29 | 127.51 |
| 28 | 6.29 | 131.89 |
| 29 | 7.57 | 136.46 |
| 30 | 7.64 | 136.46 |
| 31 | 6.76 | 167.50 |

## Top 8 Structural Candidates Generated by ACD/Structure Elucidator Program

| Structures List                                                                    |                                                                                    |                                                                                     |                                                                                      |
|------------------------------------------------------------------------------------|------------------------------------------------------------------------------------|-------------------------------------------------------------------------------------|--------------------------------------------------------------------------------------|
| 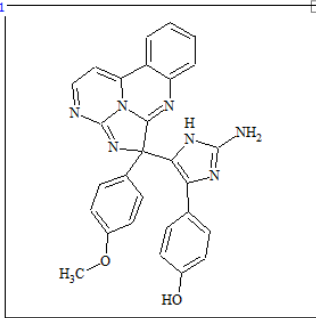  |   |   |   |
| $d_N(^{13}C)$ : 2.727<br>FW: 487.5120<br>Formula: $C_{28}H_{21}N_7O_2$             | $d_N(^{13}C)$ : 2.792<br>FW: 487.5120<br>Formula: $C_{28}H_{21}N_7O_2$             | $d_N(^{13}C)$ : 2.982<br>FW: 487.5120<br>Formula: $C_{28}H_{21}N_7O_2$              | $d_N(^{13}C)$ : 3.008<br>FW: 487.5120<br>Formula: $C_{28}H_{21}N_7O_2$               |
|  |  |  |  |
| $d_N(^{13}C)$ : 3.050<br>FW: 487.5120<br>Formula: $C_{28}H_{21}N_7O_2$             | $d_N(^{13}C)$ : 3.090<br>FW: 487.5120<br>Formula: $C_{28}H_{21}N_7O_2$             | $d_N(^{13}C)$ : 3.090<br>FW: 487.5120<br>Formula: $C_{28}H_{21}N_7O_2$              | $d_N(^{13}C)$ : 3.098<br>FW: 487.5120<br>Formula: $C_{28}H_{21}N_7O_2$               |

Top 8 candidates generated by ACD/Structure Elucidator. Structure ranking is based on the overall differences between experimental and predicted  $^{13}C$  chemical shifts. The lower the  $d_N(^{13}C)$  value, the better the ranking.

### Isomers Generated and Time Difference for ACD/Structure Elucidator With and Without the LR-HSQMBC data.

|                          | With LR-HSQMBC* | W/out LR-HSQMBC* |
|--------------------------|-----------------|------------------|
| <b>Isomers Generated</b> | 35,928          | 267,468          |
| <b>Post-filter</b>       | 335             | 419              |
| <b>Time (seconds)</b>    | 35              | 247              |
| <b>Top Candidate</b>     | 1               | 1                |

\*Data also includes: molecular formula + NMR ( $^1H$ ,  $^{13}C$ , HSQC, COSY,  $^1H$ - $^{13}C$  HMBC,  $^1H$ - $^{15}N$  HMBC)



## Long-Range LR-HSQMBC Correlations Observed for Eudistidine C (1)

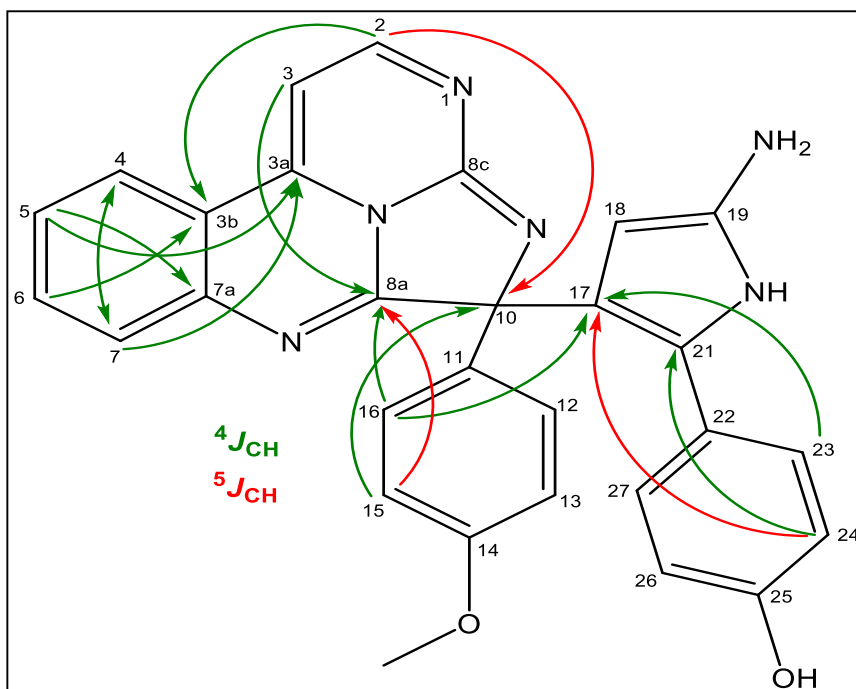

Four-bond (green arrows) and five-bond (red arrows) carbon-proton correlations observed in a 2 Hz optimized LR-HSQMBC experiment digitized with 768 F1 increments.

## LR-HSQMBC Spectrum of Eudistidine C (1)

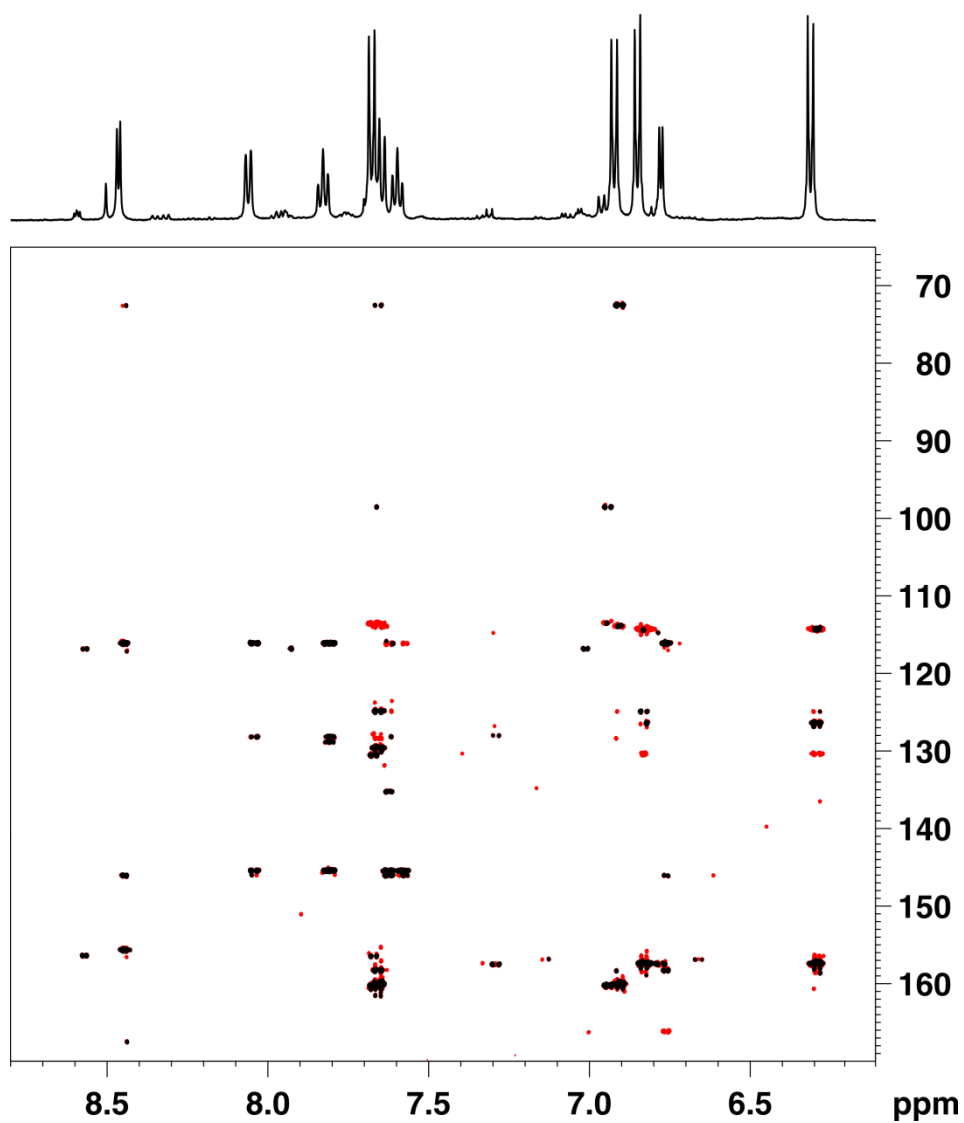

2 Hz LR-HSQMBC on eudistidine C (1) natural product (CD<sub>3</sub>OD). Data were acquired using 3072 × 768 points with 26 transients accumulated per each  $t_1$  increment giving an overall acquisition time of 15 h 30 min. Data were processed by linear prediction to 1536 points in F1. Prior to Fourier transformation, zero-filling to 4096 points in F2 and 2048 points in F1 were applied and a shifted squared sine bell apodization function was used.

**<sup>13</sup>C NMR Chemical Shift Comparison of Eudistidine C Natural Product vs Synthetic Eudistidine C**

| <b>position</b> | <b>Natural Product</b>             | <b>Synthetic Free Base</b> | <b>Synthetic TFA</b> |
|-----------------|------------------------------------|----------------------------|----------------------|
|                 | <b><math>\delta_c</math> (ppm)</b> |                            | <b>Salt</b>          |
| 2               | 167.5                              | 167.5                      | 167.4                |
| 3               | 94.3                               | 94.4                       | 101.8                |
| 3a              | 147.4                              | 147.5                      | 147.8                |
| 3b              | 117.6                              | 117.8                      | 117.6                |
| 4               | 126.1                              | 126.2                      | 127.2                |
| 5               | 130.2                              | 130.2                      | 132.0                |
| 6               | 136.5                              | 136.5                      | 138.4                |
| 7               | 129.7                              | 129.8                      | 130.7                |
| 7a              | 147.0                              | 147.1                      | 146.7                |
| 8a              | 159.5                              | 159.5                      | 153.6                |
| 8c              | 157.3                              | 157.4                      | 155.0                |
| 10              | 73.7                               | 73.7                       | 69.6 (hmbc)          |
| 11              | 130.9                              | 130.8                      | 127.7                |
| 12/16           | 129.8                              | 129.8                      | 129.7                |
| 13/15           | 115.2                              | 115.2                      | 115.6                |
| 14              | 161.7                              | 161.7                      | 162.4                |
| 14-OMe          | 55.8                               | 55.8                       | 55.6                 |
| 17              | 126.1                              | 125.8                      | 122.7                |
| 19              | 148.0                              | 148.1                      | 148.4                |
| 21              | 127.5                              | 127.5                      | 129.0                |
| 22              | 120.0                              | 119.9                      | 118.4                |
| 23/27           | 131.9                              | 131.9                      | 132.1                |
| 24/26           | 115.7                              | 115.7                      | 115.6                |
| 25              | 159.3                              | 159.3                      | 159.9                |

**<sup>1</sup>H NMR Chemical Shift Comparison of Eudistidine C Natural Product vs Synthetic Eudistidine C**

| <b>position</b> | <b>Natural Product</b>                      | <b>Synthetic Free</b> | <b>Synthetic TFA</b> |
|-----------------|---------------------------------------------|-----------------------|----------------------|
|                 | <b><math>\delta_{\text{H}}</math> (ppm)</b> | <b>Base</b>           | <b>Salt</b>          |
| 2               | 8.45                                        | 8.48                  | 8.90                 |
| 3               | 6.77                                        | 6.83                  | 7.78                 |
| 4               | 8.06                                        | 8.13                  | 8.55                 |
| 5               | 7.58                                        | 7.63                  | 7.92                 |
| 6               | 7.81                                        | 7.85                  | 8.13                 |
| 7               | 7.65                                        | 7.69                  | 8.03                 |
| 12/16           | 7.68                                        | 7.69                  | 7.67                 |
| 13/15           | 6.91                                        | 6.90                  | 6.93                 |
| 14-OMe          | 3.76                                        | 3.76                  | 3.77                 |
| 23/27           | 6.85                                        | 6.87                  | 6.86                 |
| 24/26           | 6.30                                        | 6.32                  | 6.35                 |

# Chiral Resolution of Eudistidine C (1) Natural Product

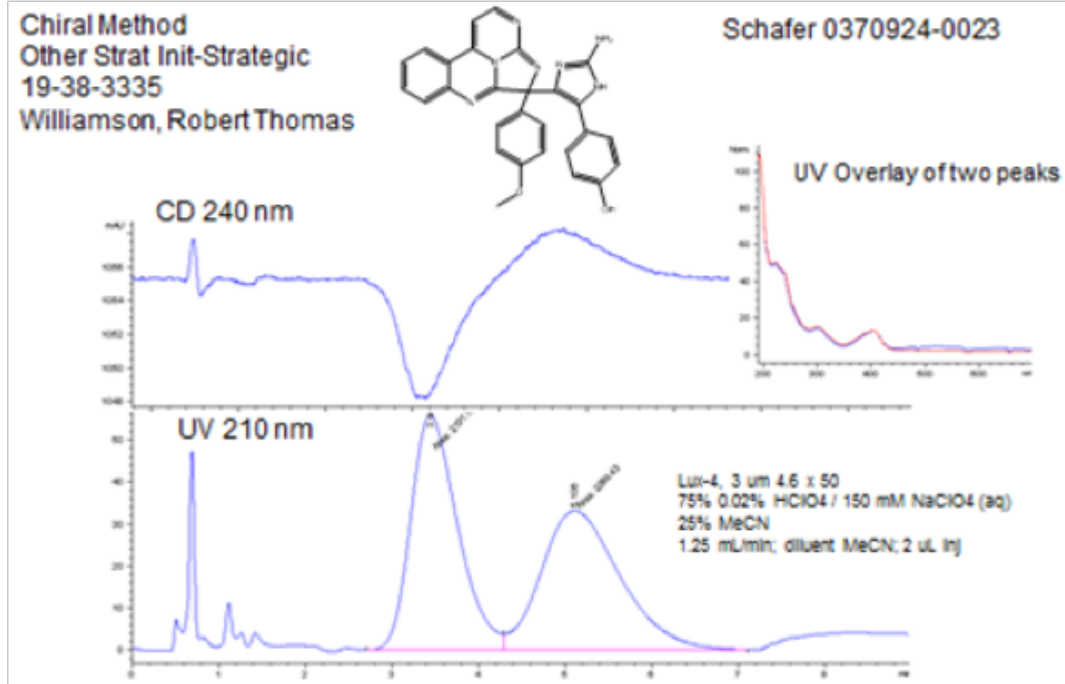

## Preparative Chiral Separation of Synthetic Eudistidine C (1)

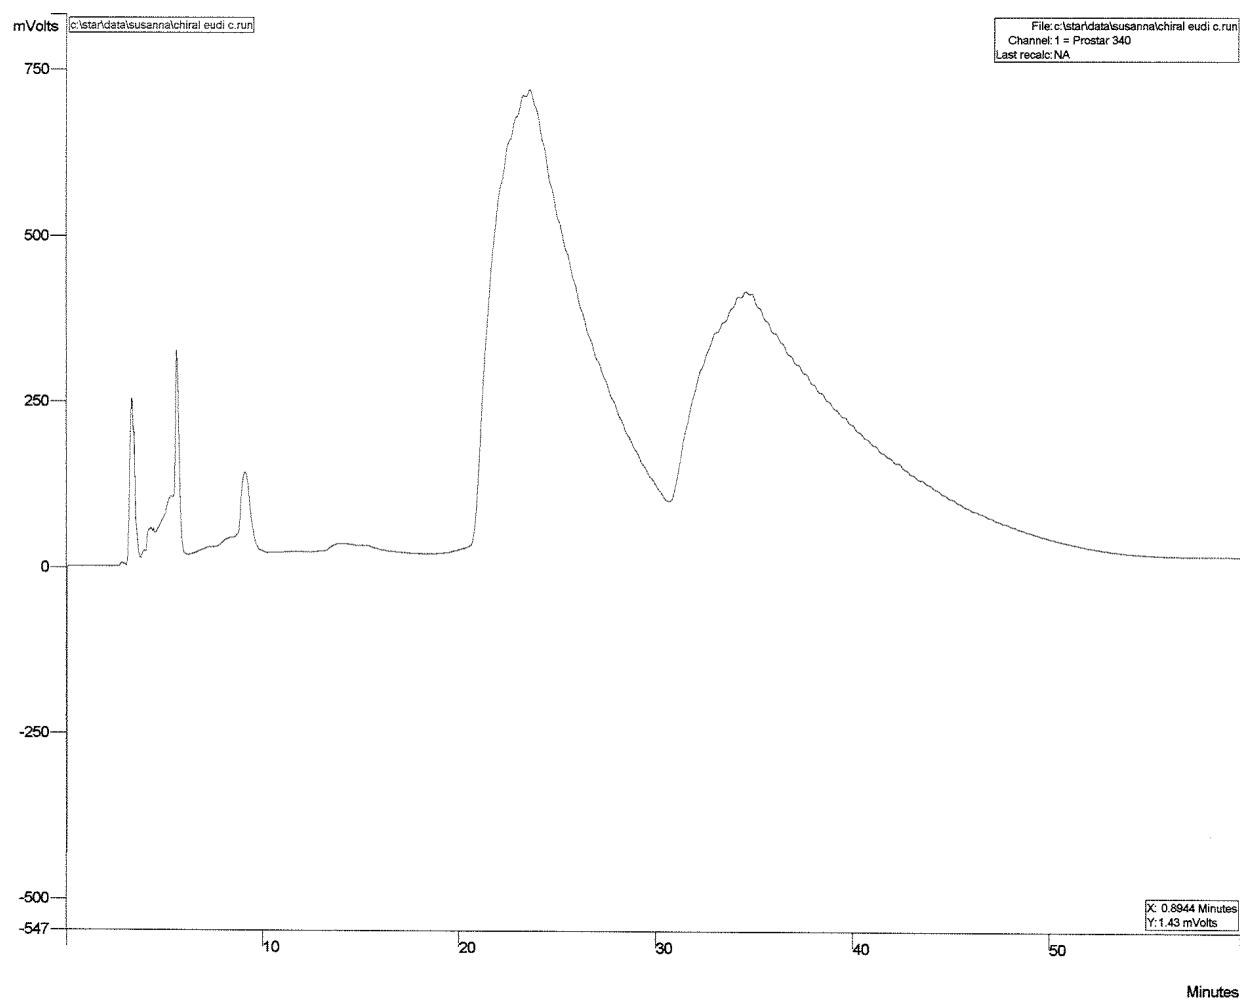

The two enantiomers were separated using a Phenomenex Lux 4 column (5  $\mu$ m, 250 x 10 mm) employing an isocratic gradient of 25% MeCN / 75% 150 mM NaClO<sub>4</sub> (0.02% HClO<sub>4</sub>) over 53 mins affording (+)-*R*-eudistidine C (**1a**) [7.8 mg,  $[\alpha]_D +132.6$  (c 0.1, MeOH)], and (-)-*S*-eudistidine C (**1b**) [7.7 mg,  $[\alpha]_D -148.5$  (c 0.1, MeOH)].

**Experimental ECD Spectra for (+)-*R*-Eudistidine C (1a) and (-)-*S*-Eudistidine C (1b)**

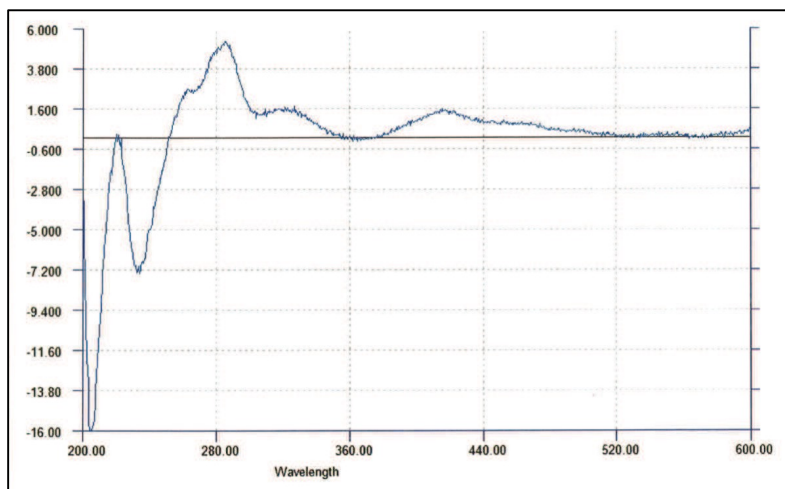

**(+)-*R*-Eudistidine C (1a)**

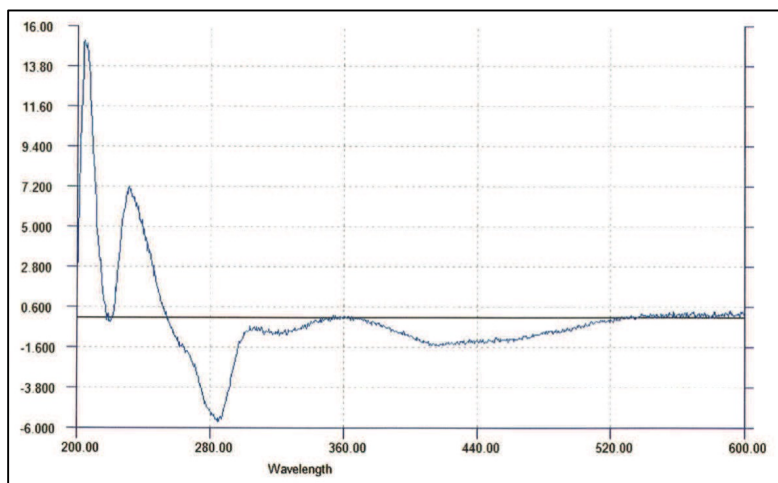

**(-)-*S*-Eudistidine C (1b)**

## Conformational Analysis and ECD Calculation for (+)-*R*-Eudistidine C (1b)

# Conformational Analysis and ECD Calculation

**Chemical Structure of (*R*)-Eudistidine C:**

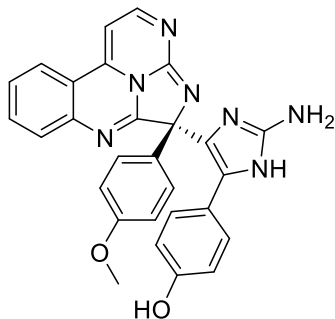

**Global Minimum (*R*)-Eudistidine C:**

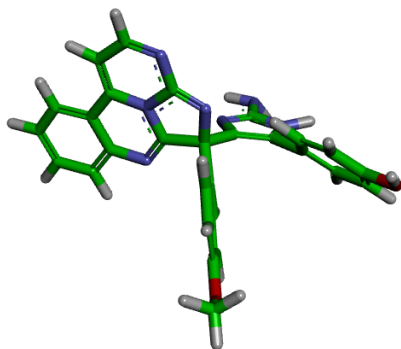

**ECD Comparison:**

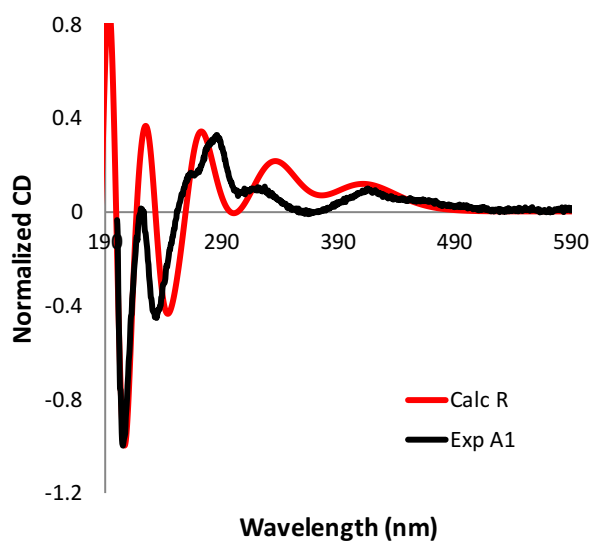

**Correlation between experimental peak A1 and the calculated (*R*)-Eudistidine C as a free-base**



### p300/HIF-1 $\alpha$ Assay

Inhibition of HIF-1 $\alpha$  binding to p300 was measured by displacement of GST-p300-CH1 (aa 323–423) from synthetic biotinylated HIF-1 $\alpha$  C-TAD (aa 786–826; Peptide Protein Research Ltd., Fareham, UK) immobilized on 384-well streptavidin-coated plates. Bound GST-CH1 was detected using a Europium-labeled antibody to GST (PerkinElmer Life Sciences). 48.5 nM HIF-1 $\alpha$  C-TAD was used to coat plates for 5 h at room temperature. Plates were washed four times with TBST (50 mM Tris, 150 mM NaCl, 0.05% Tween 20, pH 8.0) buffer. 7.35 nM GST-CH1 was added with along with the test compounds or control (1% DMSO) in TBST with 5% BSA, 0.5 mM DTT, and 10  $\mu$ M ZnCl<sub>2</sub> and incubated overnight at 24 °C. Plates were washed four times with TBST, and Europium-labeled anti-GST (450 ng/mL) was added to plates in the same buffer used for GST-CH1 addition. After 2 h, plates were washed four times in TBST. DELFIA enhancement solution (PerkinElmer Life Sciences) was added and plates were placed on a rocker for 30 min, before reading with a Victor3 plate reader (PerkinElmer Life Sciences) or a Pherastar Plate Reader (BMG Labtech), using the Europium setting under time-resolved fluorescence. Values were corrected for background and expressed as a percentage of controls (DMSO) to provide the percentage of CH1 binding.

#### p300/ HIF-1 $\alpha$ assay results

| Compound  | IC <sub>50</sub> ( $\mu$ M) |
|-----------|-----------------------------|
| <b>1a</b> | n.a.                        |
| <b>1b</b> | 276                         |
| <b>5</b>  | 314                         |
| <b>6</b>  | 399                         |
| <b>7</b>  | 356                         |
| <b>8</b>  | n.a.                        |
| <b>9</b>  | n.a.                        |
| <b>10</b> | 141                         |

n.a. = not active (IC<sub>50</sub> > 500  $\mu$ M)

## Antimalarial Screening Assay

The antimalarial activity was determined against chloroquine sensitive (D6) and chloroquine resistant (W2) strains of *Plasmodium falciparum* by measuring plasmodial lactate dehydrogenase (LDH) activity according to the procedure of Makler and Hinrichs.<sup>5</sup> A suspension of red blood cells infected with the D6 or W2 strain of *P. falciparum* (200  $\mu$ L, with 2% parasitemia and 2% hematocrit in RPMI 1640 medium supplemented with 10% human serum and 60  $\mu$ g/mL Amikacin) was added to the wells of a 96-well plate containing 10  $\mu$ L of serially diluted test samples. The plate was incubated at 37 °C, for 72 h in an environment of 90% N<sub>2</sub>, 5% O<sub>2</sub>, and 5% CO<sub>2</sub>. Plasmodial LDH activity was determined by mixing 20  $\mu$ L of the incubation mixture with 100  $\mu$ L of the Malstat reagent and incubating at room temperature for 30 min. Twenty microliters of a 1:1 mixture of NBT/PES (Sigma, St. Louis, MO) was added and the plate was further incubated in the dark for 1 h. The reaction was then stopped by adding 100  $\mu$ L of a 5% acetic acid solution and the absorbance was read at 650 nm. Artemisinin and chloroquine were included as the drug controls. The *in vitro* cytotoxicity of samples to mammalian cells was also tested in order to determine the selectivity index of the antimalarial activity. Vero cells (monkey kidney fibroblasts) were seeded into a 96-well plate at a density of 25,000 cells/well and grown for 24 h. Test samples at different concentrations were added and cells were further incubated for 48 h. Cell viability was determined by the Neutral Red method.<sup>6</sup> Doxorubicin was included as the drug control. IC<sub>50</sub> values were obtained from the dose response curves.

(5) Makler, M. T.; Hinrichs, D. J. *Am. J. Trop. Med. Hyg.* **1993**, *48*, 205-210.

(6) Borenfreund, E.; Babich, H.; Martin-Alguacil, N. *In vitro Cell. Dev. Biol.* **1990**, *26*, 1030-1034.

### *Antimalarial activity against P. falciparum and cytotoxicity towards Vero cells*

| Compound  | D6 strain IC <sub>50</sub> ( $\mu$ M) | W2 strain IC <sub>50</sub> ( $\mu$ M) | Cytotoxicity |
|-----------|---------------------------------------|---------------------------------------|--------------|
| <b>1a</b> | 2.8                                   | 1.5                                   | n.c.         |
| <b>1b</b> | 4.2                                   | 2.5                                   | n.c.         |
| <b>2</b>  | 1.4                                   | 1.1                                   | n.c.         |
| <b>6</b>  | n.a.                                  | 7.5                                   | n.c.         |
| <b>7</b>  | 2.4                                   | 1.0                                   | n.c.         |
| <b>8</b>  | 5.8                                   | 3.6                                   | n.c.         |
| <b>9</b>  | 6.6                                   | 5.6                                   | n.c.         |
| <b>10</b> | 1.1                                   | 0.6                                   | n.c.         |

n.a. = not active; n.c. = no cytotoxicity

## Molecular Model of Eudistidine C (1)

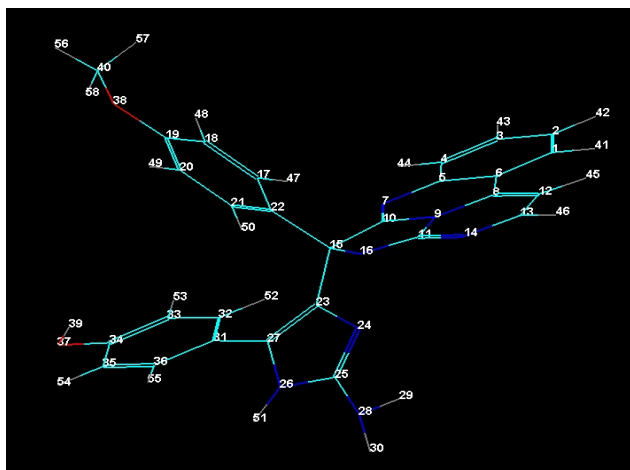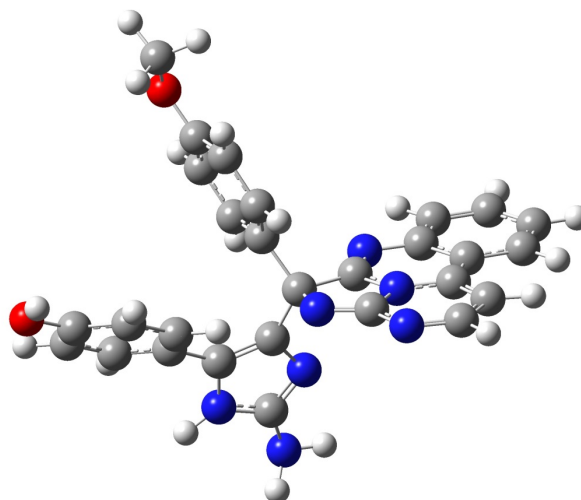

## Atomic coordinates of molecular model of eudistidine C (1)

|   |             |             |             |
|---|-------------|-------------|-------------|
| C | 5.78711400  | 0.53043200  | 0.08790200  |
| C | 6.41643500  | 0.91459600  | -1.08542500 |
| C | 5.65741200  | 1.13112500  | -2.25189800 |
| C | 4.28240700  | 0.96097400  | -2.23781200 |
| C | 3.61860600  | 0.56721300  | -1.05735500 |
| C | 4.38974800  | 0.35102700  | 0.12541300  |
| N | 2.23706200  | 0.40977600  | -1.11346600 |
| C | 3.68586300  | -0.03484800 | 1.33411200  |
| N | 2.33524100  | -0.17057000 | 1.15805100  |
| C | 1.66580000  | 0.03424900  | -0.02226600 |
| C | 1.39466600  | -0.50177600 | 2.18408000  |
| C | 4.14067800  | -0.27542700 | 2.62031300  |
| C | 3.17712000  | -0.62072500 | 3.60893800  |
| N | 1.87300800  | -0.73590000 | 3.44373900  |
| C | 0.18278000  | -0.24674900 | 0.30002600  |
| N | 0.17607600  | -0.52219700 | 1.76231600  |
| C | -1.08420900 | 1.87582000  | 0.94066100  |
| C | -1.80182500 | 3.03517200  | 0.61922600  |
| C | -2.08898400 | 3.32107100  | -0.71922800 |
| C | -1.65202900 | 2.44336800  | -1.72390500 |
| C | -0.94319000 | 1.29703600  | -1.38928700 |
| C | -0.65393100 | 0.99236400  | -0.04868700 |
| C | -0.24848500 | -1.51187100 | -0.42718900 |
| N | 0.71560800  | -2.36313100 | -0.94575400 |
| C | 0.05901600  | -3.38155300 | -1.45437900 |
| N | -1.28672500 | -3.23795900 | -1.28883700 |
| C | -1.51279900 | -2.04179100 | -0.59902200 |
| N | 0.61585700  | -4.44845100 | -2.15963200 |

|   |             |             |             |
|---|-------------|-------------|-------------|
| H | 1.62536300  | -4.36048400 | -2.18659400 |
| H | 0.35123500  | -5.36425700 | -1.81139400 |
| C | -2.86810300 | -1.65014000 | -0.19509400 |
| C | -3.11729600 | -1.11435900 | 1.08034300  |
| C | -4.41113500 | -0.76912800 | 1.46818900  |
| C | -5.48516100 | -0.96730200 | 0.59453700  |
| C | -5.25970600 | -1.50579800 | -0.67615100 |
| C | -3.96310000 | -1.83625200 | -1.06151500 |
| O | -6.77874000 | -0.65339700 | 0.92785300  |
| O | -2.78406300 | 4.41964900  | -1.14900600 |
| H | -6.80521800 | -0.28166400 | 1.81934600  |
| C | -3.25590400 | 5.34366400  | -0.17825100 |
| H | 6.37291300  | 0.36522900  | 0.98657600  |
| H | 7.49341500  | 1.04902500  | -1.10422200 |
| H | 6.15407100  | 1.43338200  | -3.16922400 |
| H | 3.67963700  | 1.12115700  | -3.12545200 |
| H | 5.18793100  | -0.20133300 | 2.87863900  |
| H | 3.53463400  | -0.81134300 | 4.62067900  |
| H | -0.87399500 | 1.64879700  | 1.98024100  |
| H | -2.12875600 | 3.69151300  | 1.41715400  |
| H | -1.88126900 | 2.67903000  | -2.75823900 |
| H | -0.60825400 | 0.62955600  | -2.17641400 |
| H | -2.00270400 | -3.87859000 | -1.59763000 |
| H | -2.29001400 | -0.97917200 | 1.76966600  |
| H | -4.58429300 | -0.35601200 | 2.46001800  |
| H | -6.09907600 | -1.64301200 | -1.35003500 |
| H | -3.79766000 | -2.21798800 | -2.06606400 |
| H | -3.77342300 | 6.12500500  | -0.73661200 |
| H | -2.42744200 | 5.78895000  | 0.38746800  |
| H | -3.95829600 | 4.86884800  | 0.51875200  |

**Eudistidine C (1)  $^1\text{H}$  NMR Spectrum (600 MHz,  $\text{CD}_3\text{OD}$ )**

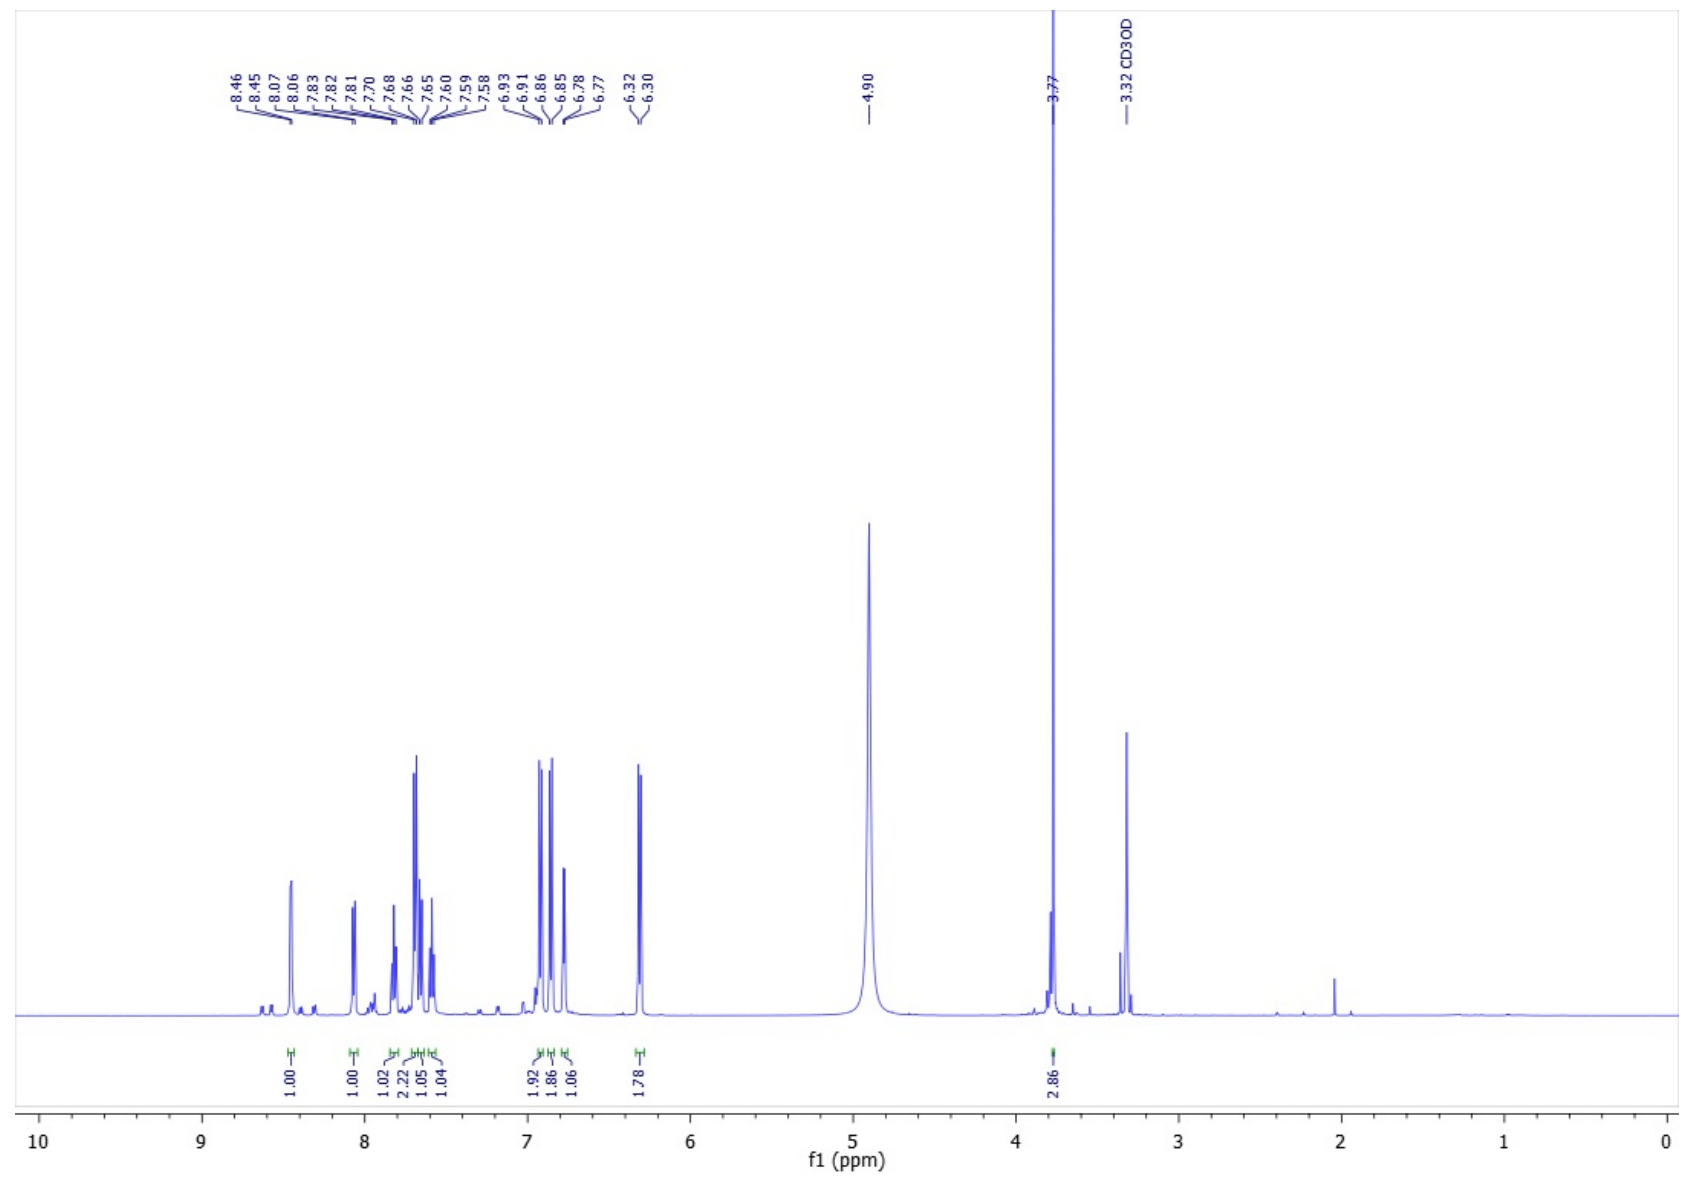

**Eudistidine C (1)  $^{13}\text{C}$  NMR Spectrum (150 MHz,  $\text{CD}_3\text{OD}$ )**

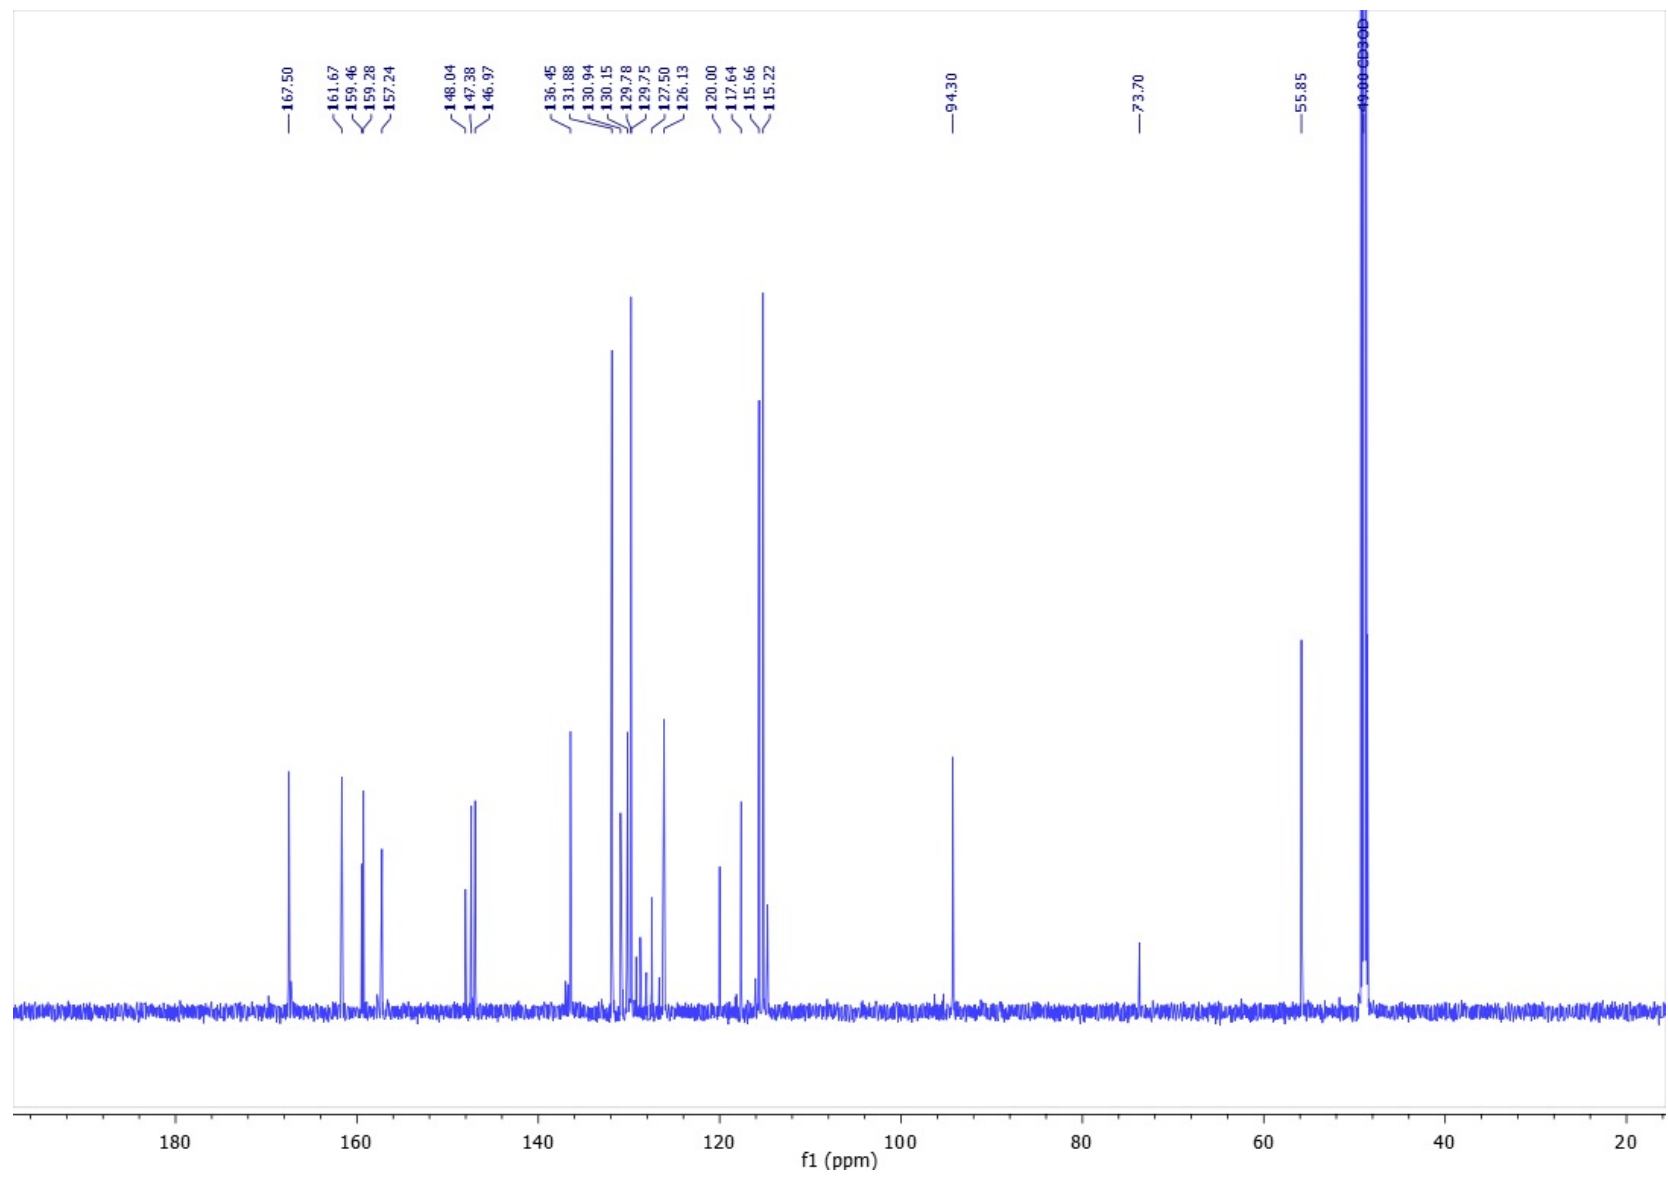



# Eudistidine C (1) HSQC Spectrum (CD<sub>3</sub>OD)

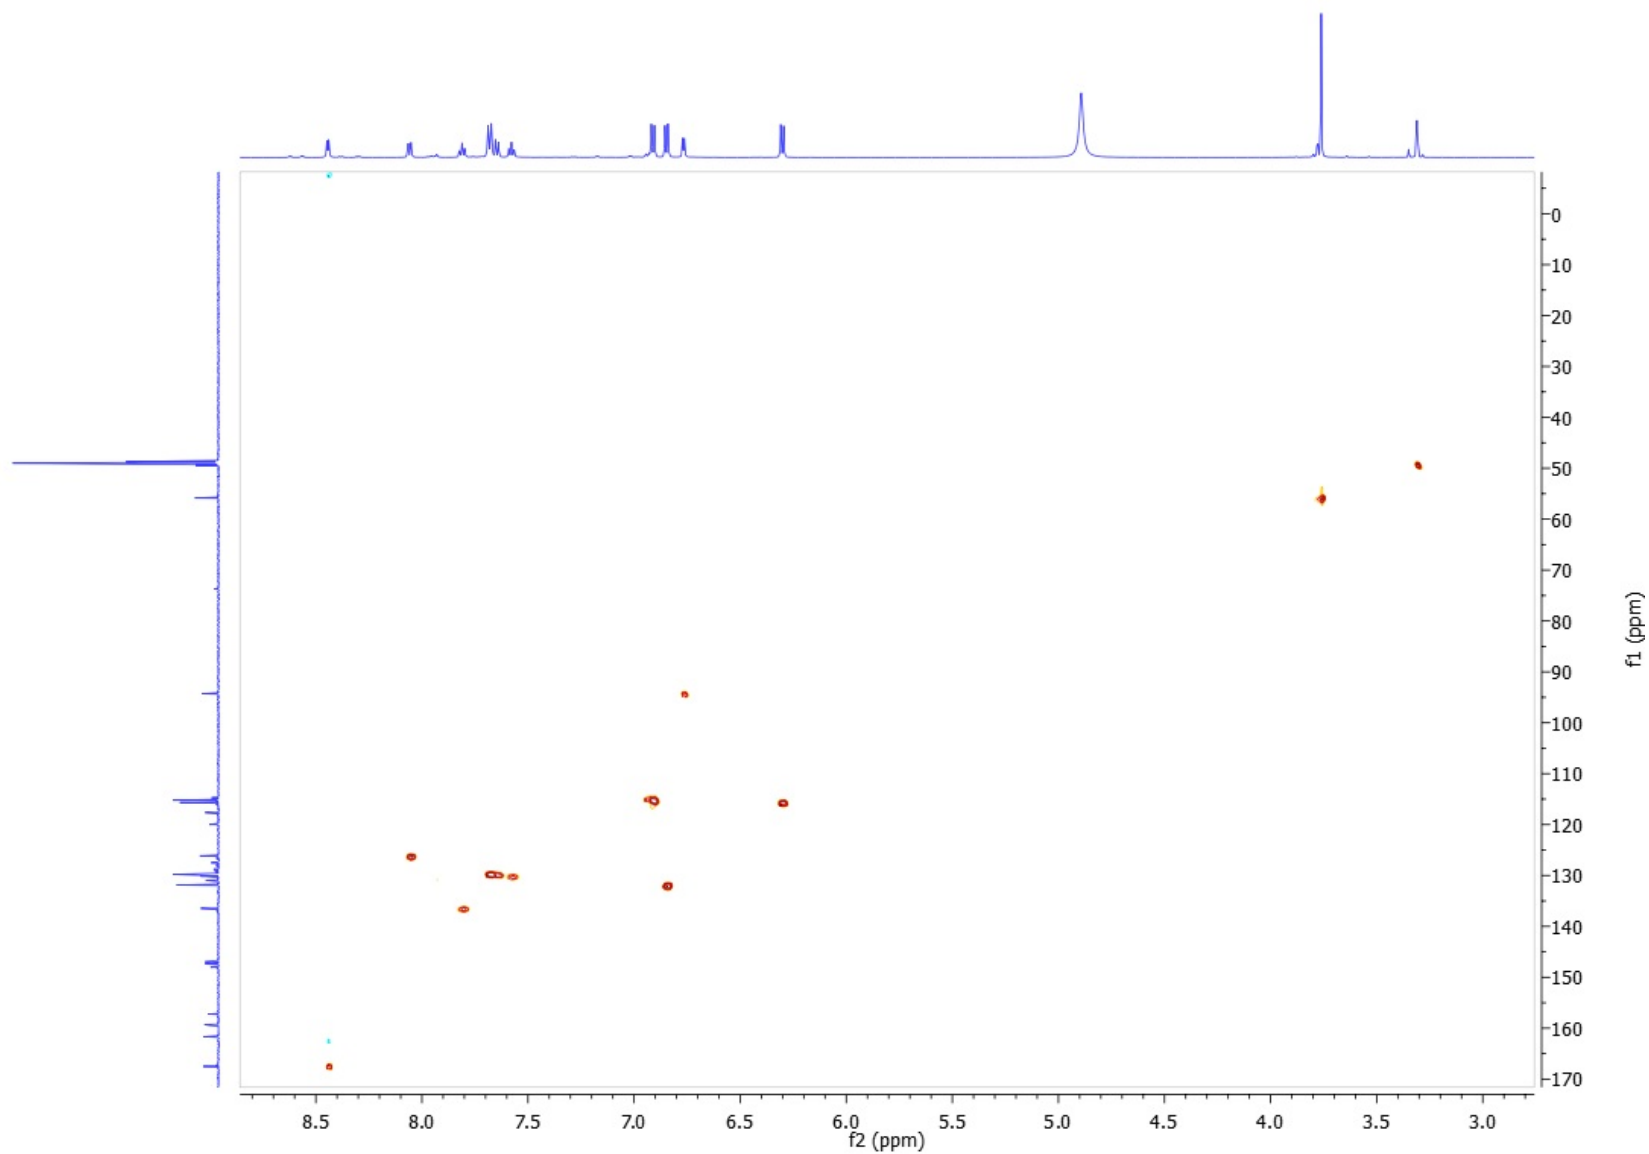



**Eudistidine C (1) HMBC Spectrum (CD<sub>3</sub>OD)**

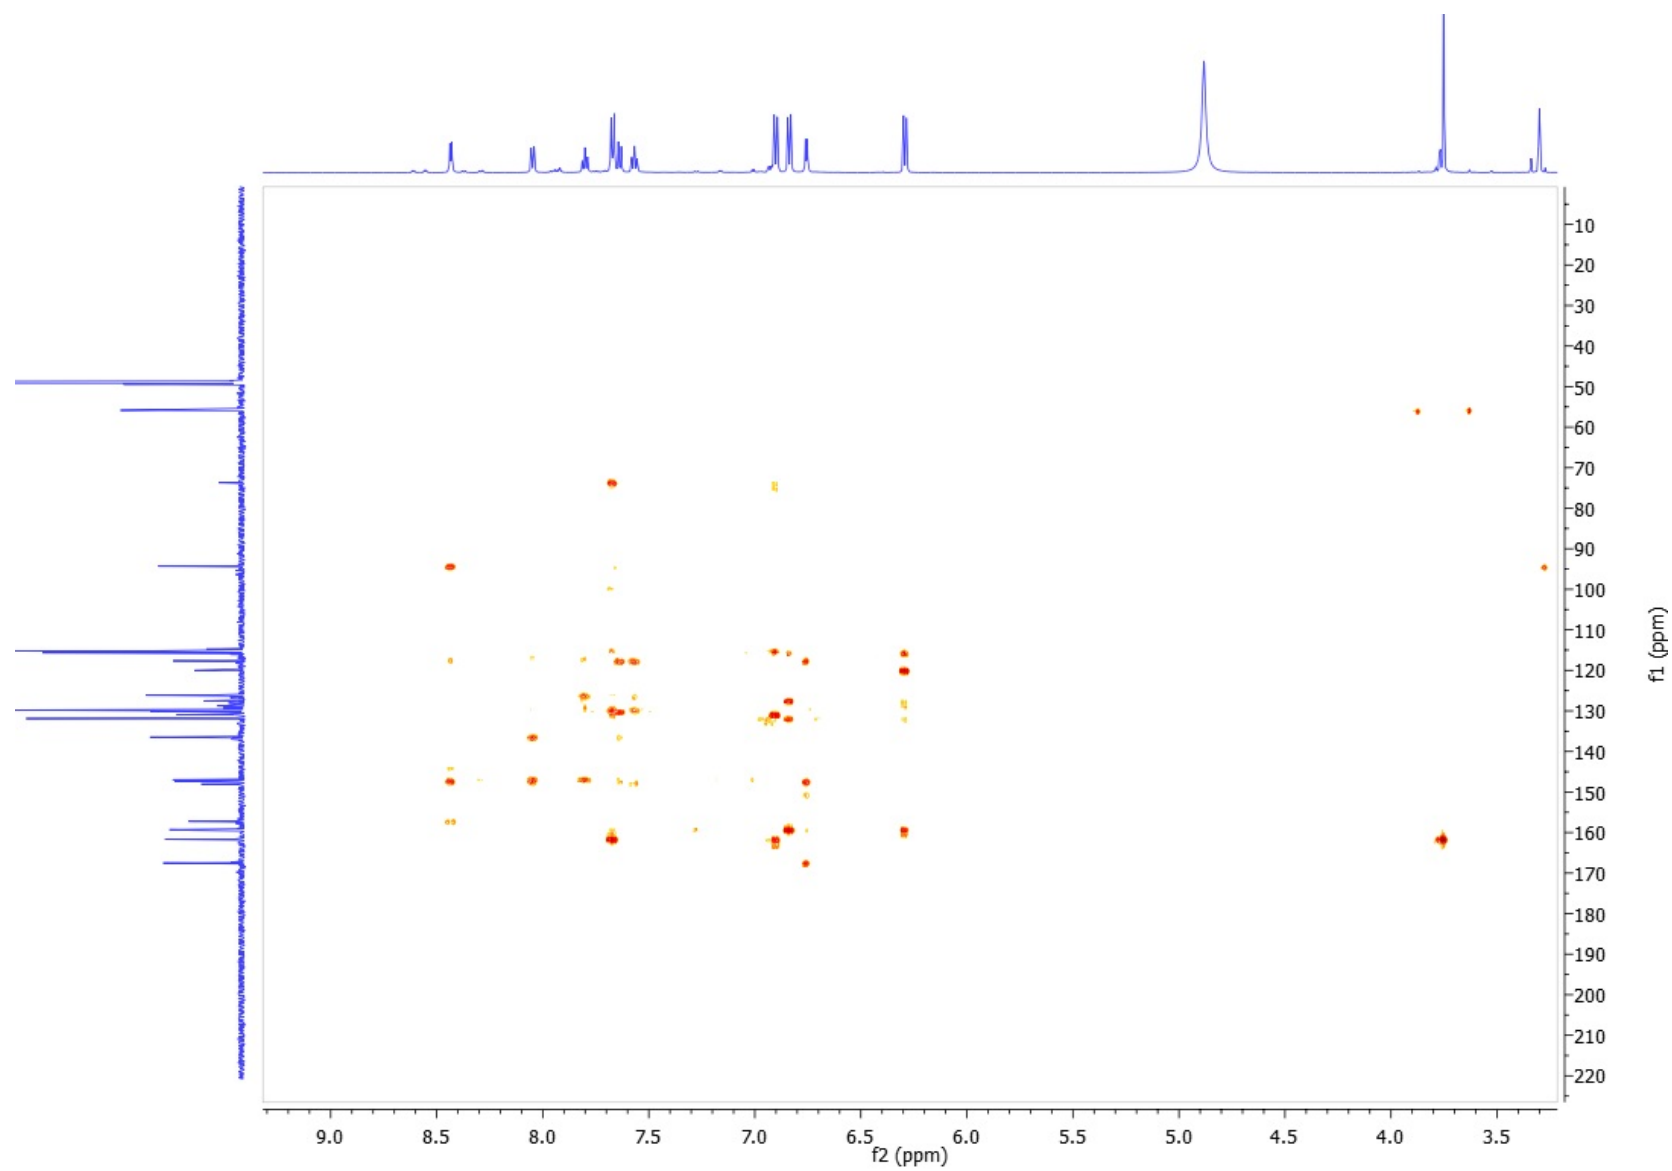

**Eudistidine C (1)  $^{15}\text{N}$ - $^1\text{H}$  HMBC Spectrum ( $\text{CD}_3\text{OD}$ )**

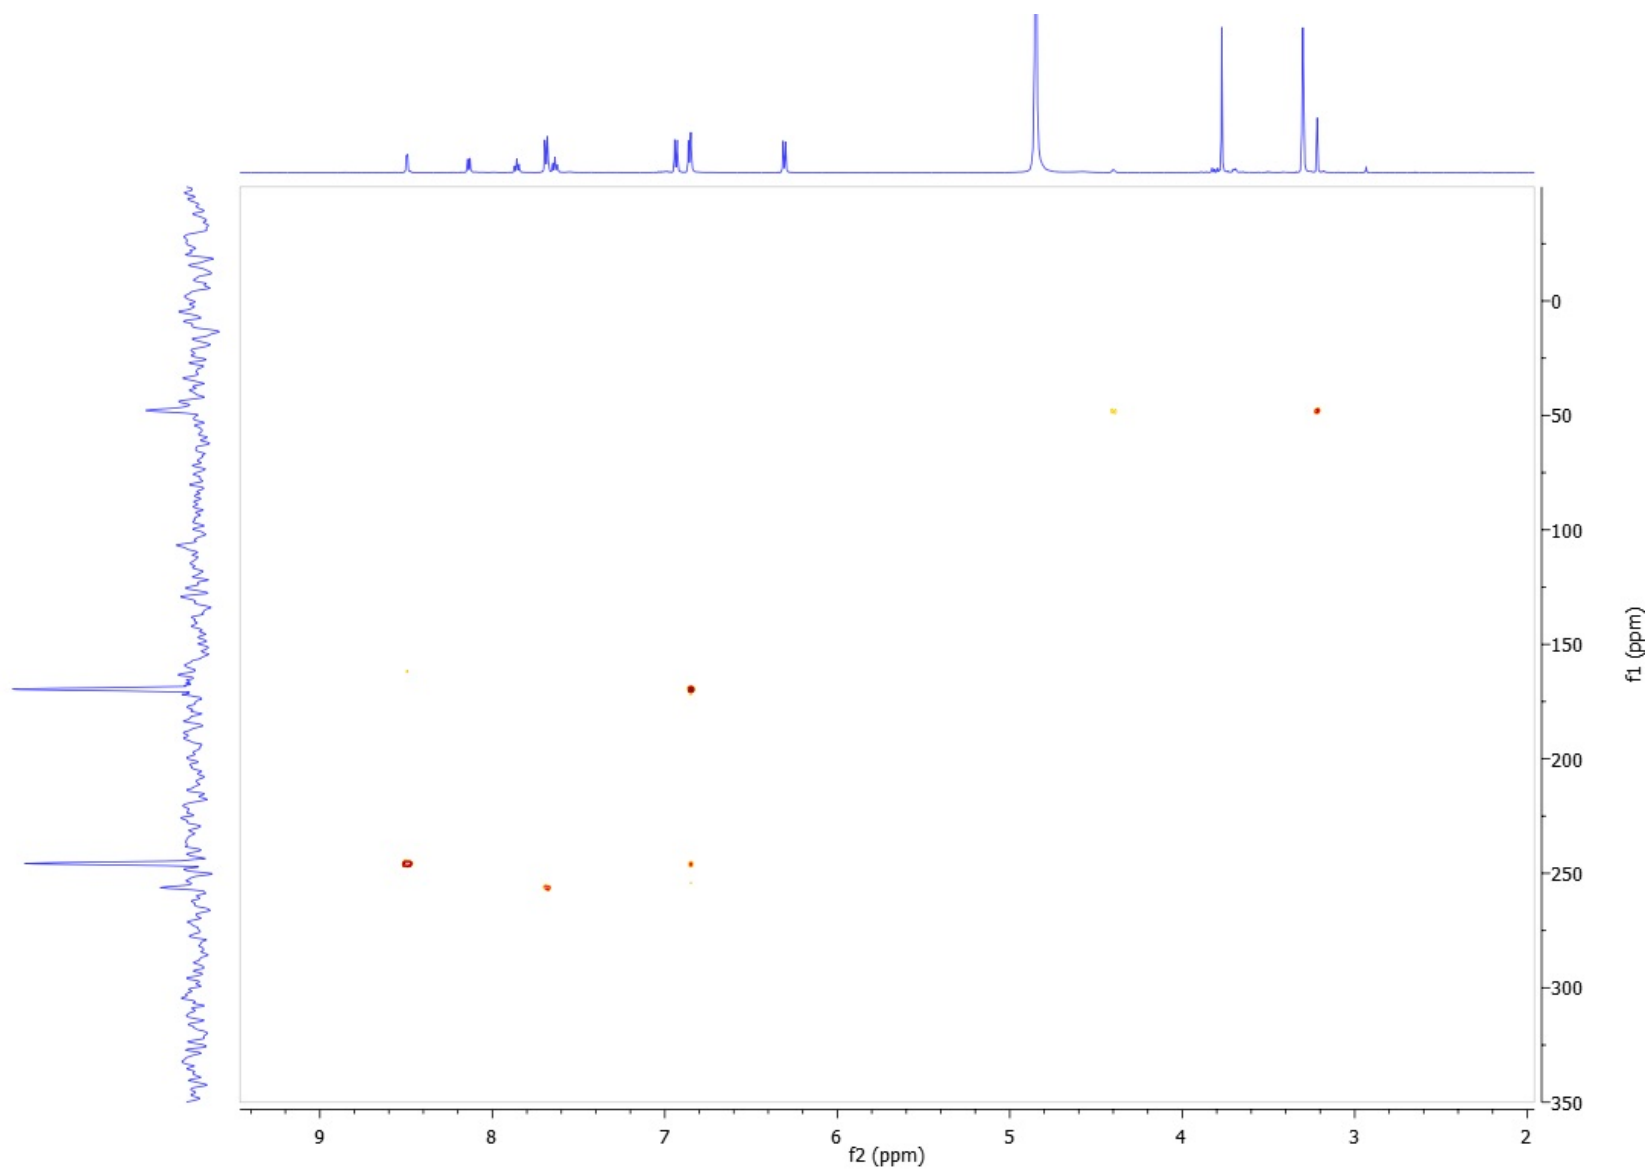

Synthetic Eudistidine C (1) Free Base  $^1\text{H}$  NMR Spectrum (600 MHz,  $\text{CD}_3\text{OD}$ )

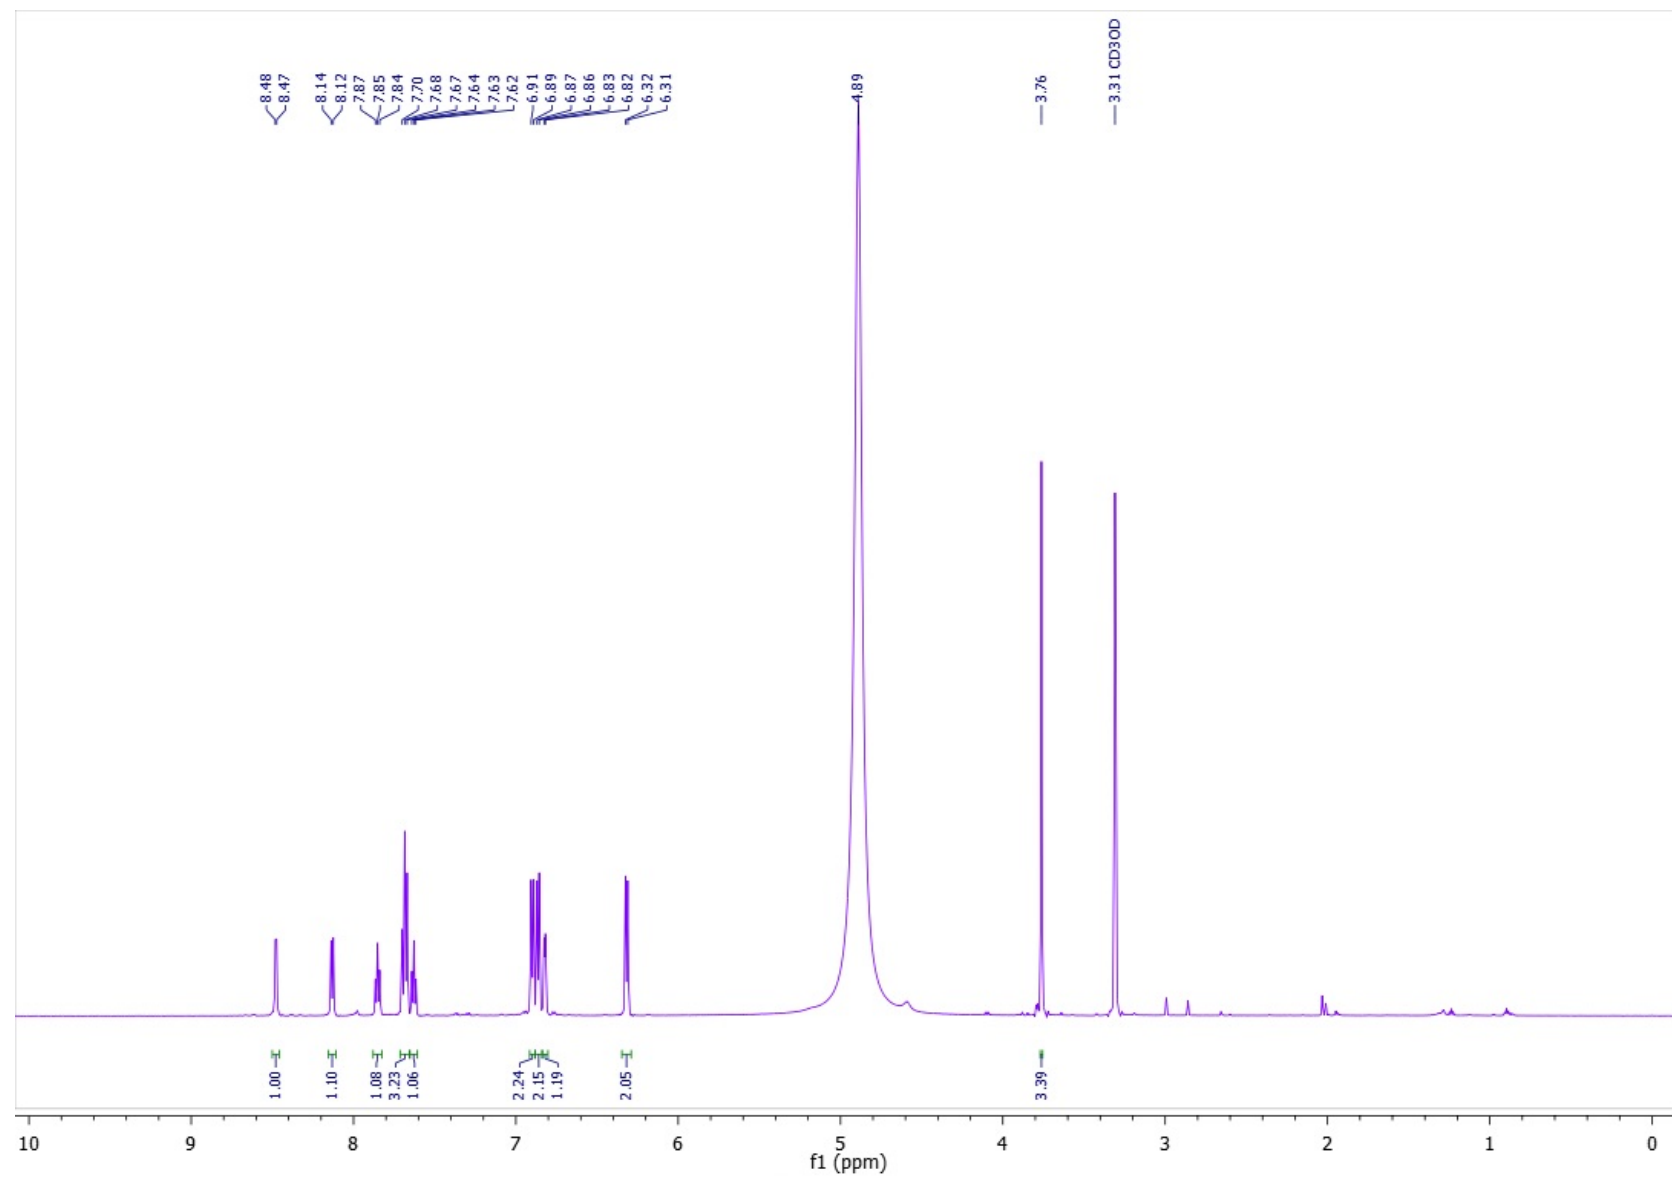

Synthetic Eudistidine C (1) Free Base  $^{13}\text{C}$  NMR Spectrum (150 MHz,  $\text{CD}_3\text{OD}$ )

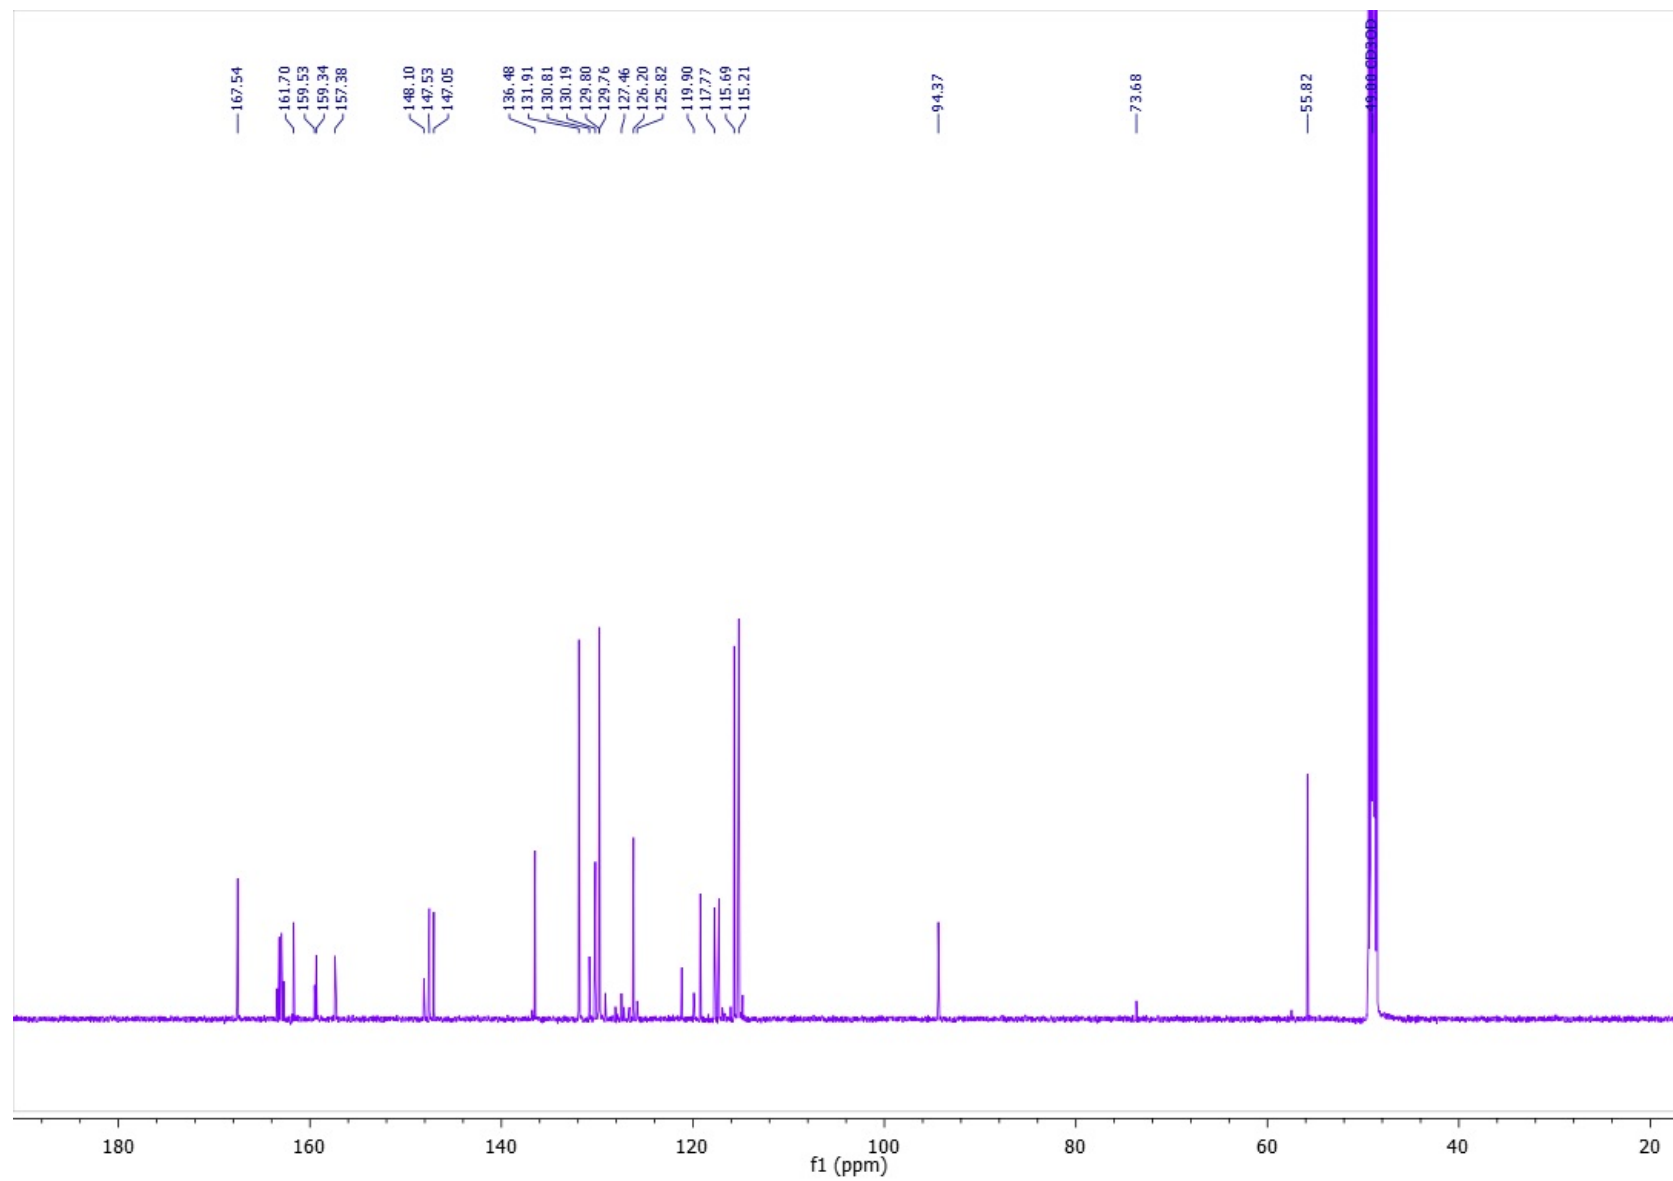

Synthetic Eudistidine C (1) TFA Salt  $^1\text{H}$  NMR Spectrum (600 MHz,  $\text{CD}_3\text{OD}$ )

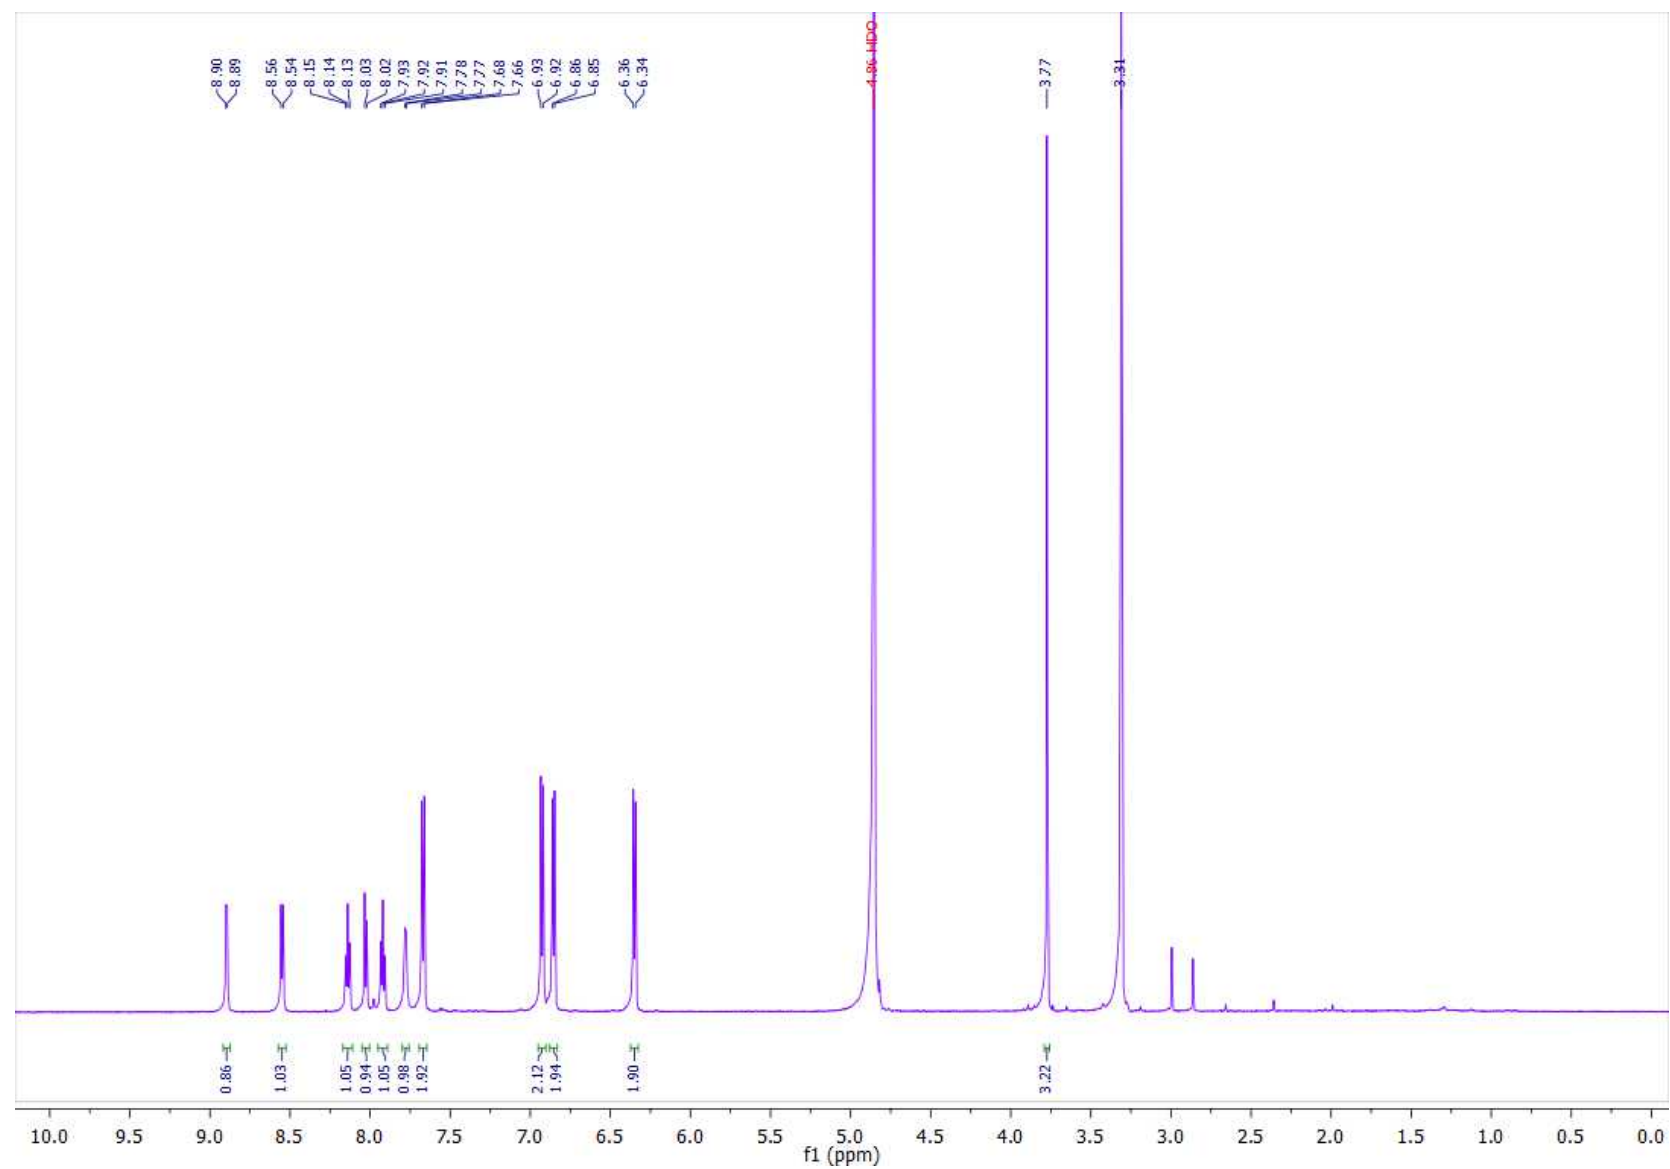

Synthetic Eudistidine C (1) TFA Salt  $^{13}\text{C}$  NMR Spectrum (150 MHz,  $\text{CD}_3\text{OD}$ )

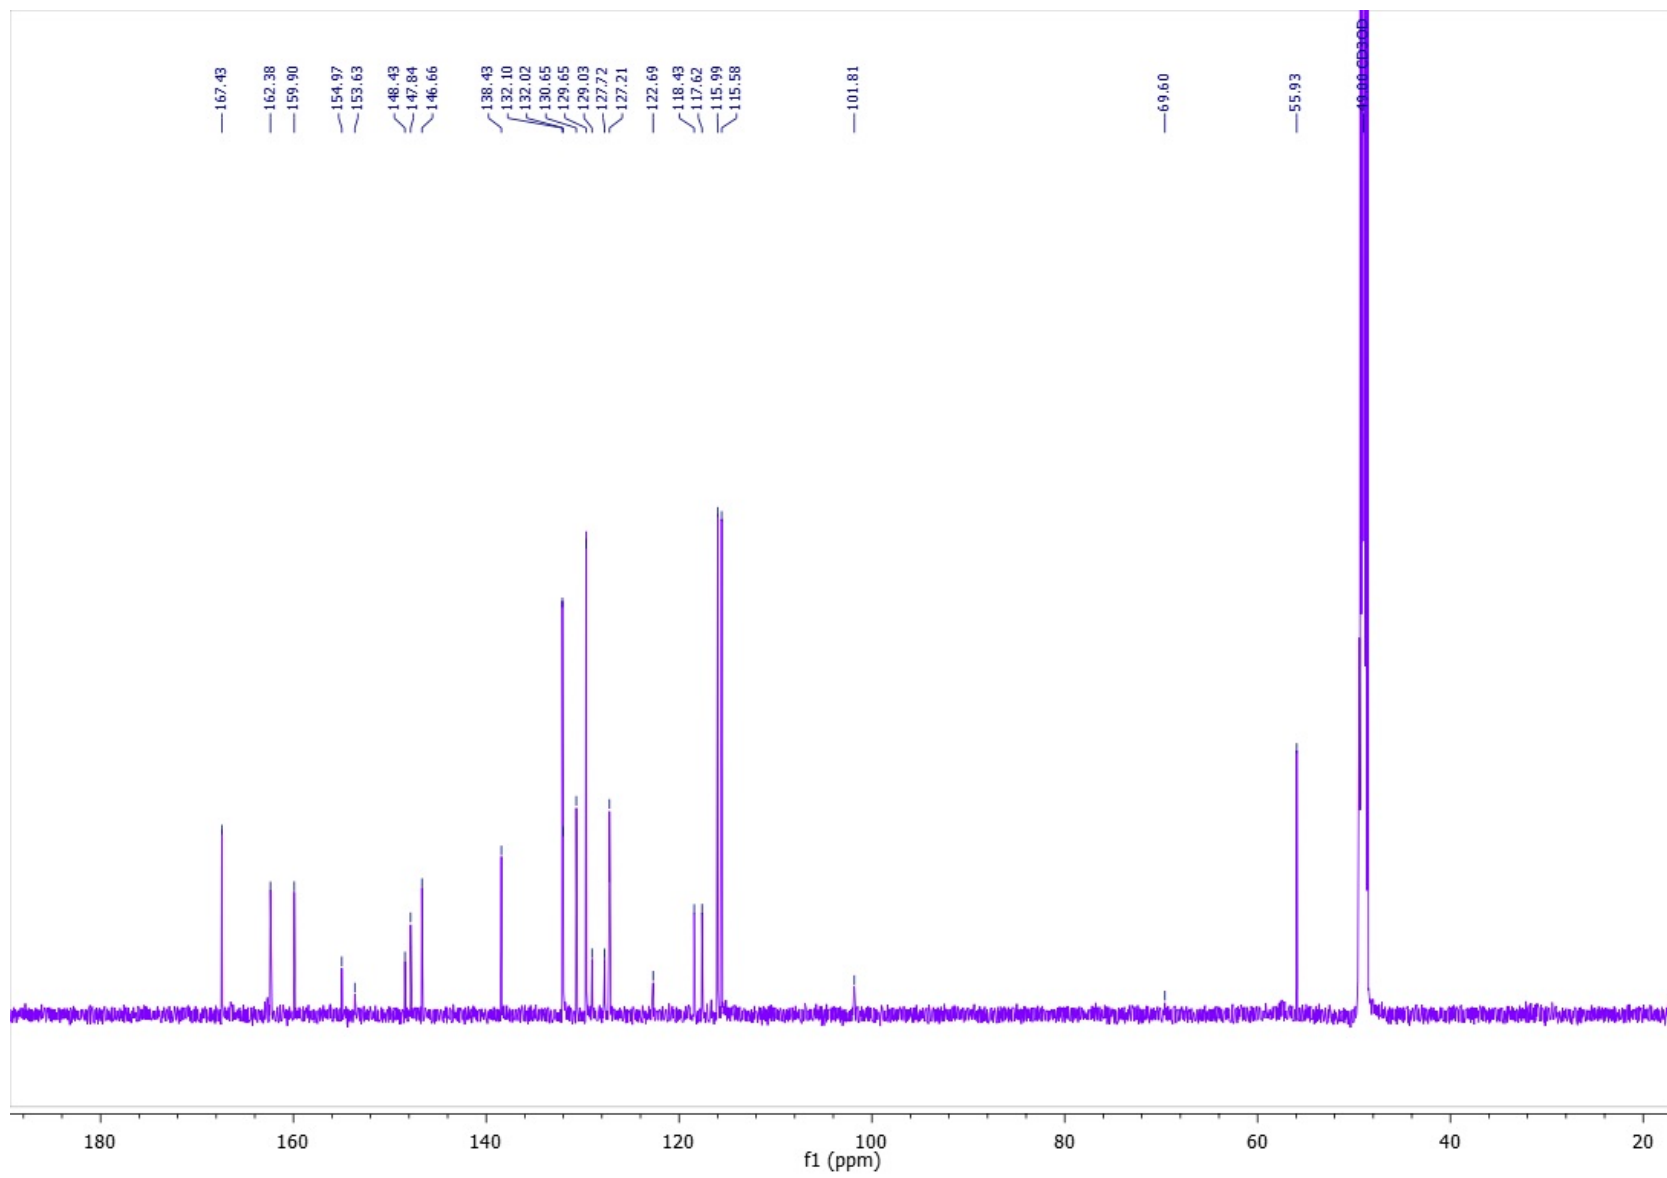

# Synthetic Eudistidine C (1) Free Base and TFA Salt $^1\text{H}$ NMR Spectral Comparison (600 MHz, $\text{CD}_3\text{OD}$ )

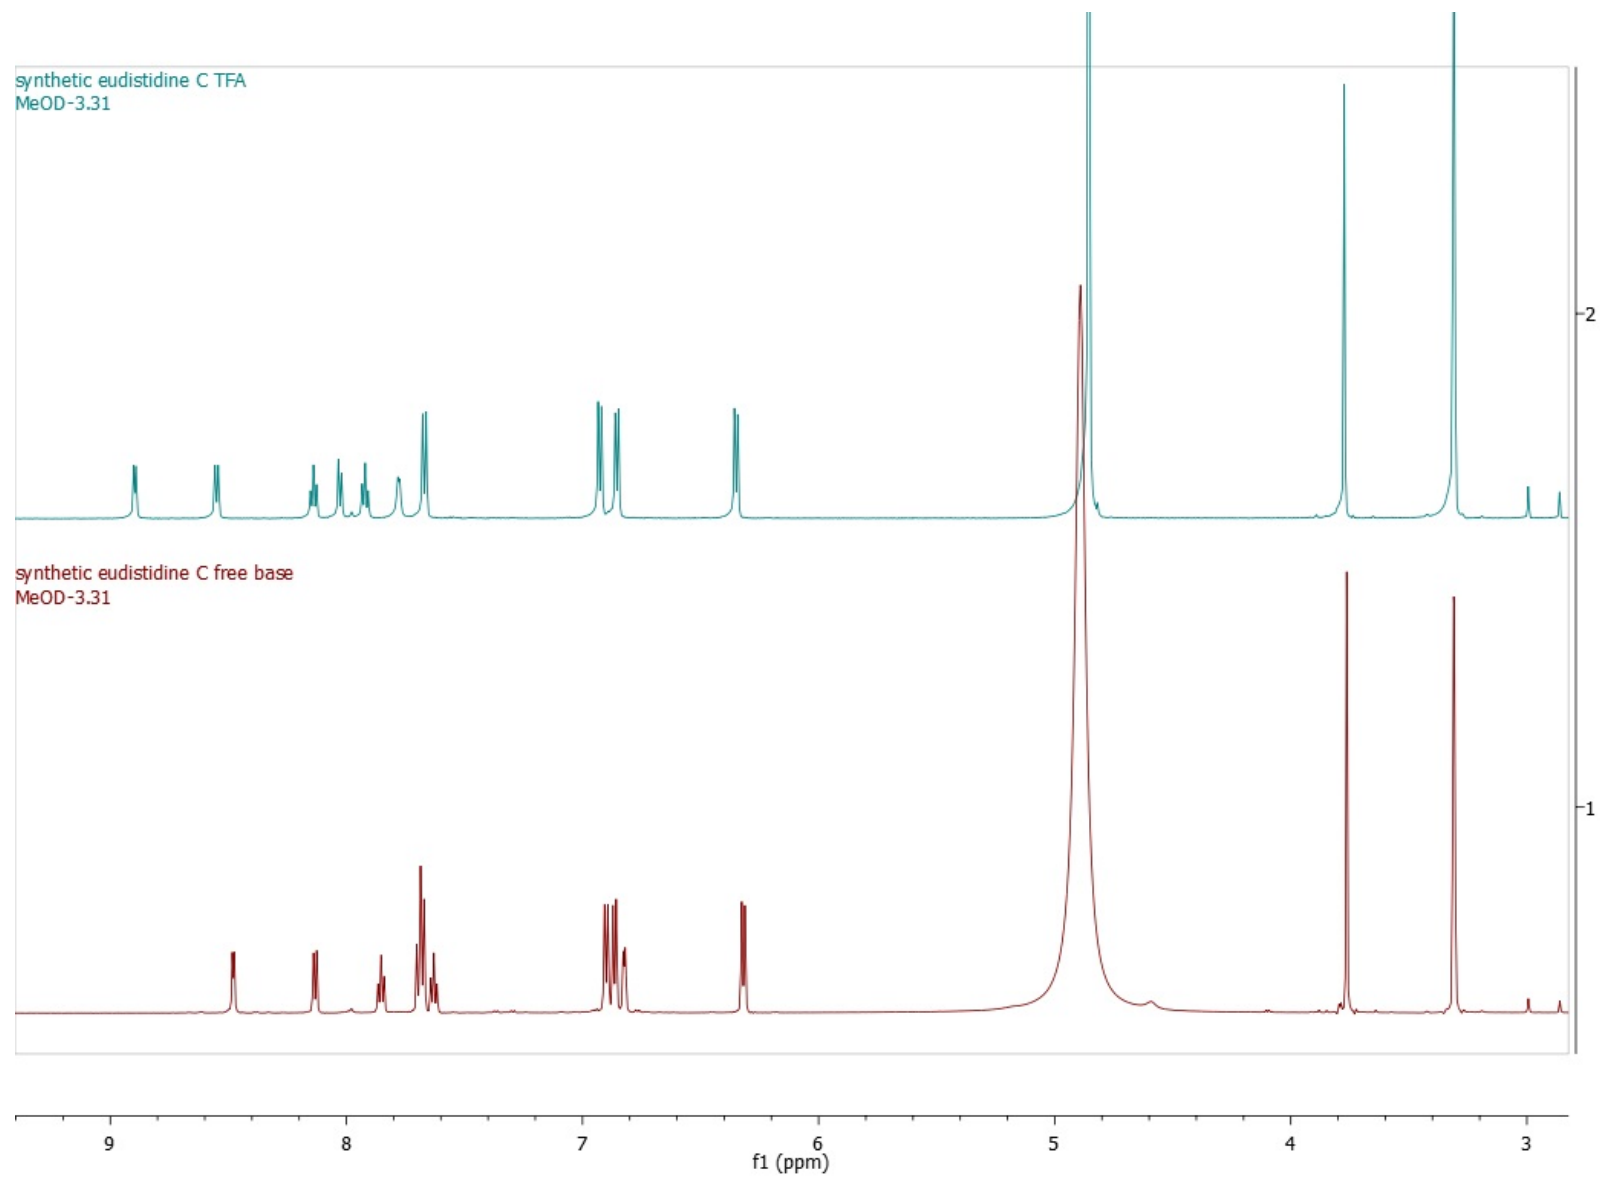

# Eudistidine C (1) Natural Product and Synthetic TFA Salts $^1\text{H}$ NMR Spectral Comparison (600 MHz, $\text{CD}_3\text{OD}$ )

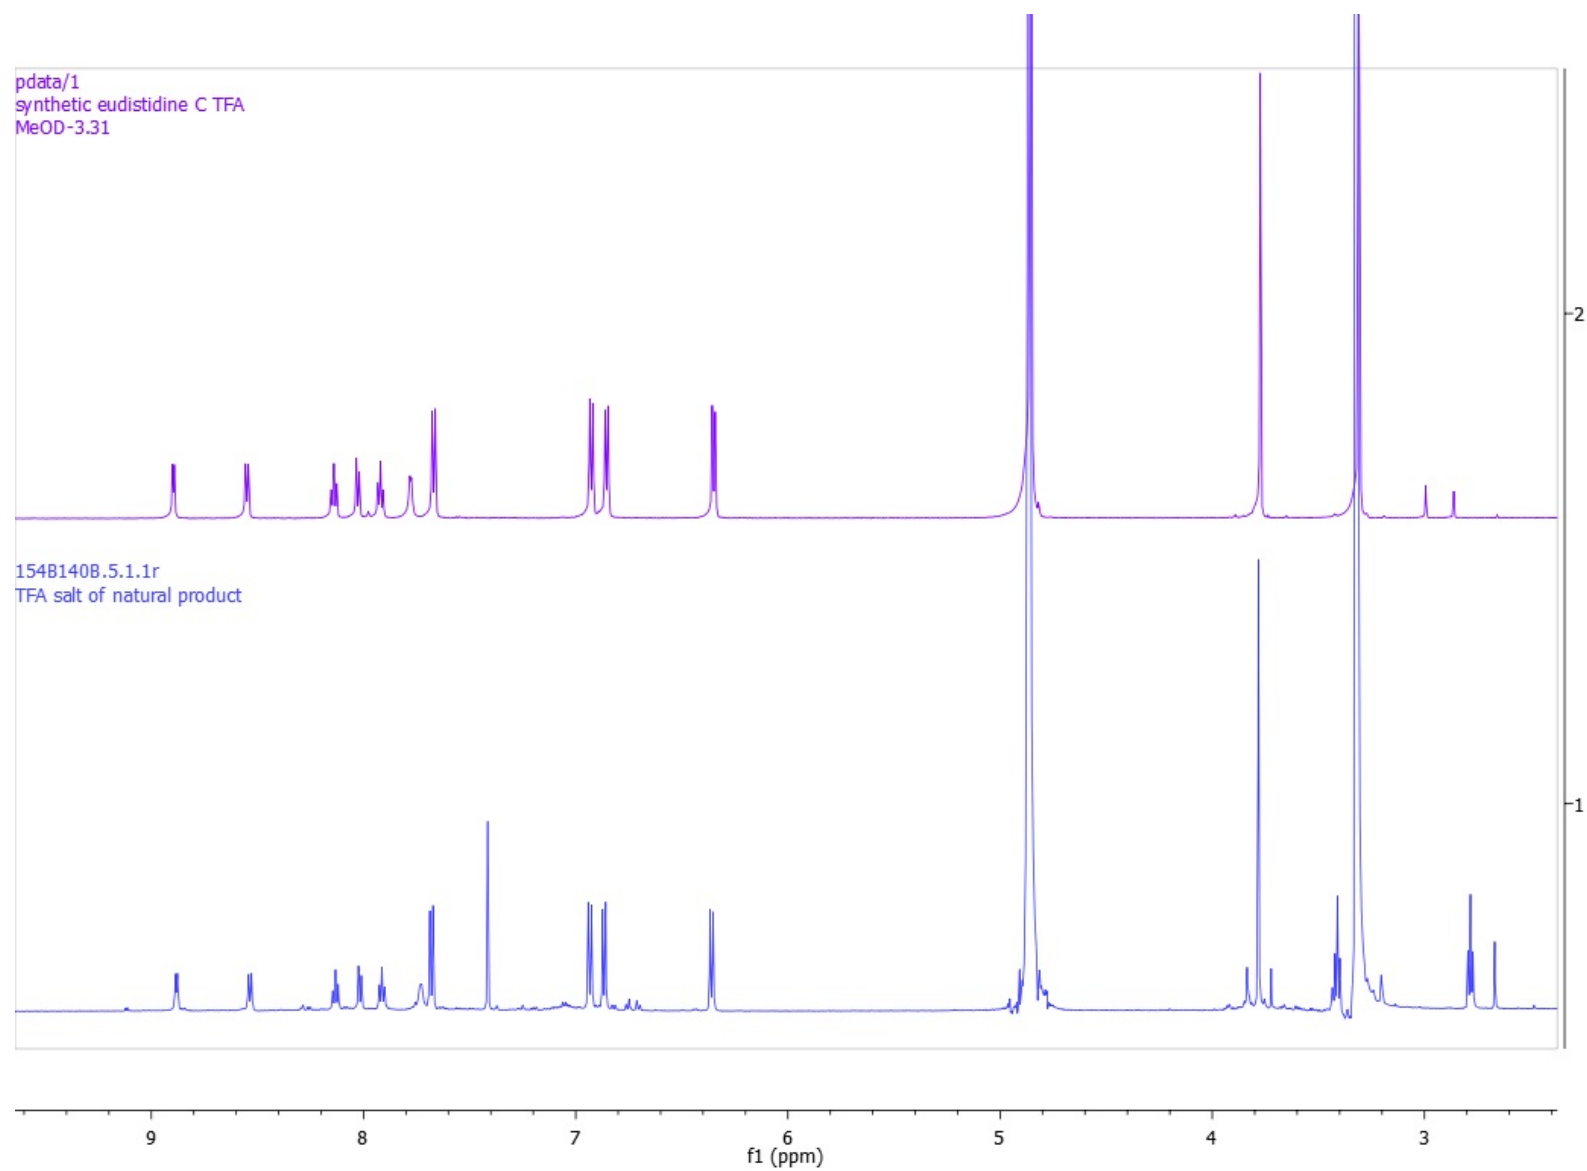



**Eudistidine C (1) Natural Product and Synthetic Free Base & TFA Salt  $^1\text{H}$  NMR Spectral Comparison (600 MHz,  $\text{CD}_3\text{OD}$ )**

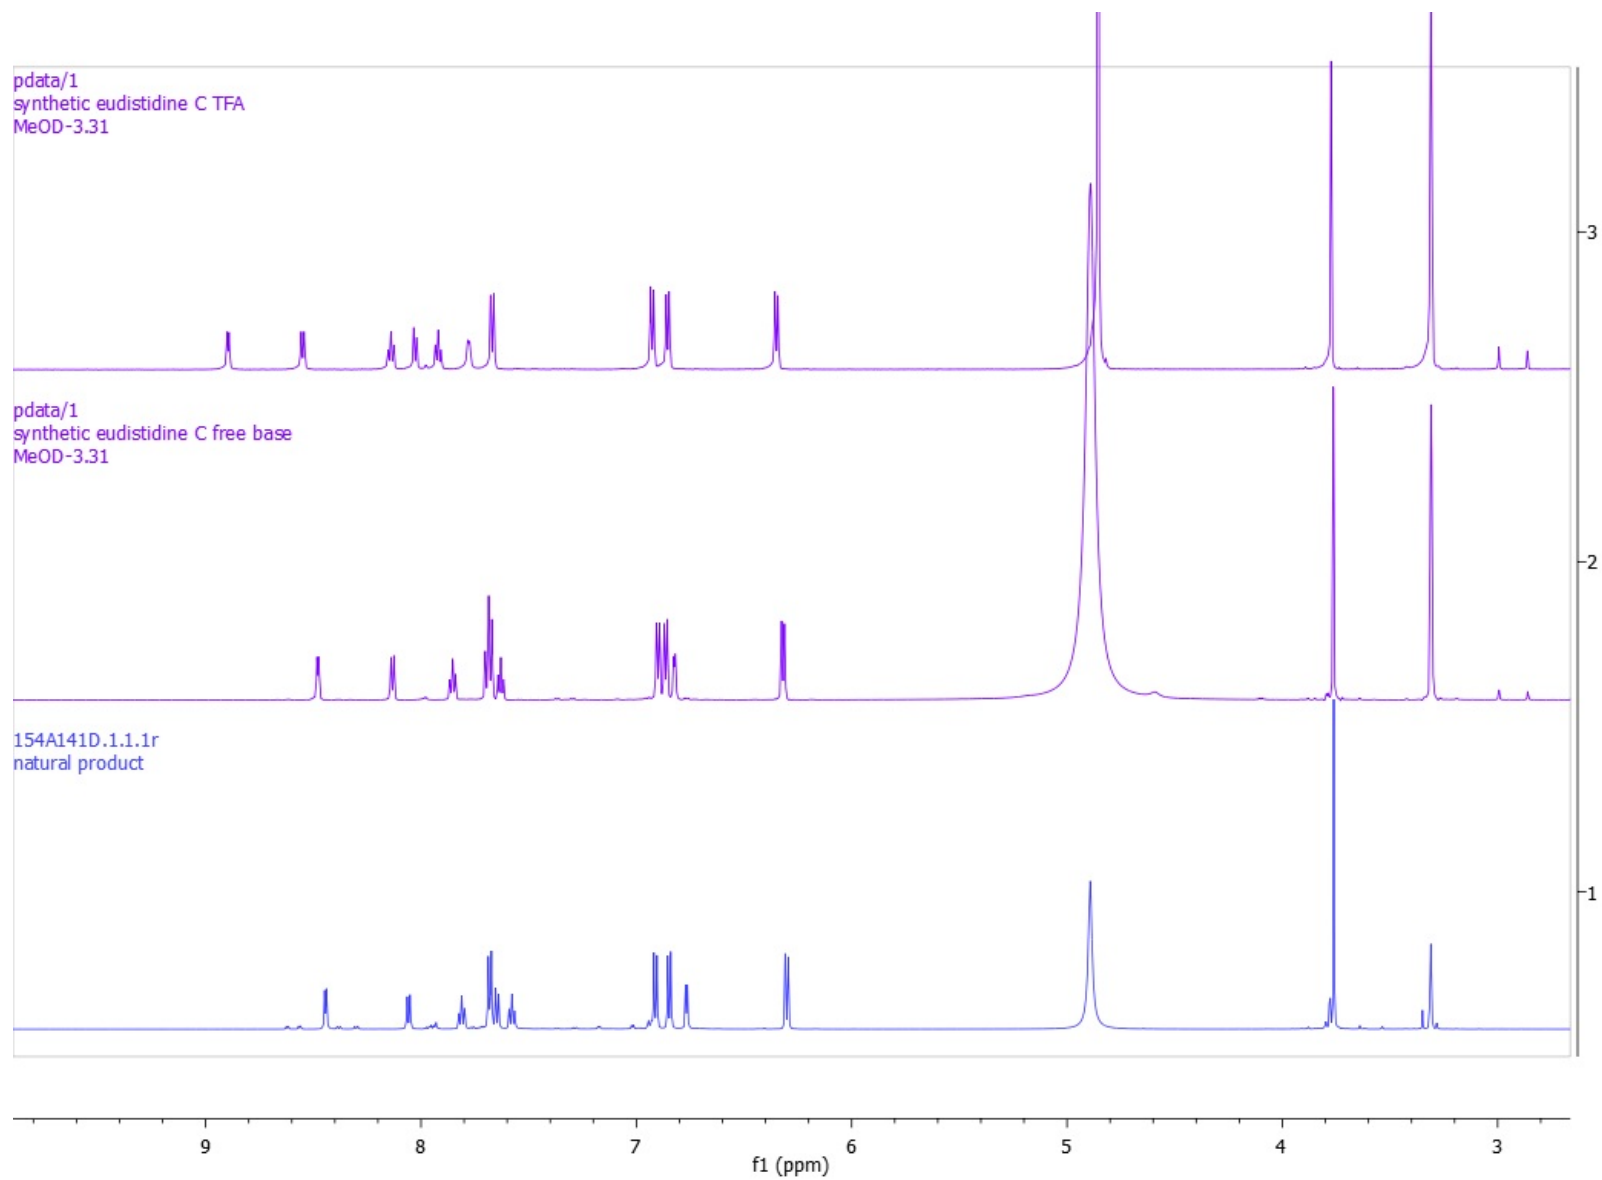

# Eudistidine C (1) Natural Product and Synthetic Free Base and TFA Salt $^{13}\text{C}$ NMR Spectral Comparison (150 MHz, $\text{CD}_3\text{OD}$ )

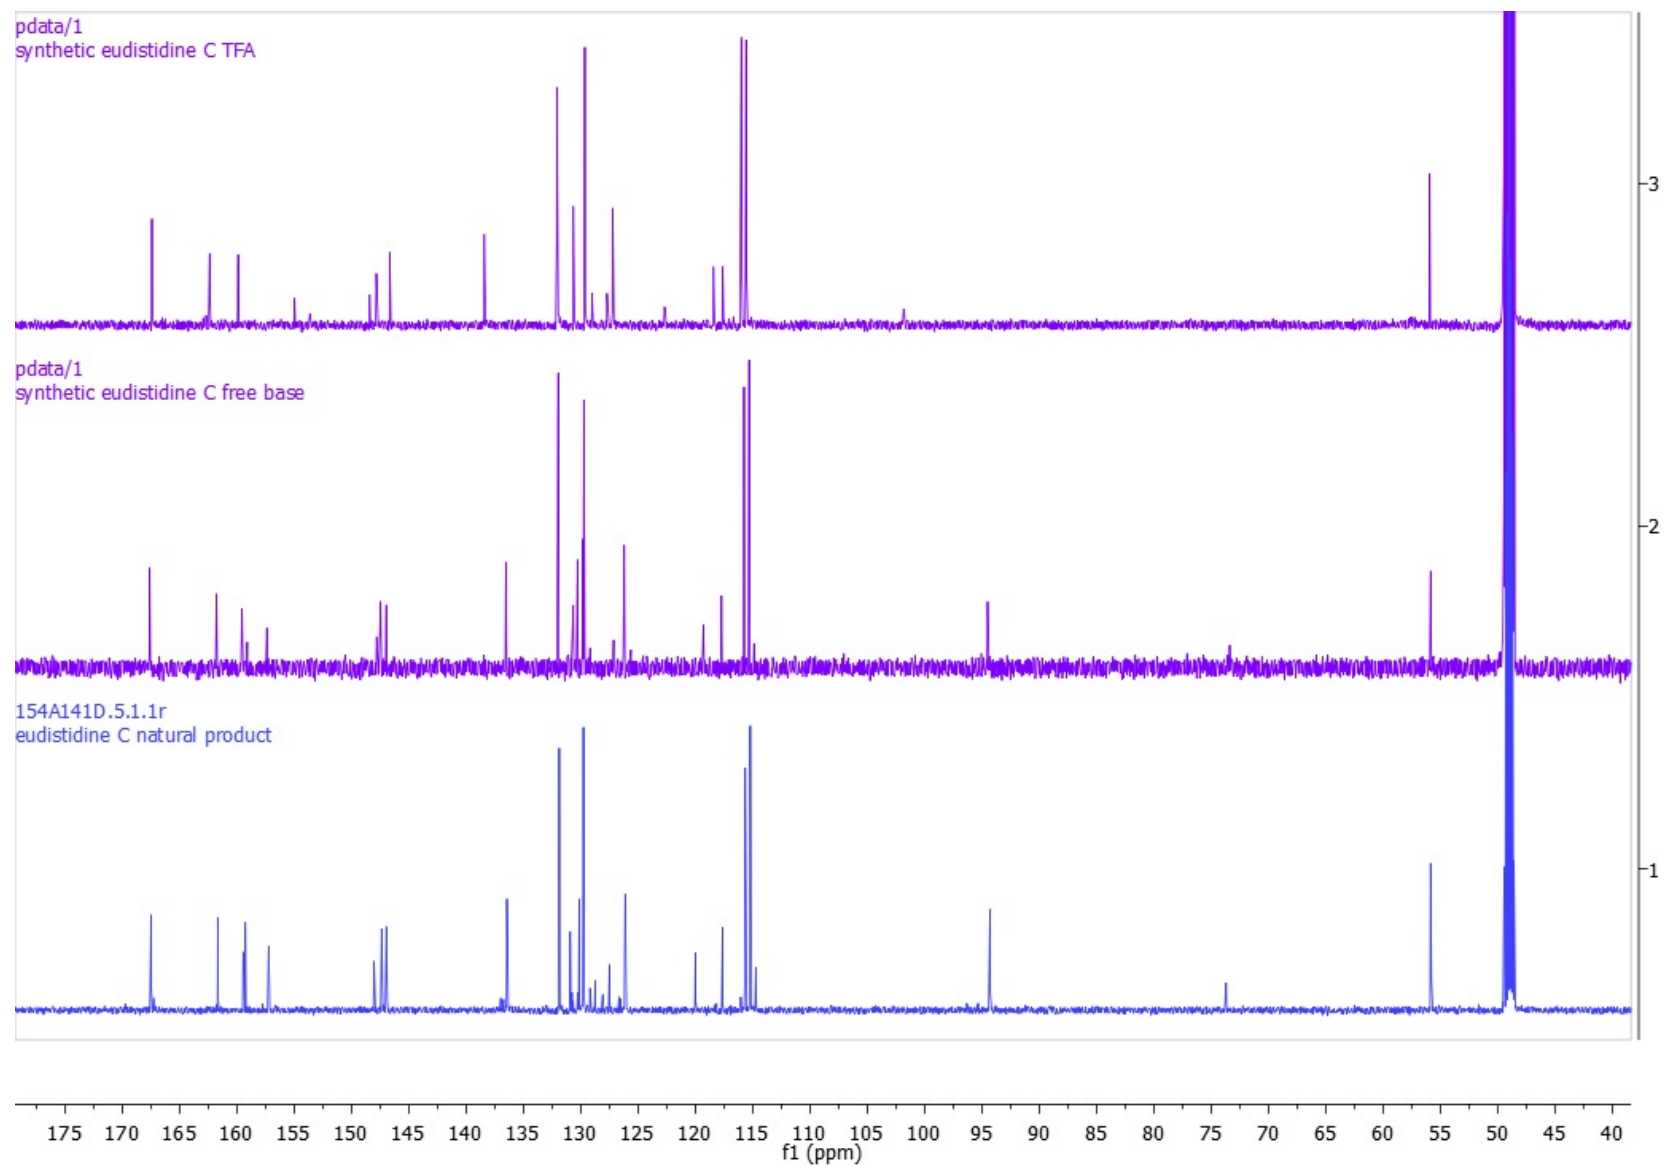

Synthetic Eudistidine C *N*-Methyl Indole Analogue (5)  $^1\text{H}$  NMR Spectrum (600 MHz,  $\text{CD}_3\text{OD}$ )

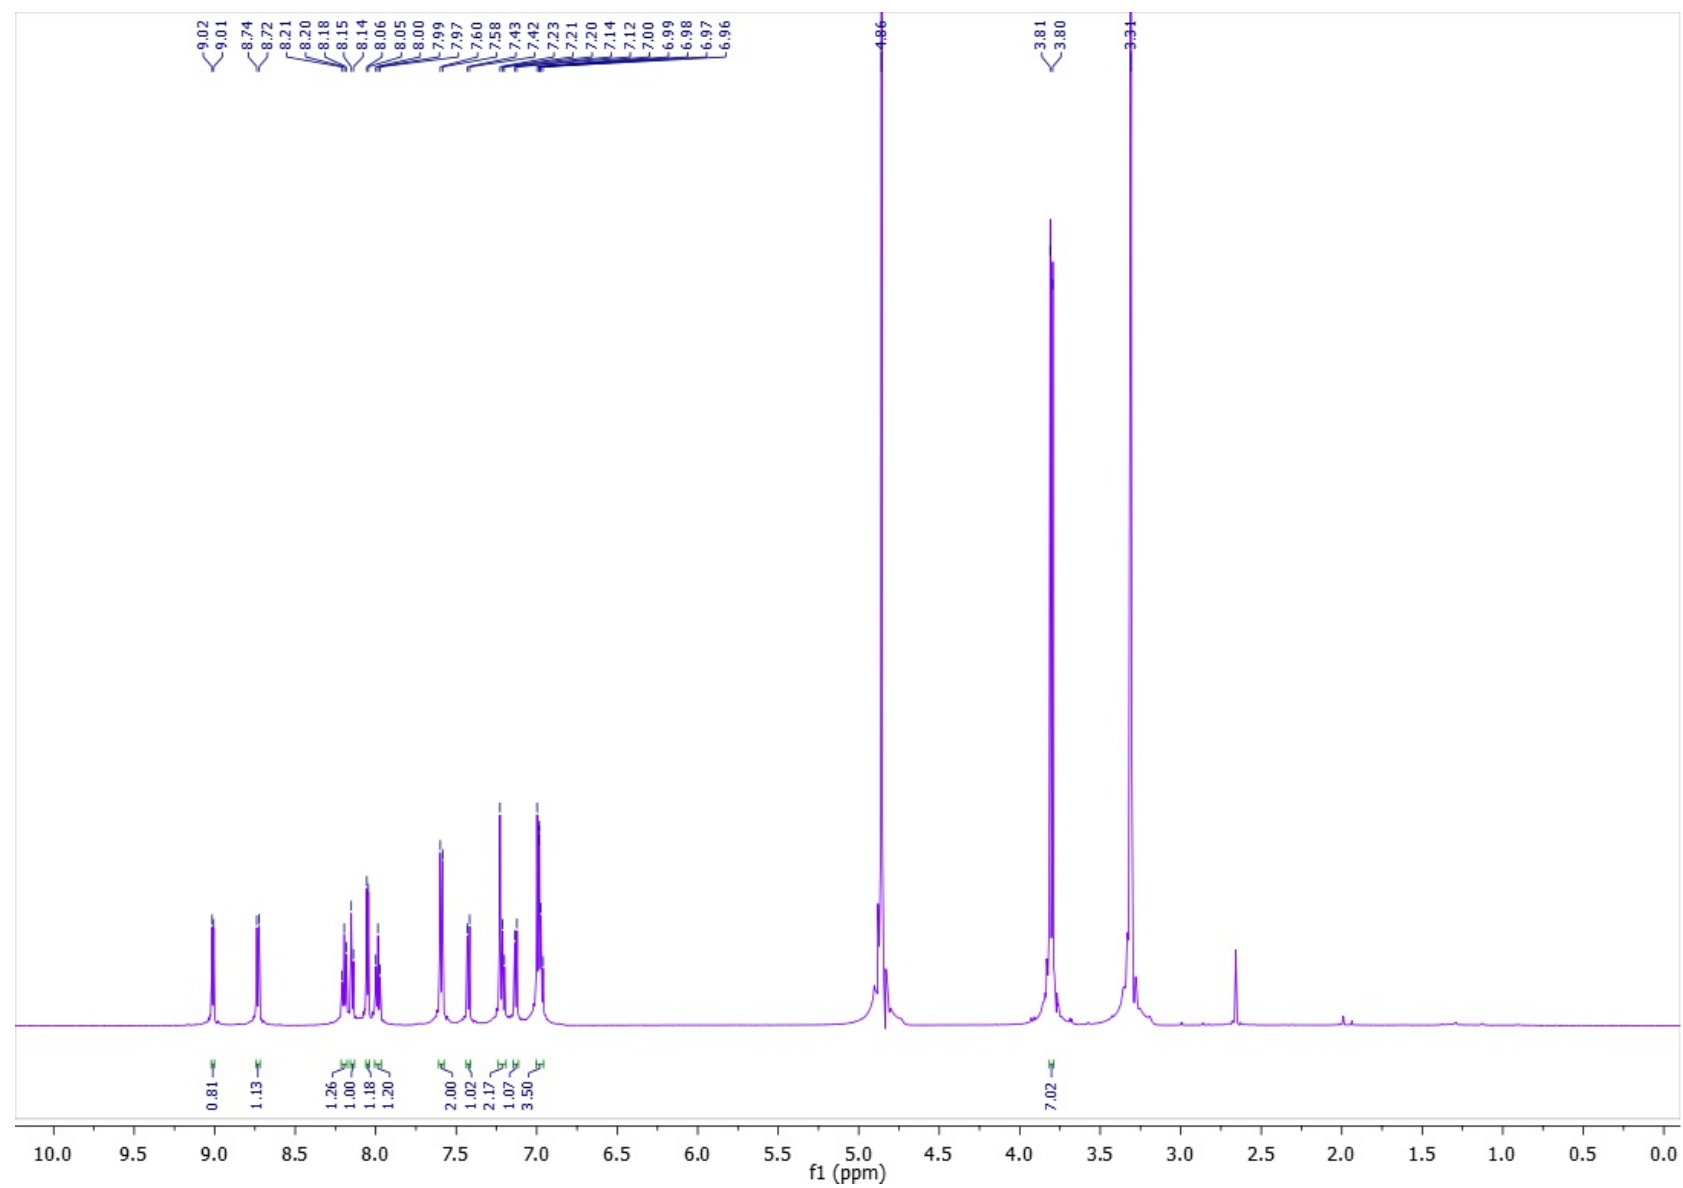

Synthetic Eudistidine C *N*-Methyl Indole Analogue (5)  $^{13}\text{C}$  NMR Spectrum (150 MHz,  $\text{CD}_3\text{OD}$ )

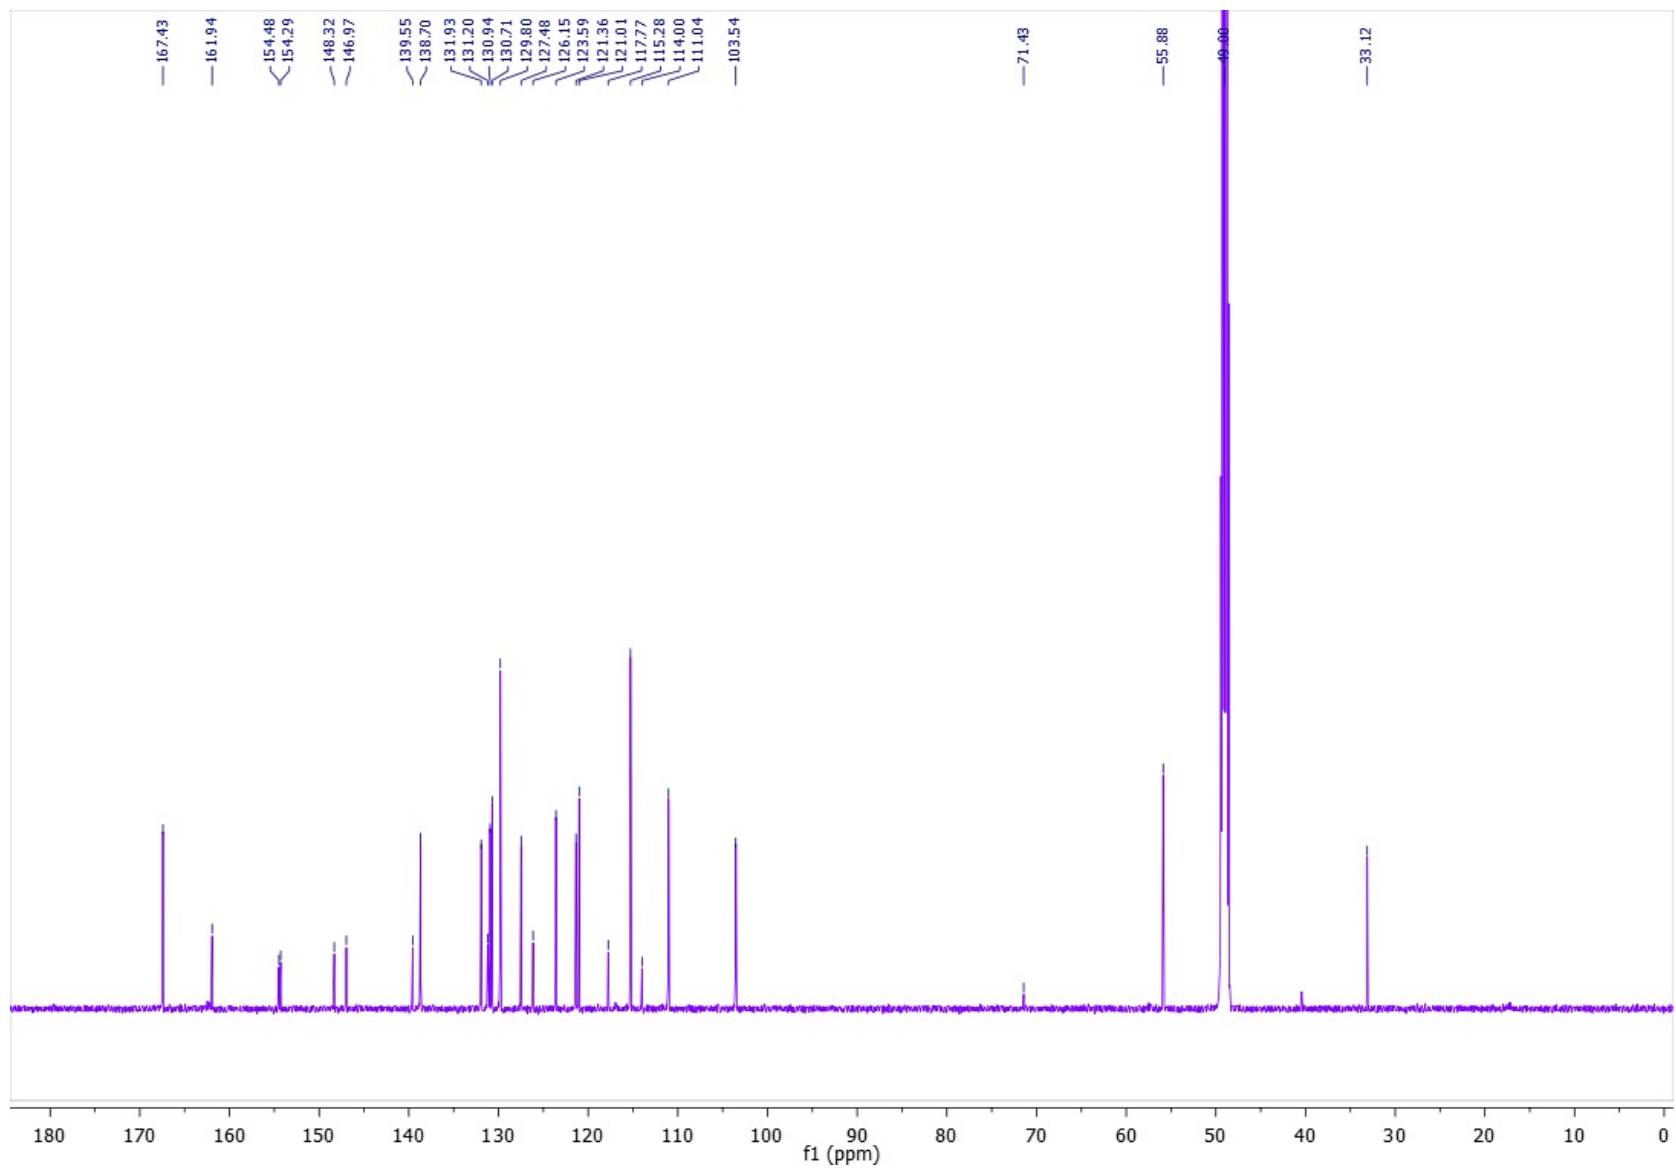

Synthetic Eudistidine C Skatole Analogue (6) <sup>1</sup>H NMR Spectrum (600 MHz, CD<sub>3</sub>OD)

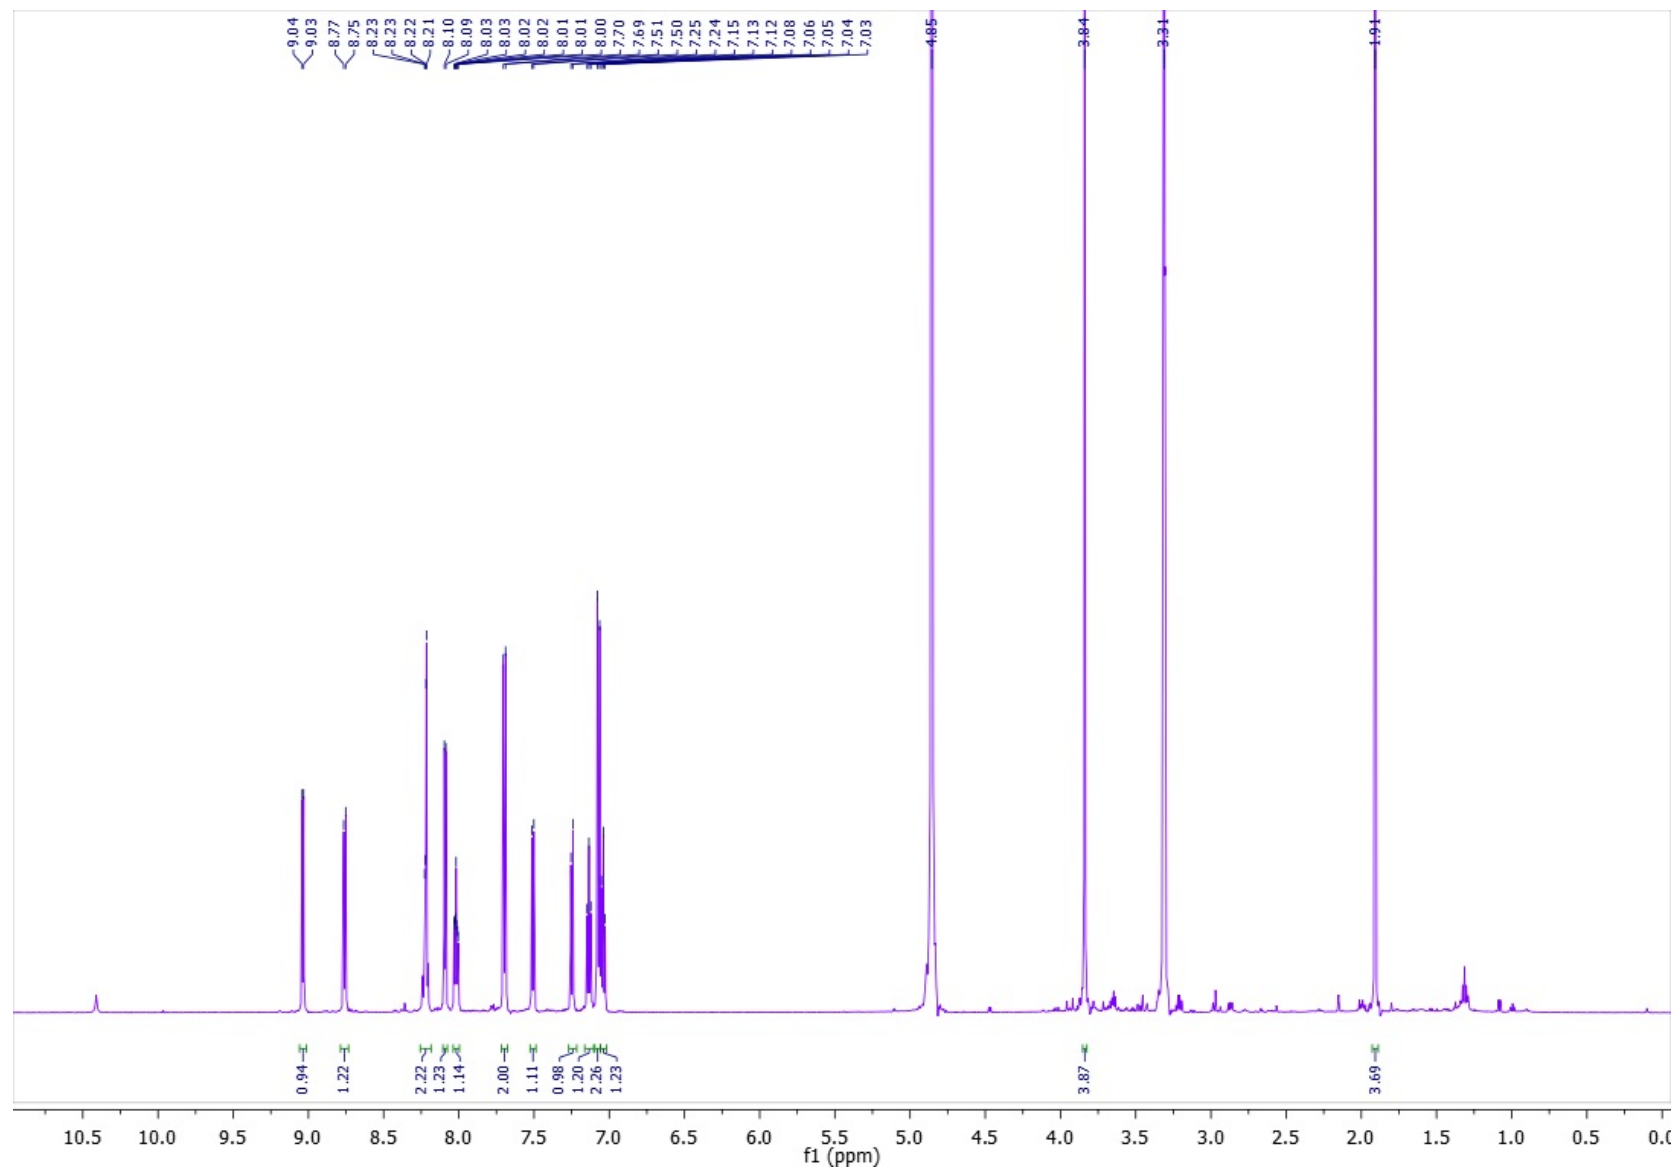

Synthetic Eudistidine C Skatole Analogue (6)  $^{13}\text{C}$  NMR Spectrum (150 MHz,  $\text{CD}_3\text{OD}$ )

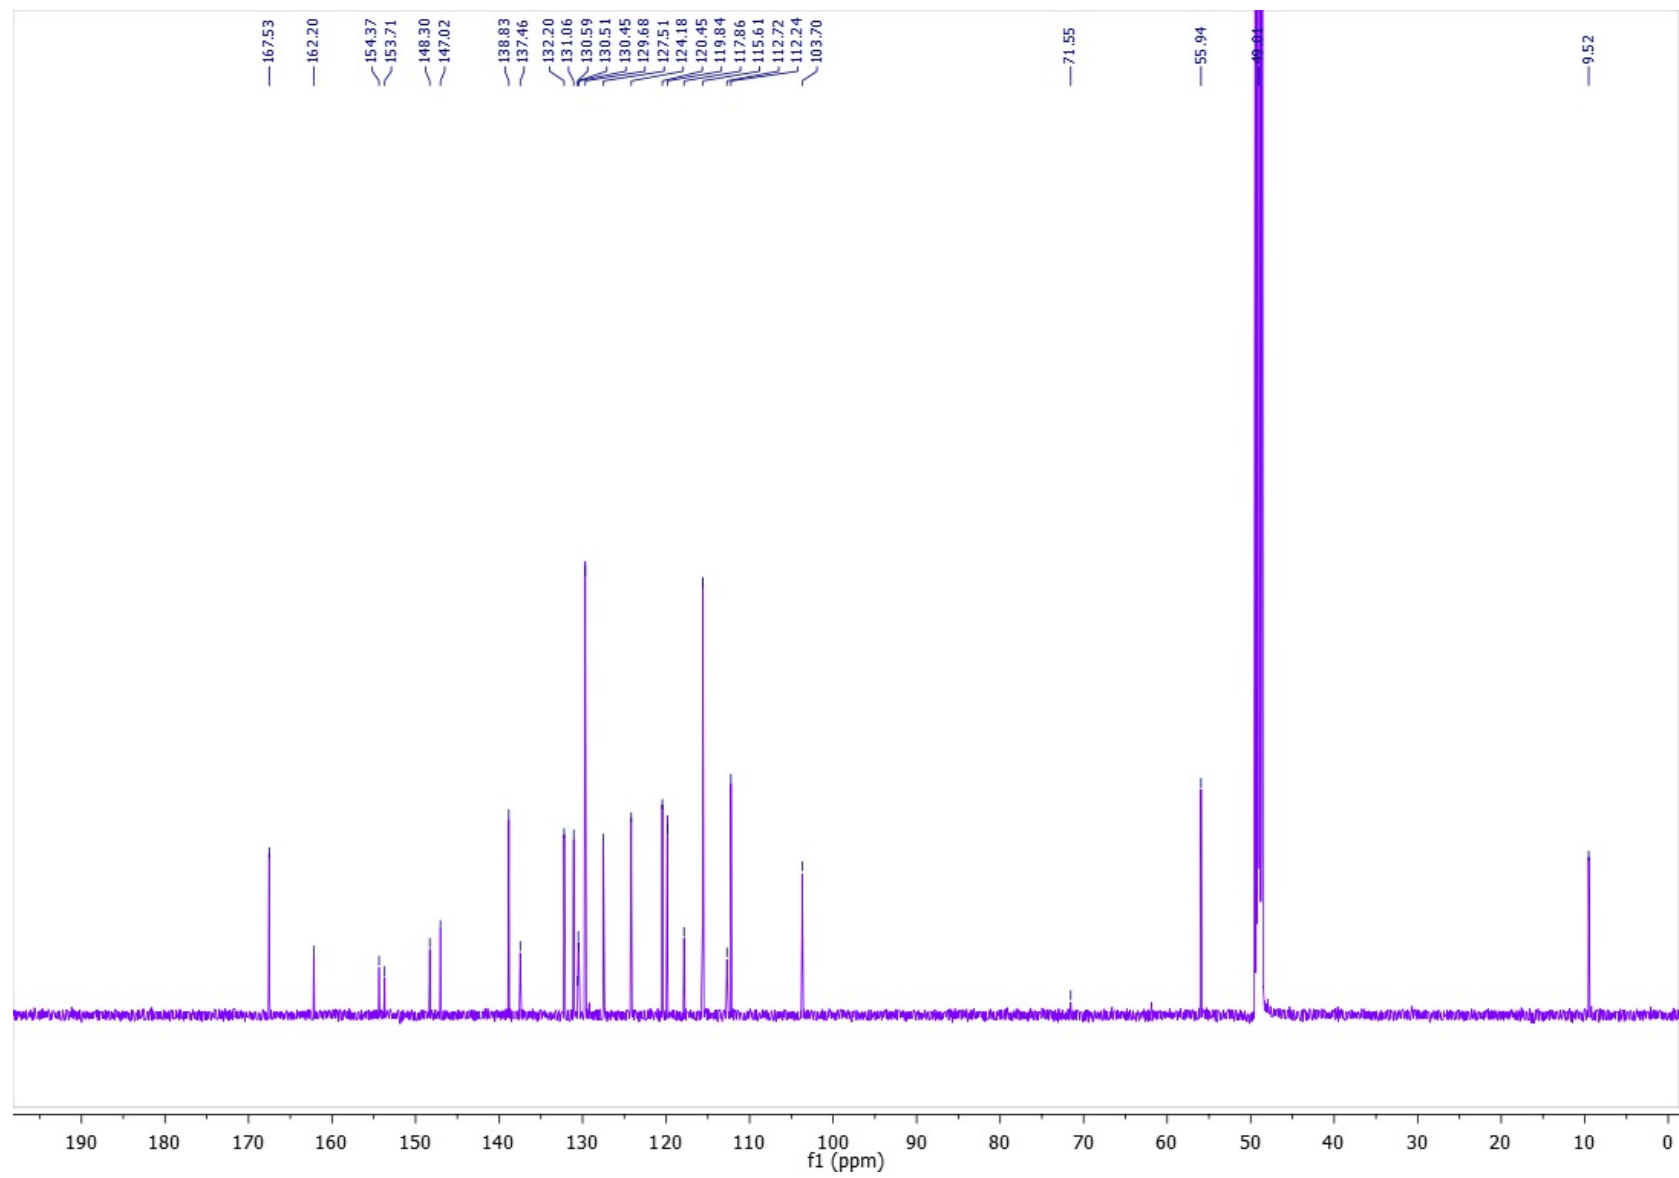

Synthetic Eudistidine C *N*-Methyl Pyrrole Analogue (7) <sup>1</sup>H NMR Spectrum (600 MHz, CD<sub>3</sub>OD)

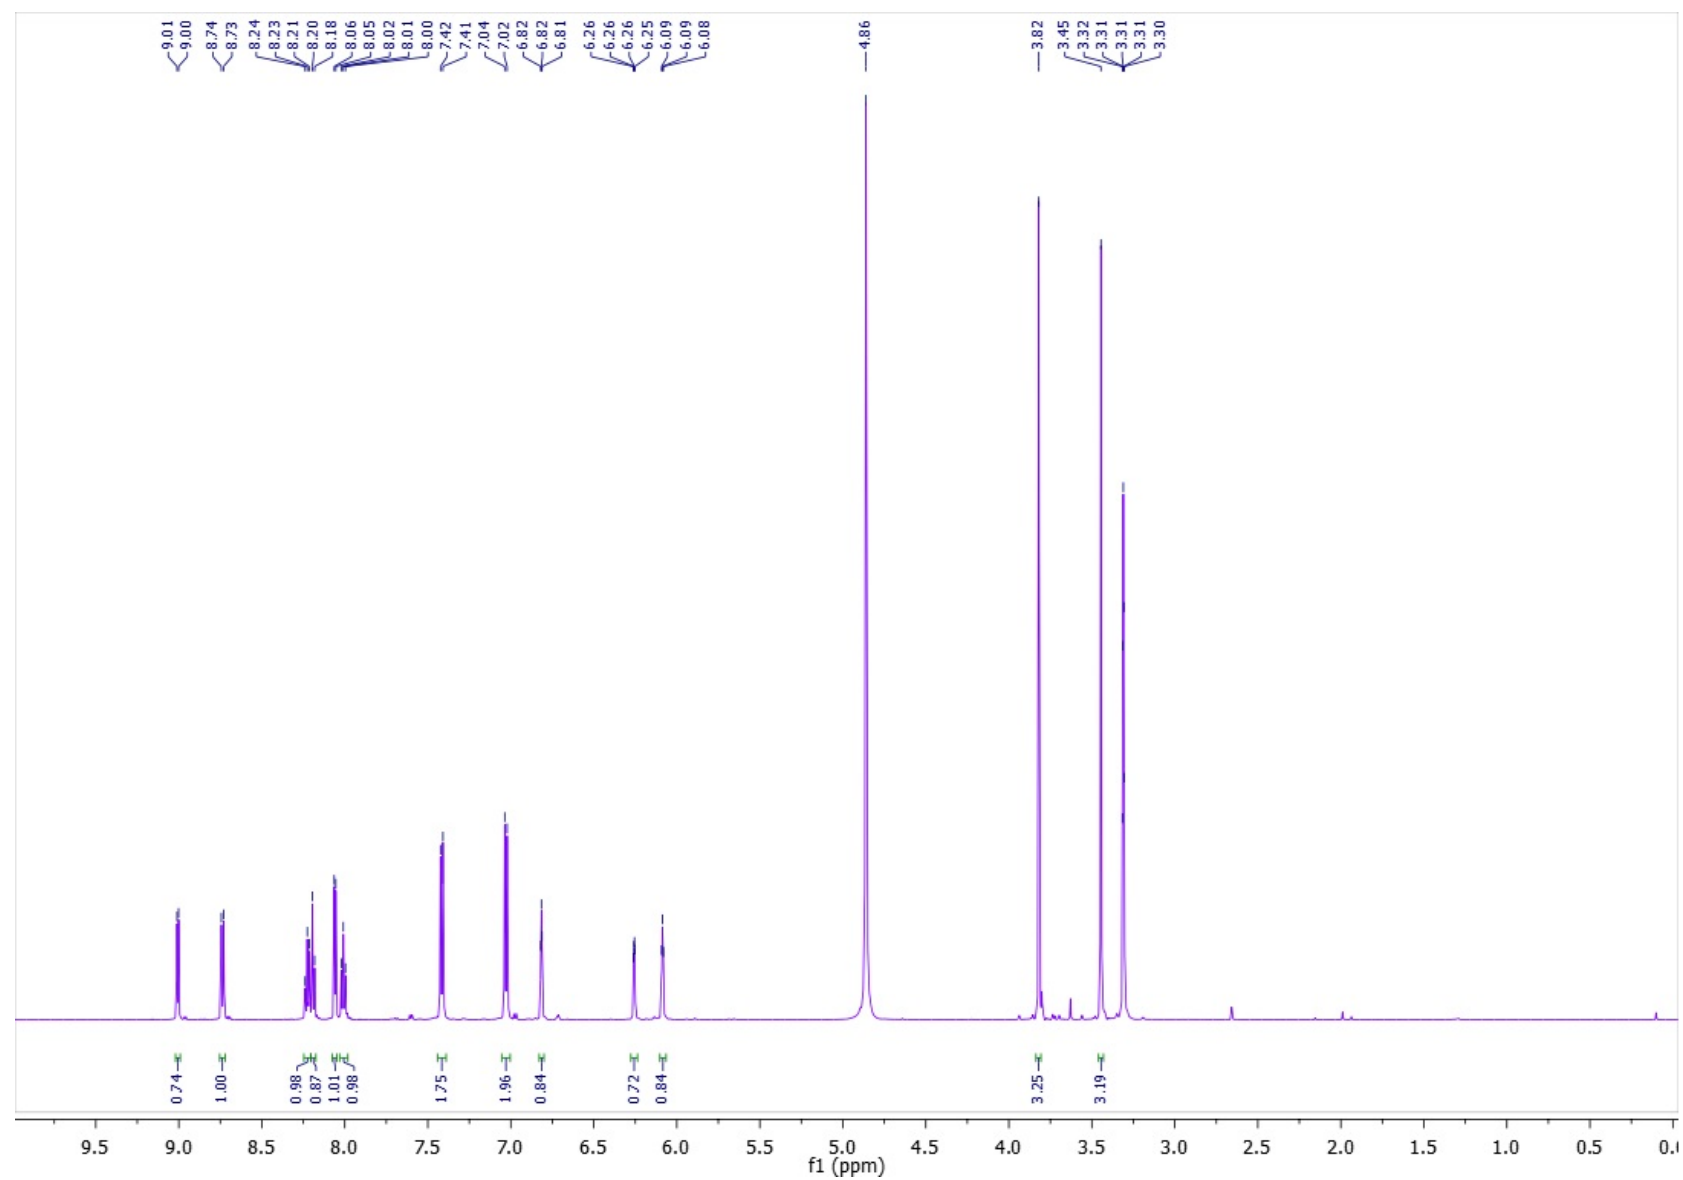

Synthetic Eudistidine C *N*-Methyl Pyrrole Analogue (7) <sup>13</sup>C NMR Spectrum (150 MHz, CD<sub>3</sub>OD)

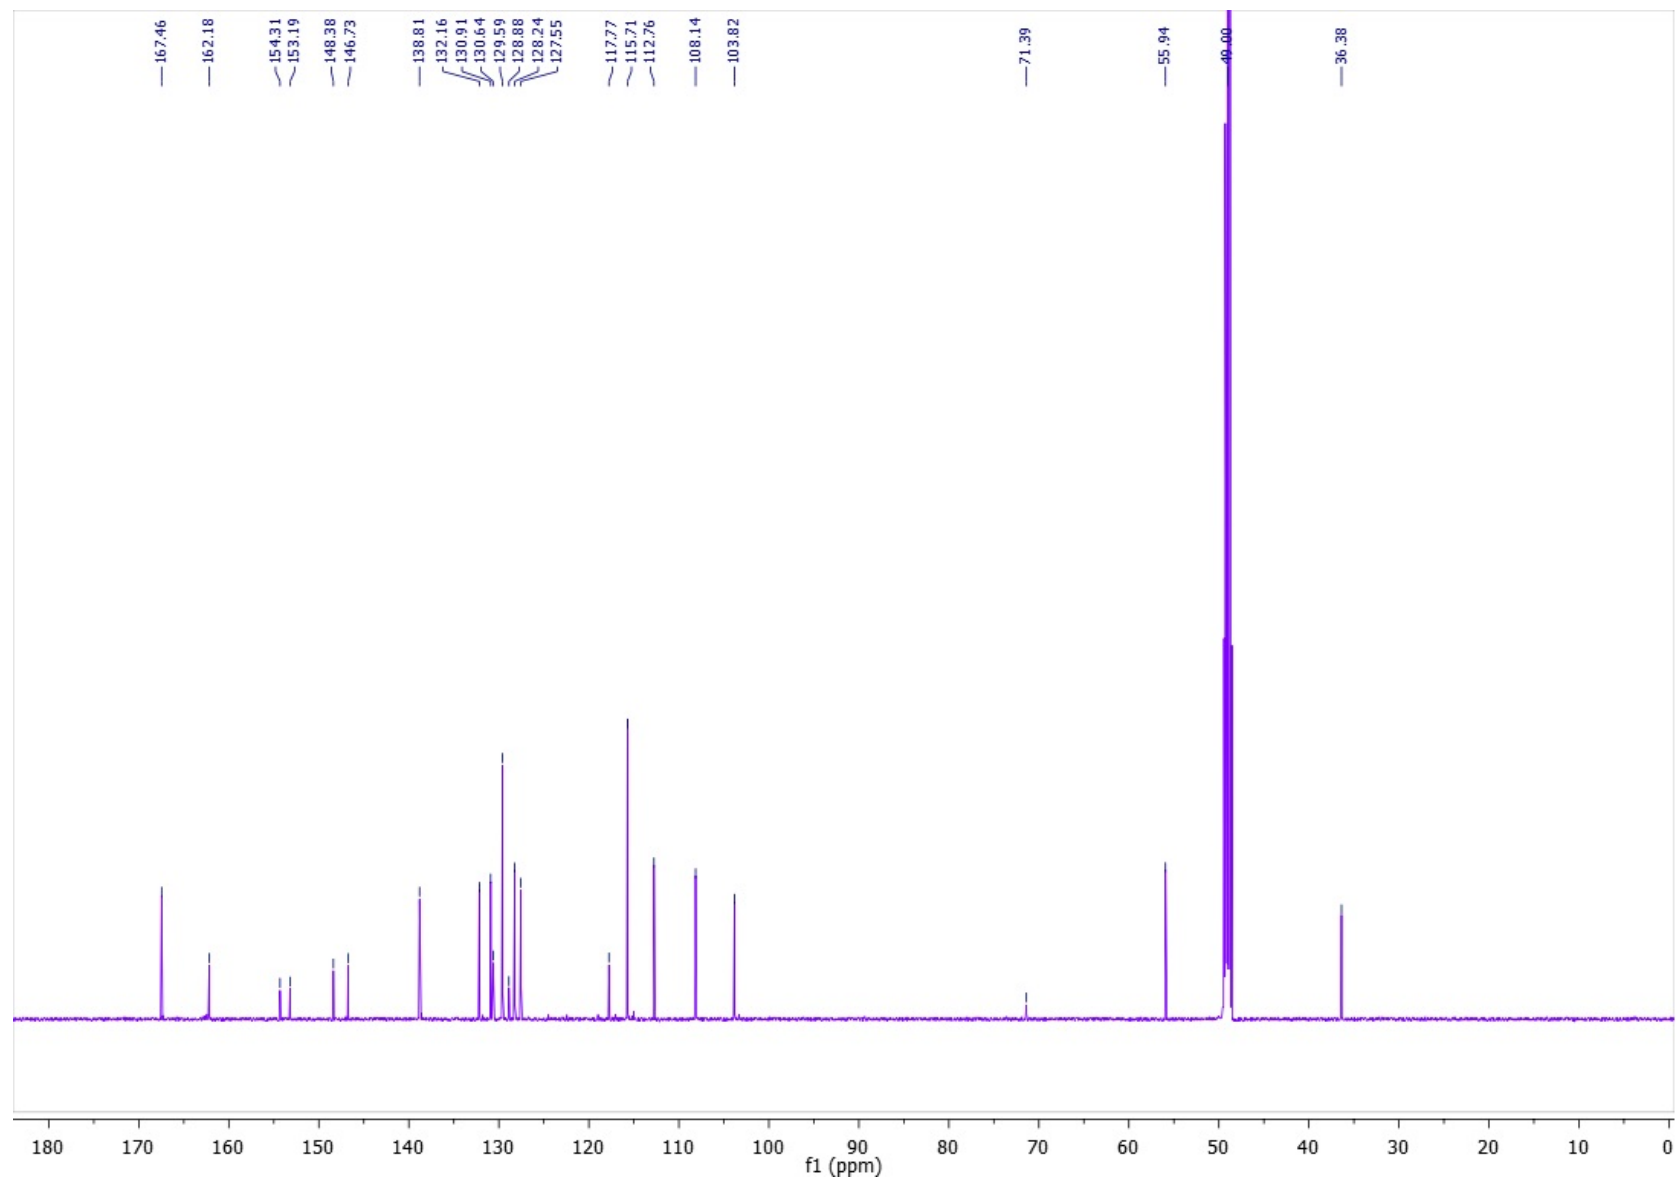



Synthetic Eudistidine C *p*-Phenol Analogue (8) <sup>1</sup>H NMR Spectrum (600 MHz, CD<sub>3</sub>OD)

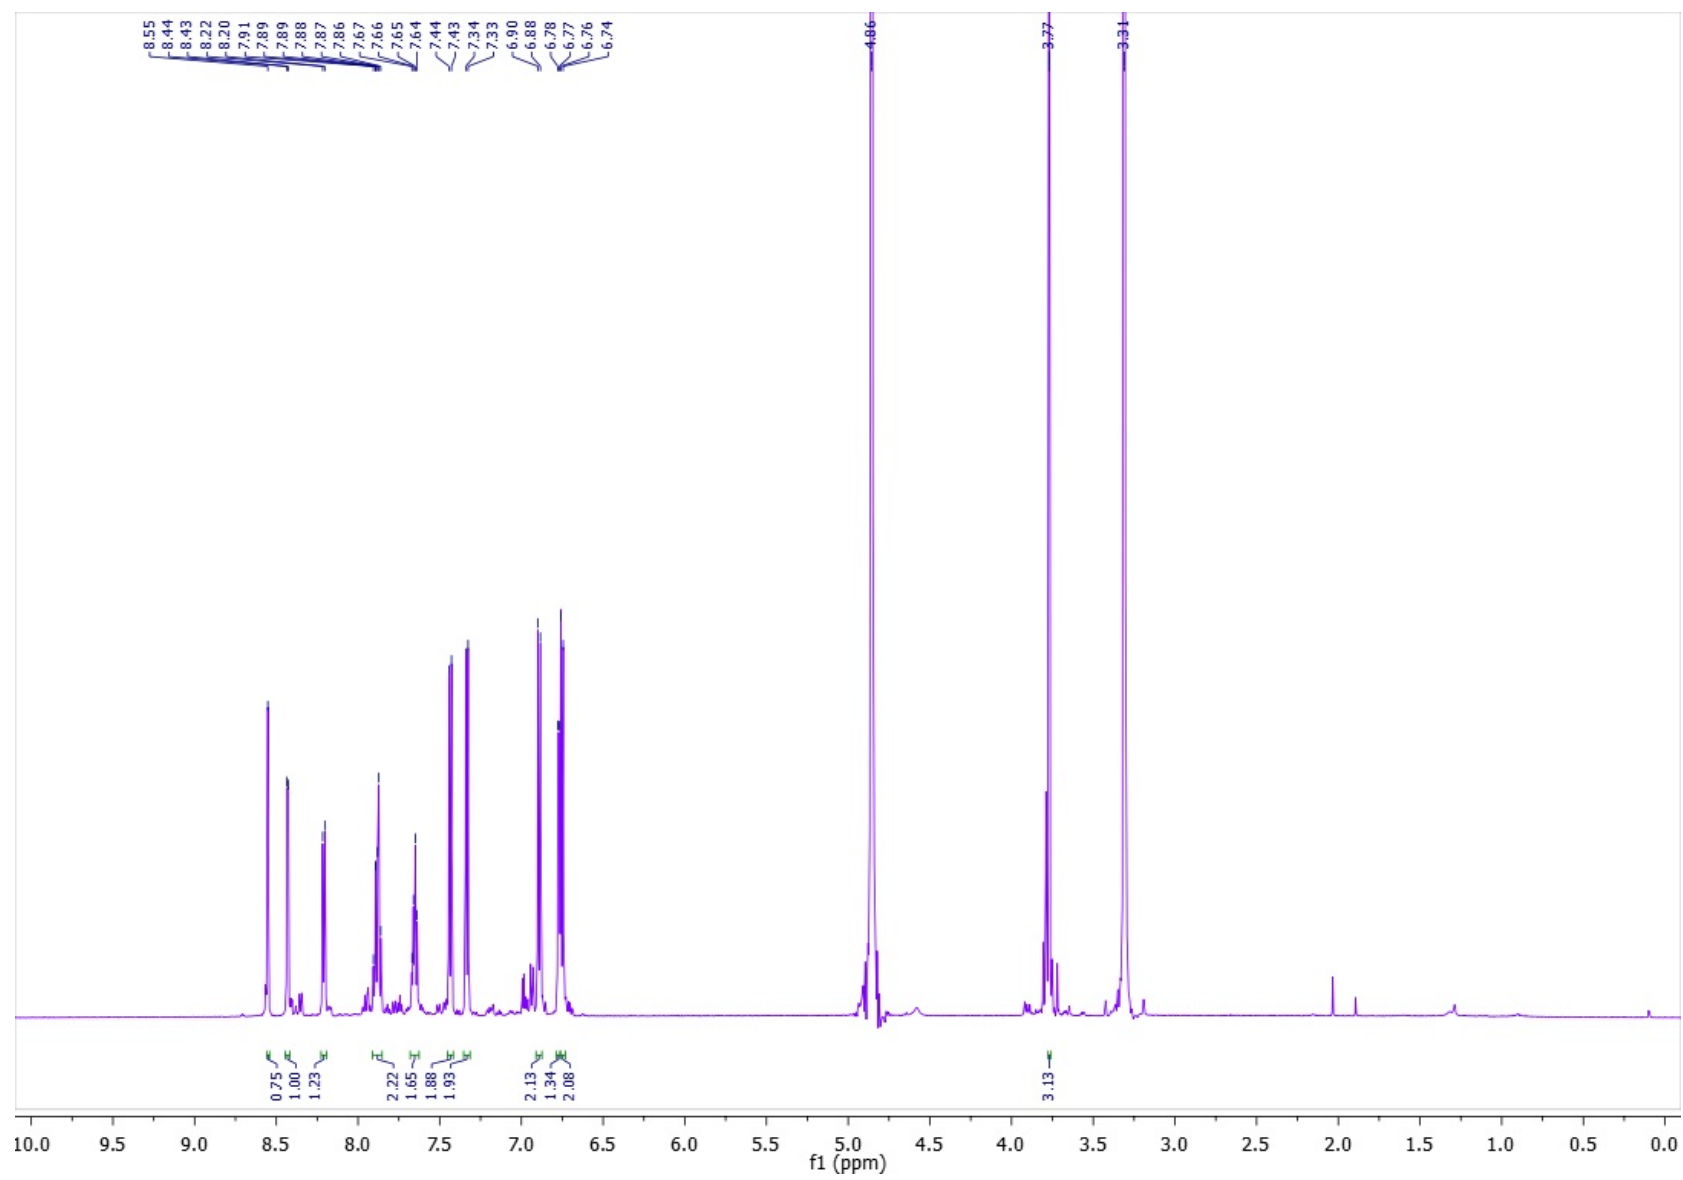

Synthetic Eudistidine C *p*-Phenol Analogue (8) <sup>13</sup>C NMR Spectrum (150 MHz, CD<sub>3</sub>OD)

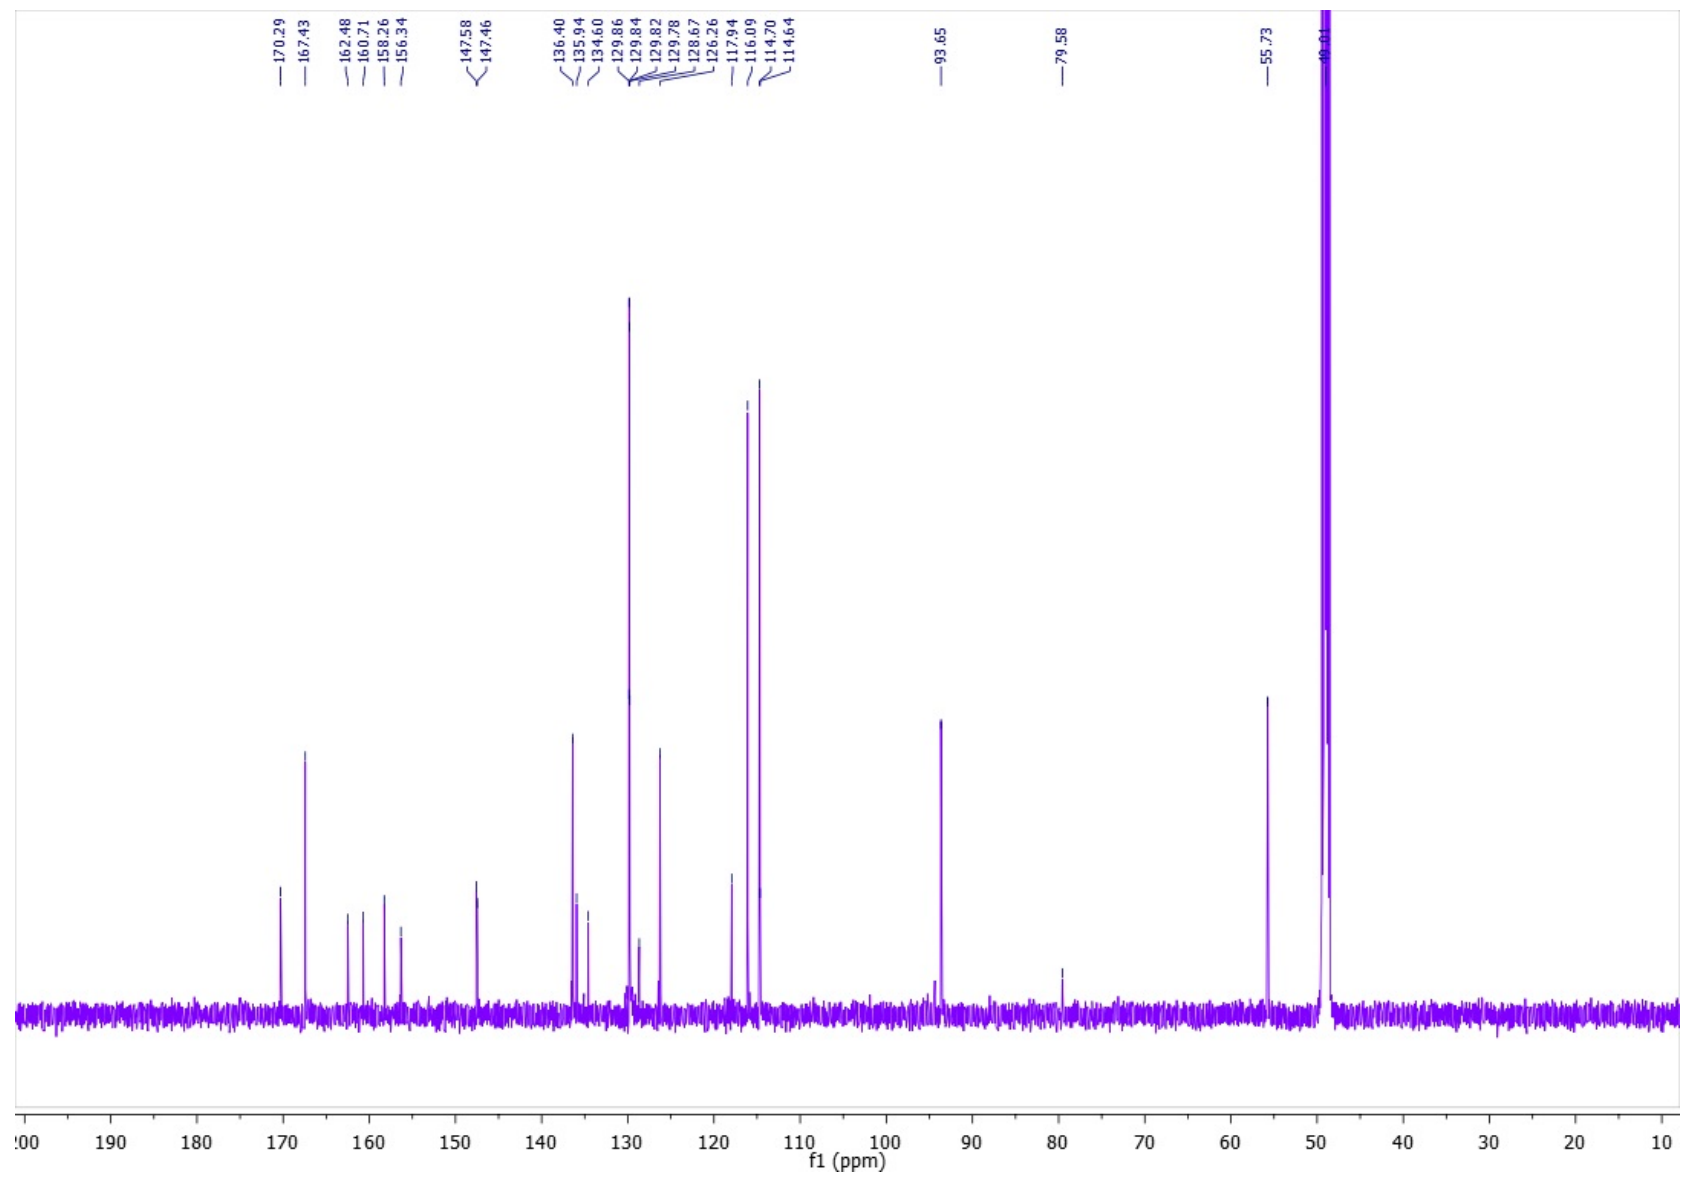

Synthetic Eudistidine C Resorcinol Analogue (9) <sup>1</sup>H NMR Spectrum (600 MHz, DMSO)

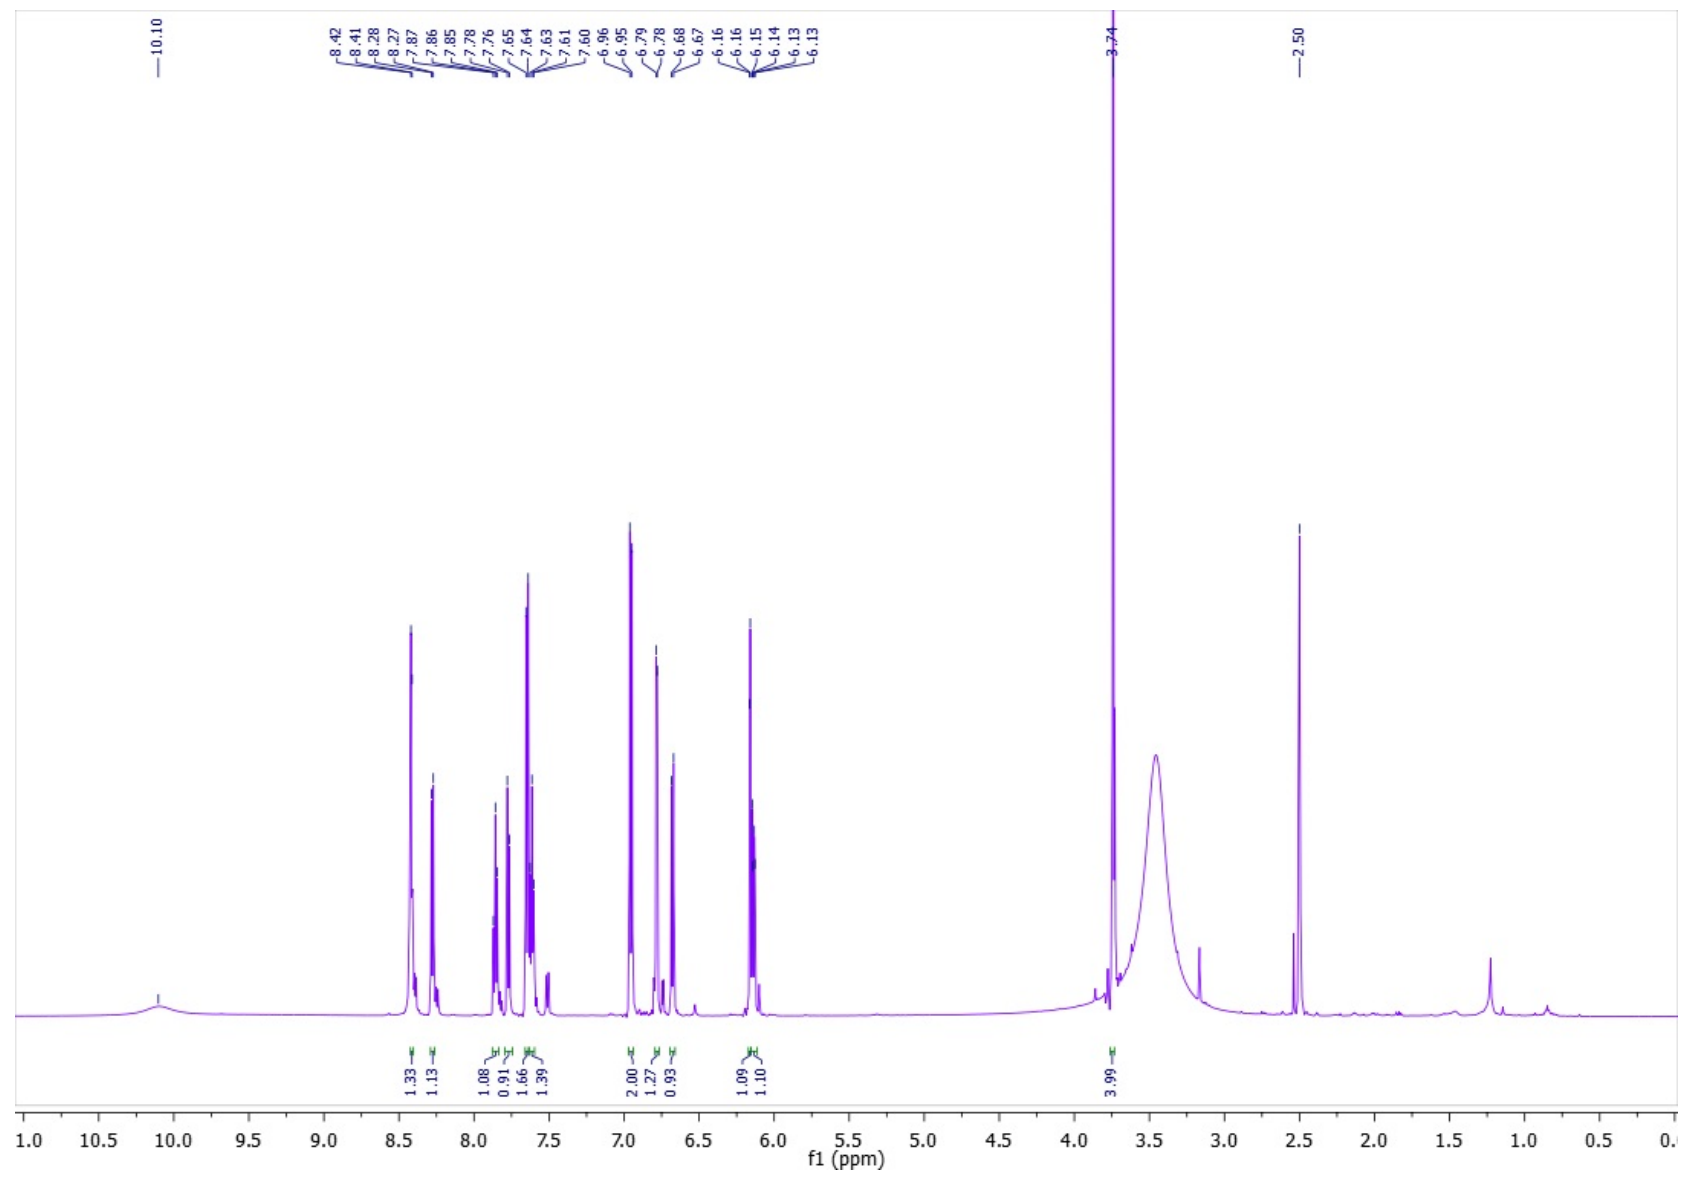

Synthetic Eudistidine C Resorcinol Analogue (9)  $^{13}\text{C}$  NMR Spectrum (150 MHz, DMSO)

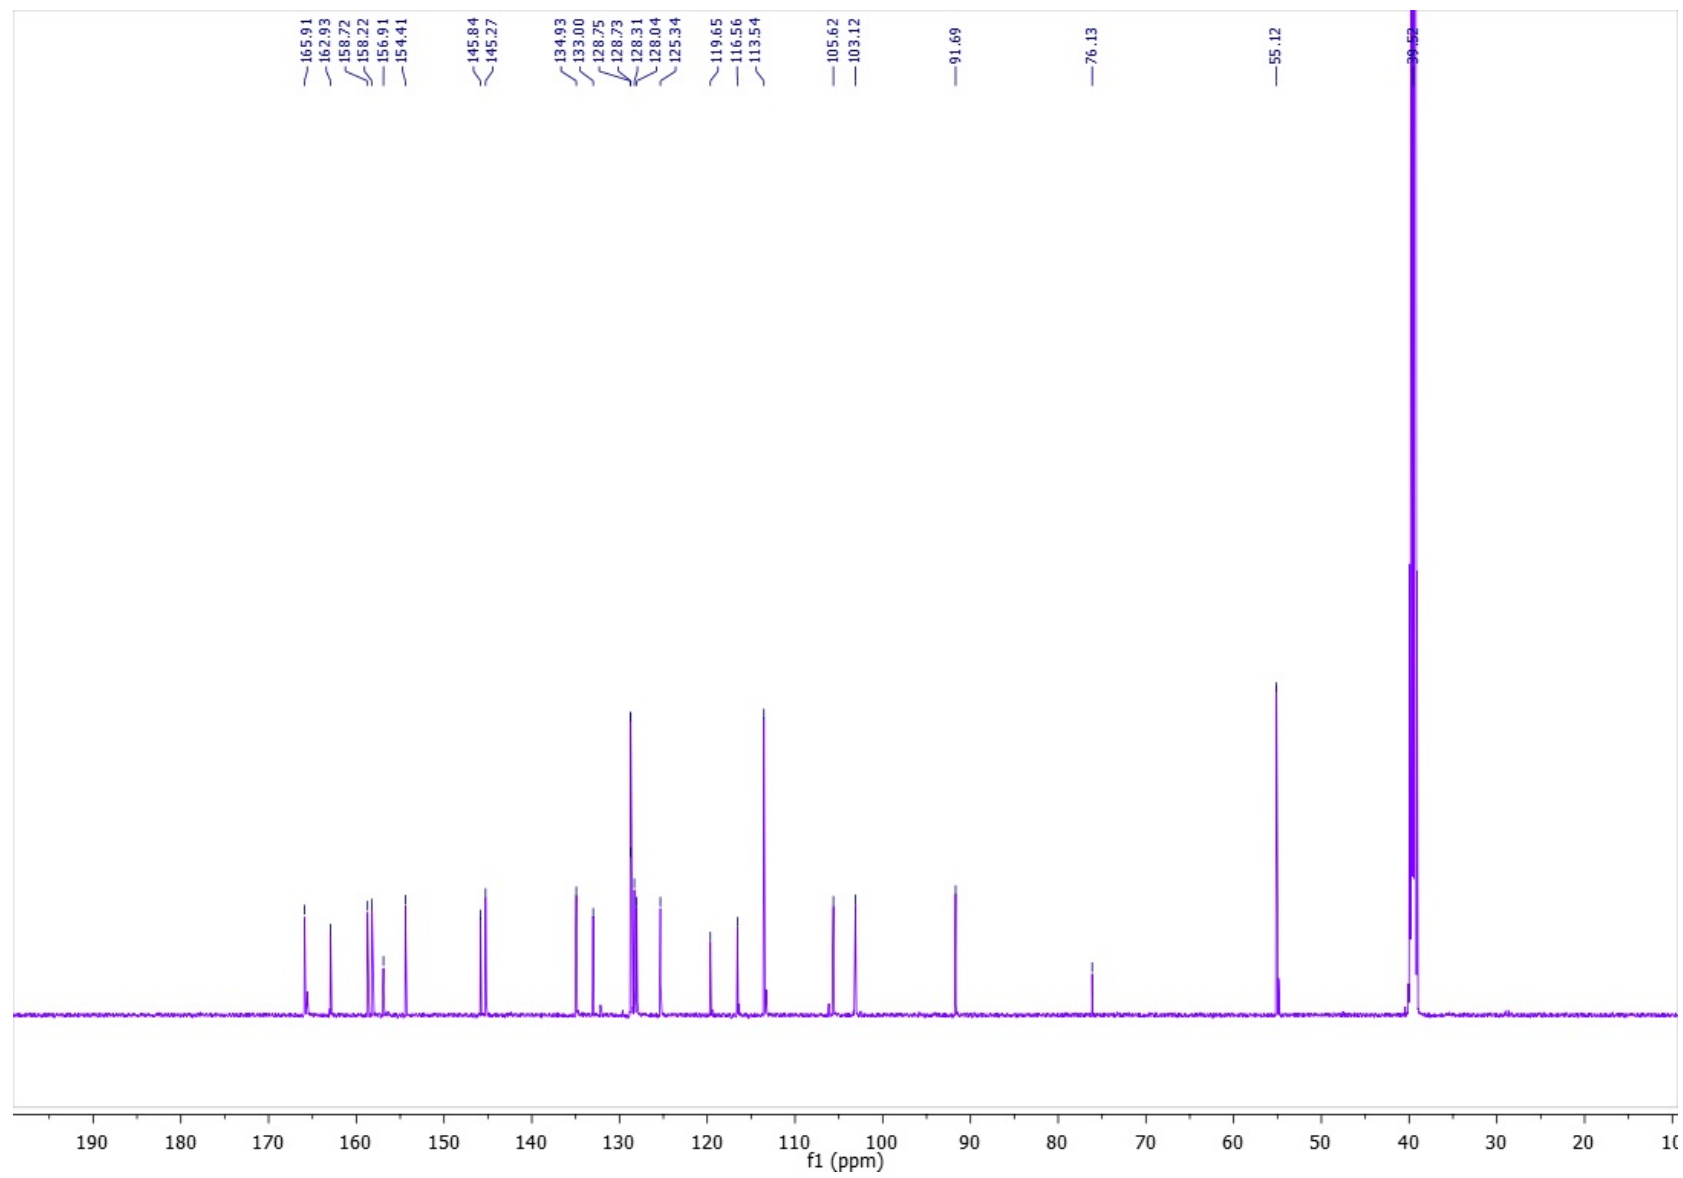

Synthetic Eudistidine C Phloroglucinol Analogue (10)  $^1\text{H}$  NMR Spectrum (600 MHz,  $\text{CD}_3\text{OD}$ )

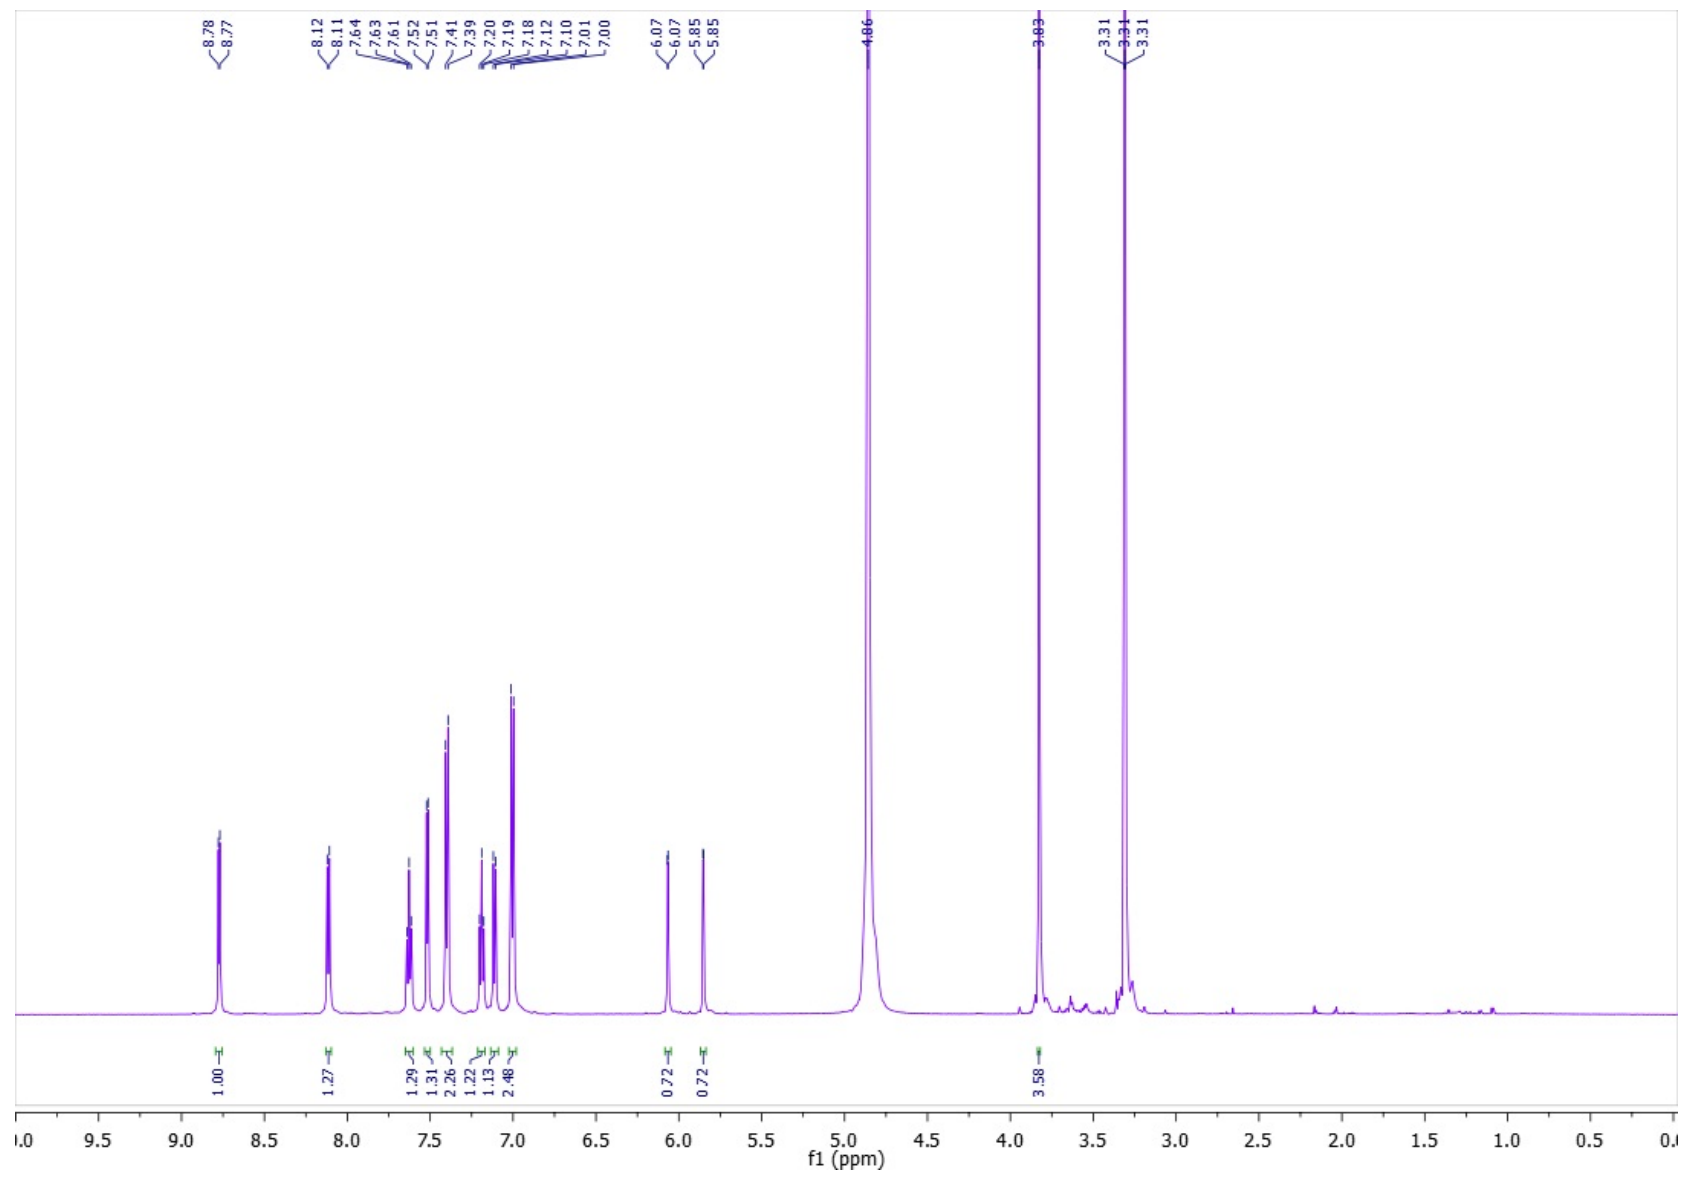

Synthetic Eudistidine C Phloroglucinol Analogue (10)  $^{13}\text{C}$  NMR Spectrum (150 MHz,  $\text{CD}_3\text{OD}$ )

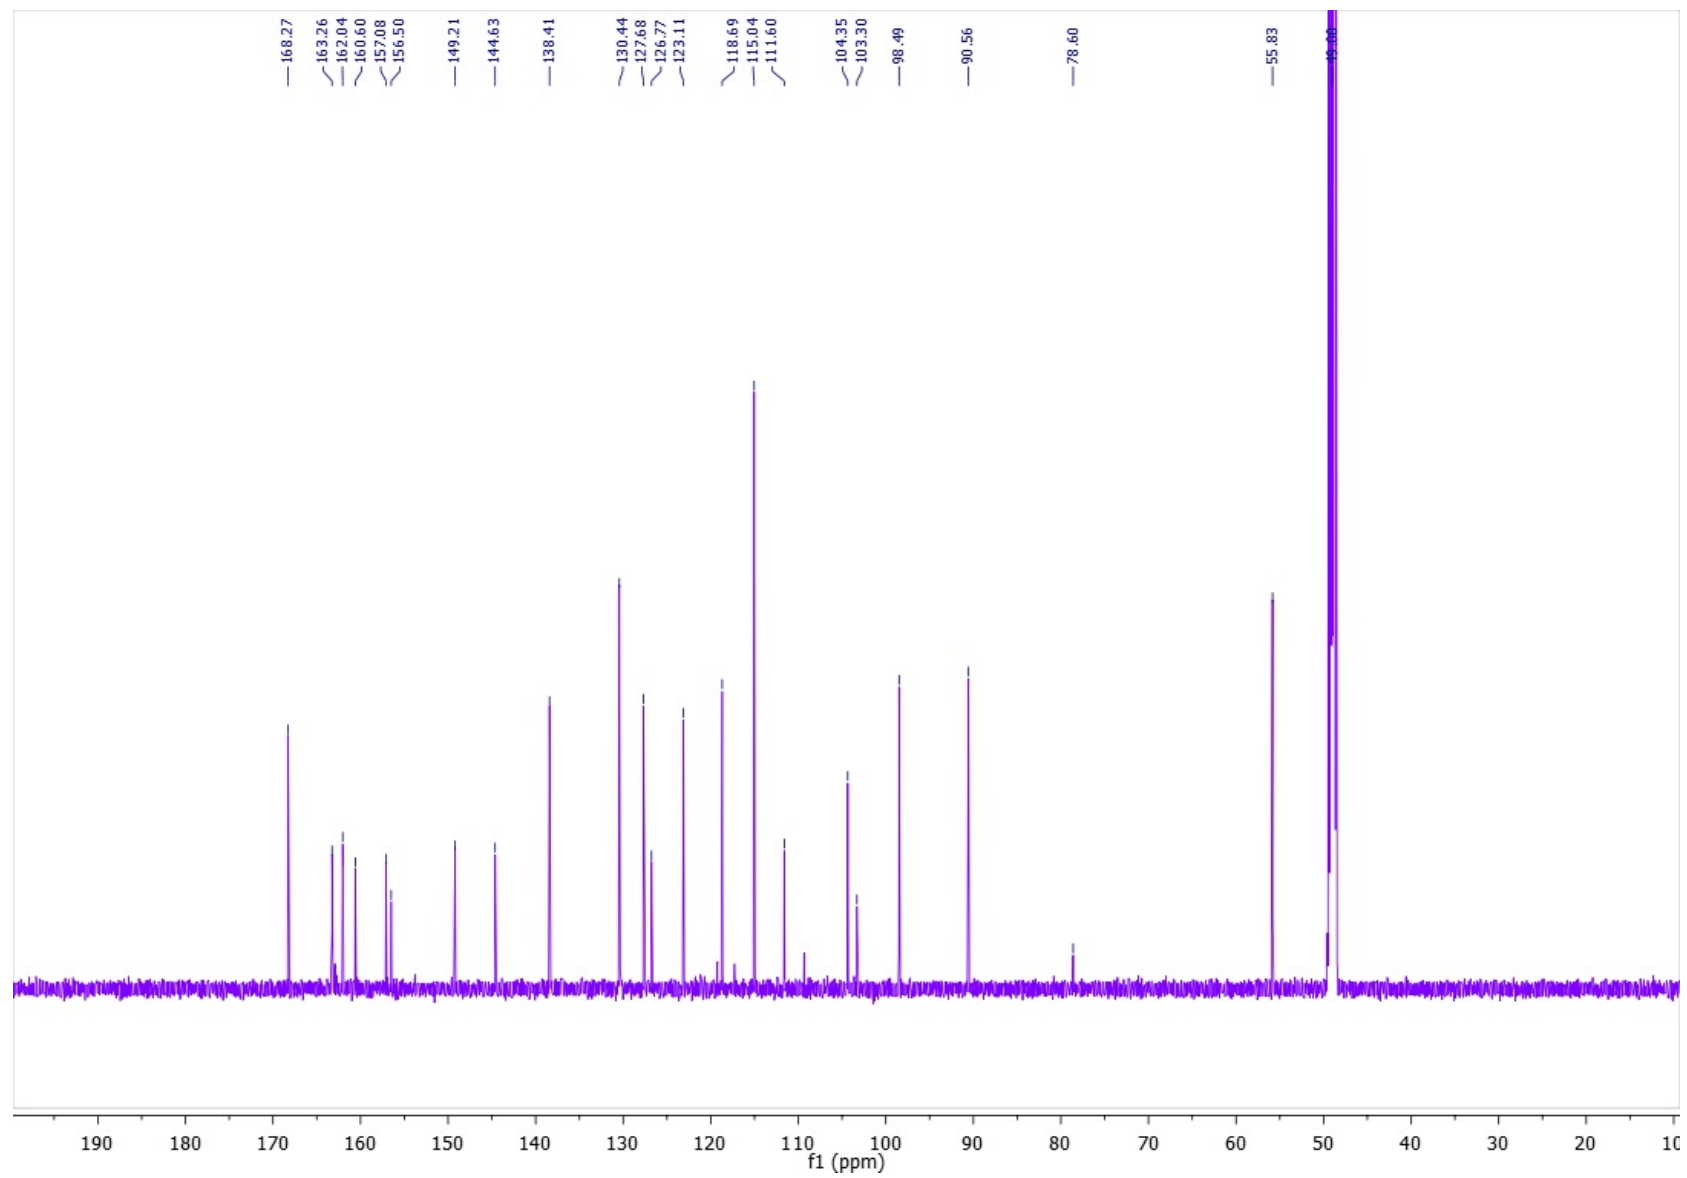

# Imidazole 4 1H NMR spectrum (600 MHz, DMSO-d<sub>6</sub>)

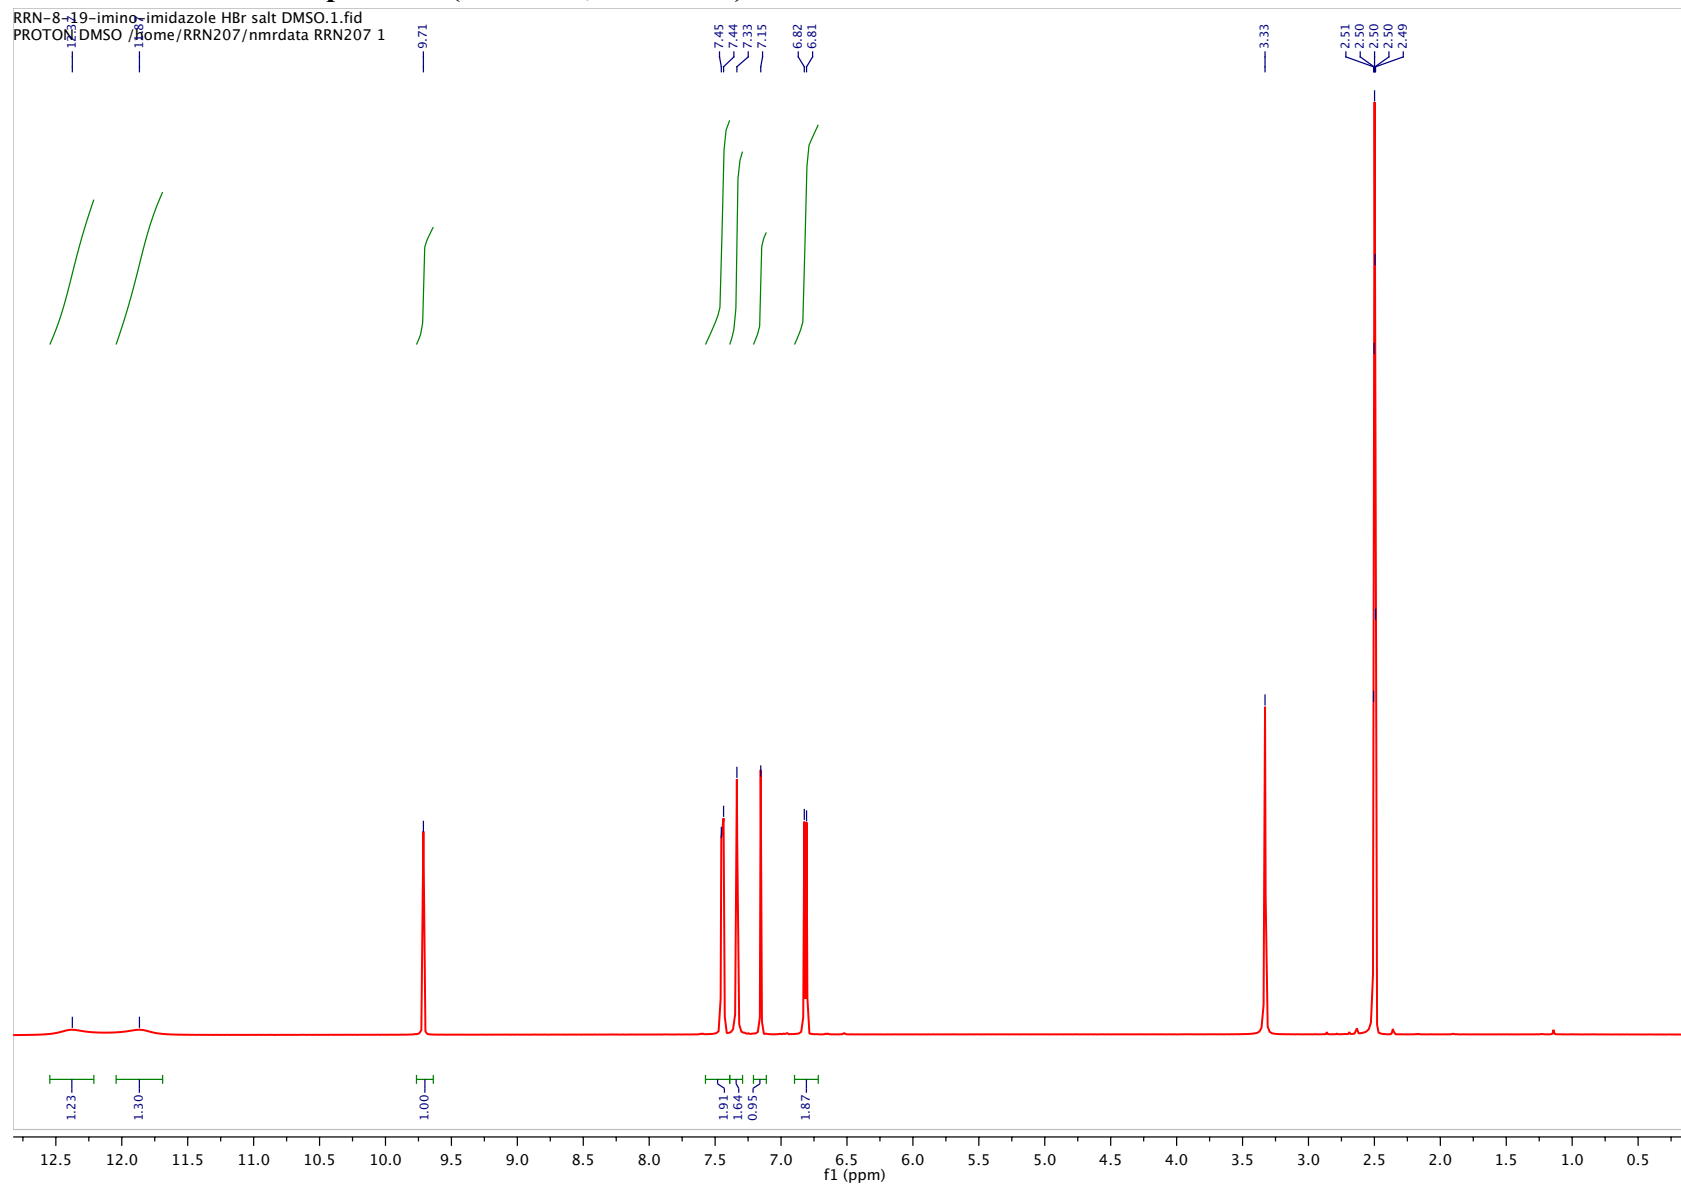

Supplement: NIHMS999702-supplement-supplemental.pdf [file NIHMS999702-supplement-supplemental.pdf]
